# Supplementary material for: Visible-light-induced three-component reactions of α-diazoesters, quinazolinones and cyclic ethers toward quinazoline-based hybrids
Source: Royal Society of Chemistry journal article supplement (doi:10.1039/d4ob00295d), 2024-01-01

## Supporting Information

# Visible-Light-Induced Three-Component Reactions of $\alpha$ - Diazoesters, Quinazolinones and Cyclic Ethers Lead to Quinazoline- Based Hybrids

Yan Liu, Qin Yang, Wei Wang, Yang Fu, Qiuping and Yiyuan Peng\*

*Key Laboratory for Green Chemistry of Jiangxi Province, College of Chemistry and  
Chemical Engineering, Jiangxi Normal University, 99 Ziyang Avenue, Nanchang  
330022, China*

## Contents

|                                                               |   |
|---------------------------------------------------------------|---|
| Supporting Information.....                                   | 1 |
| I. X-ray Single Crystal Diffraction Data of <b>4aaa</b> ..... | 2 |
| II. Copies of NMR Spectra .....                               | 3 |

## I. X-ray Single Crystal Diffraction Data of 4aaa

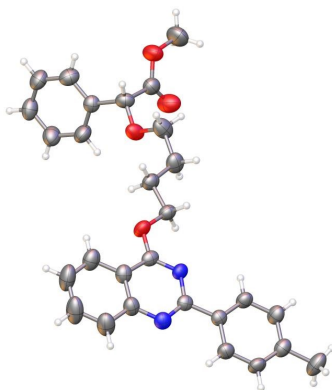

Bond precision: C-C = 0.0073 Å      Wavelength=0.71073  
Cell:                    a=6.1921(6)      b=11.9580(15)      c=32.979(4)  
                              alpha=90      beta=91.359(10)      gamma=90  
Temperature:            293 K

|                        | Calculated    | Reported      |
|------------------------|---------------|---------------|
| Volume                 | 2441.3(5)     | 2441.3(5)     |
| Space group            | P 21/n        | P 1 21/n 1    |
| Hall group             | -P 2yn        | -P 2yn        |
| Moiety formula         | C28 H28 N2 O4 | C28 H28 N2 O4 |
| Sum formula            | C28 H28 N2 O4 | C28 H28 N2 O4 |
| Mr                     | 456.52        | 456.52        |
| Dx, g cm <sup>-3</sup> | 1.242         | 1.242         |
| Z                      | 4             | 4             |
| Mu (mm <sup>-1</sup> ) | 0.083         | 0.083         |
| F000                   | 968.0         | 968.0         |
| F000'                  | 968.44        |               |
| h, k, lmax             | 7, 14, 41     | 7, 14, 41     |
| Nref                   | 4990          | 4981          |
| Tmin, Tmax             | 0.987, 0.992  | 0.535, 1.000  |
| Tmin'                  | 0.975         |               |

Correction method= # Reported T Limits: Tmin=0.535 Tmax=1.000  
AbsCorr = MULTI-SCAN

Data completeness= 0.998      Theta(max)= 26.372

R(reflections)= 0.1175( 2898)      wR2(reflections)=  
S = 1.072      Npar= 309      0.2823( 4981)

## II. Copies of NMR Spectra

<sup>1</sup>H-NMR of **4aaa** (CDCl<sub>3</sub>, 400 Hz)

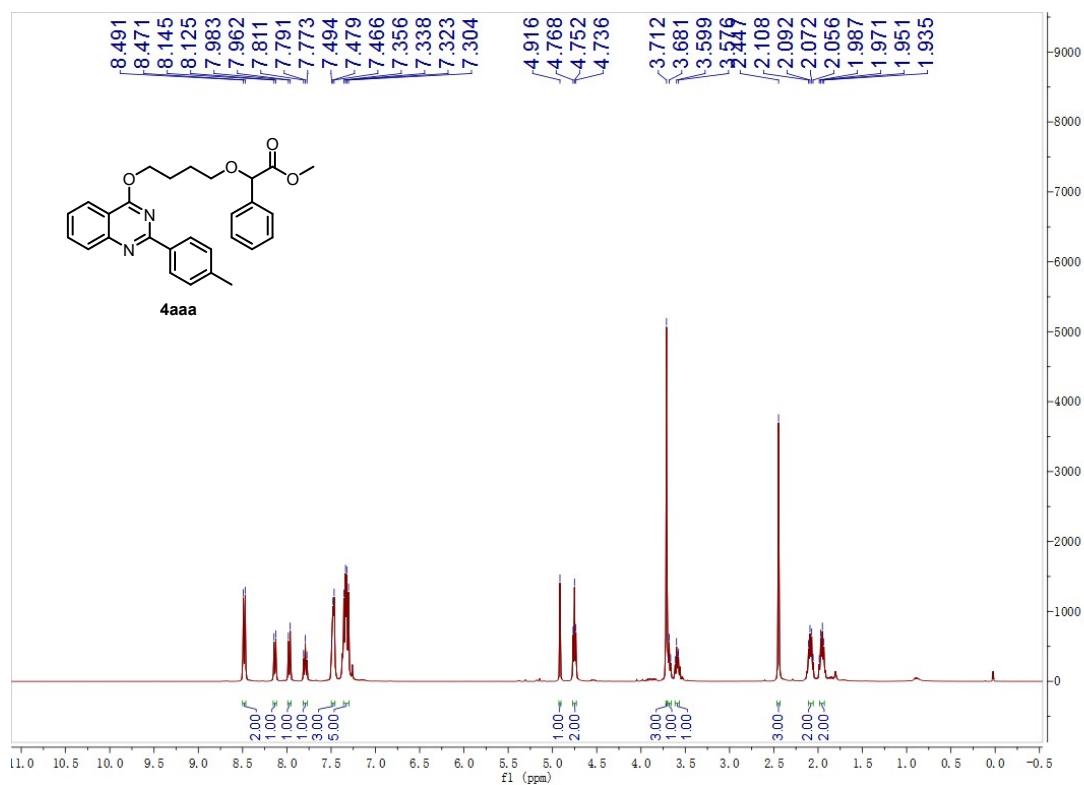

<sup>13</sup>C-NMR of **4aaa** (CDCl<sub>3</sub>, 100 Hz)

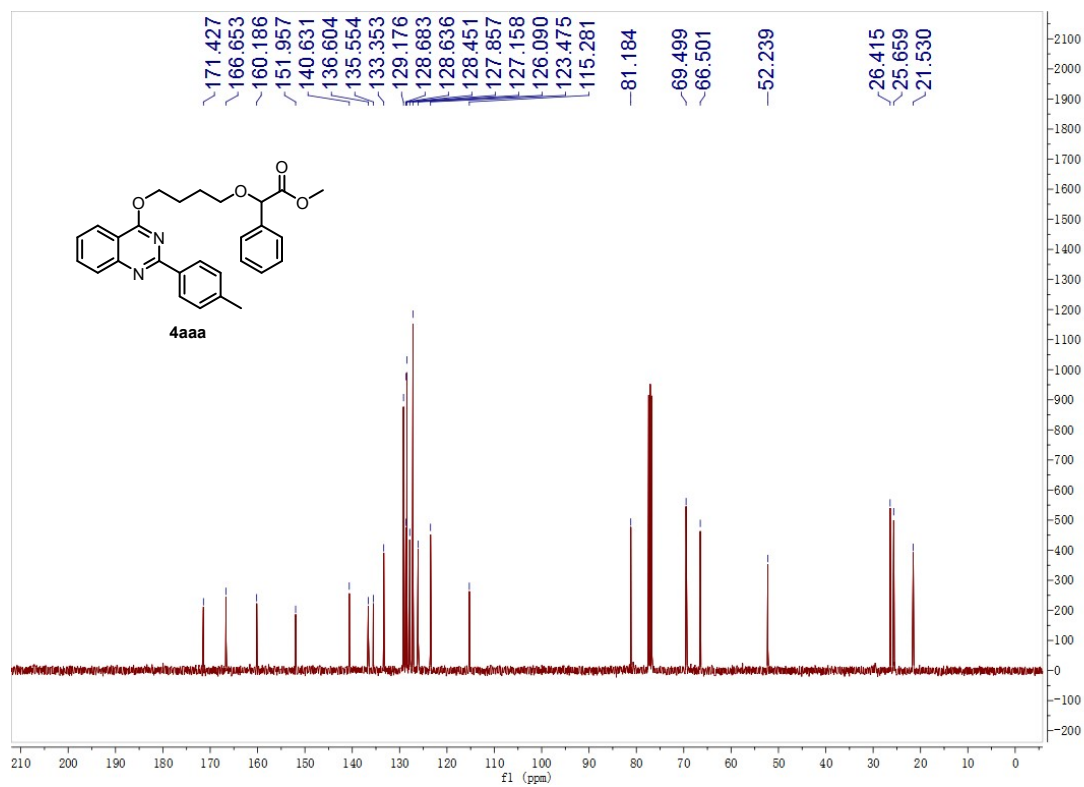

<sup>1</sup>H-NMR of **4baa** (CDCl<sub>3</sub>, 400 Hz)

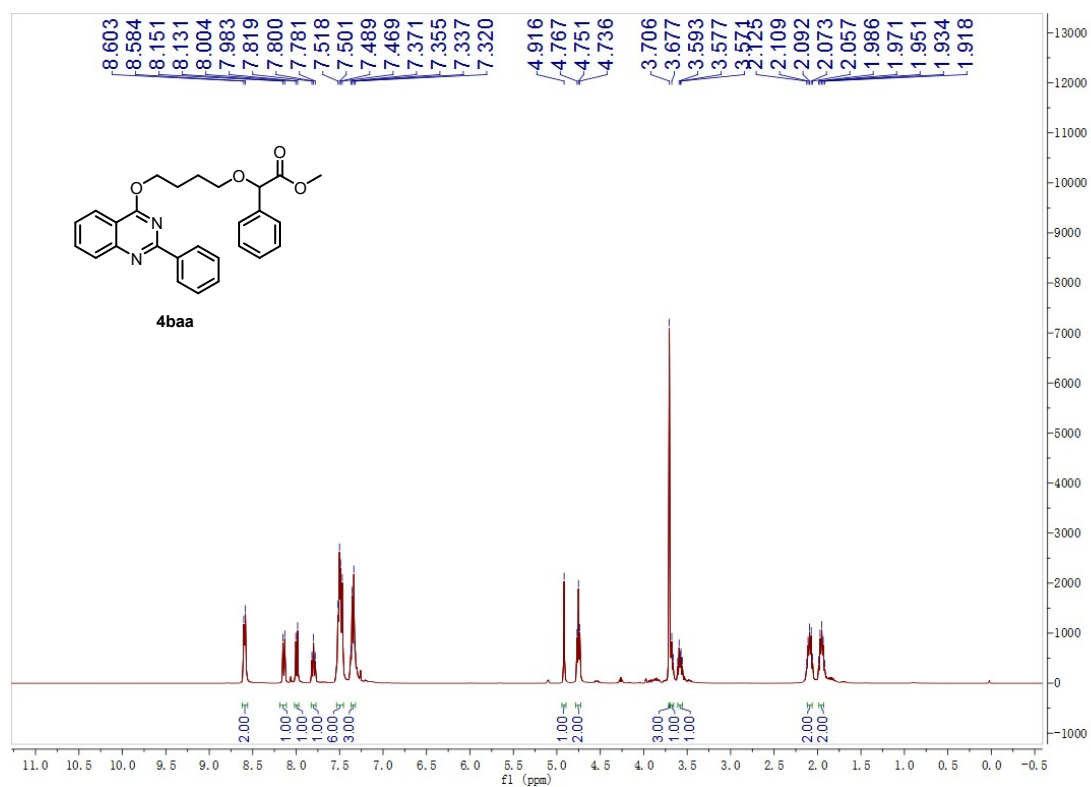

<sup>13</sup>C-NMR of **4baa** (CDCl<sub>3</sub>, 100 Hz)

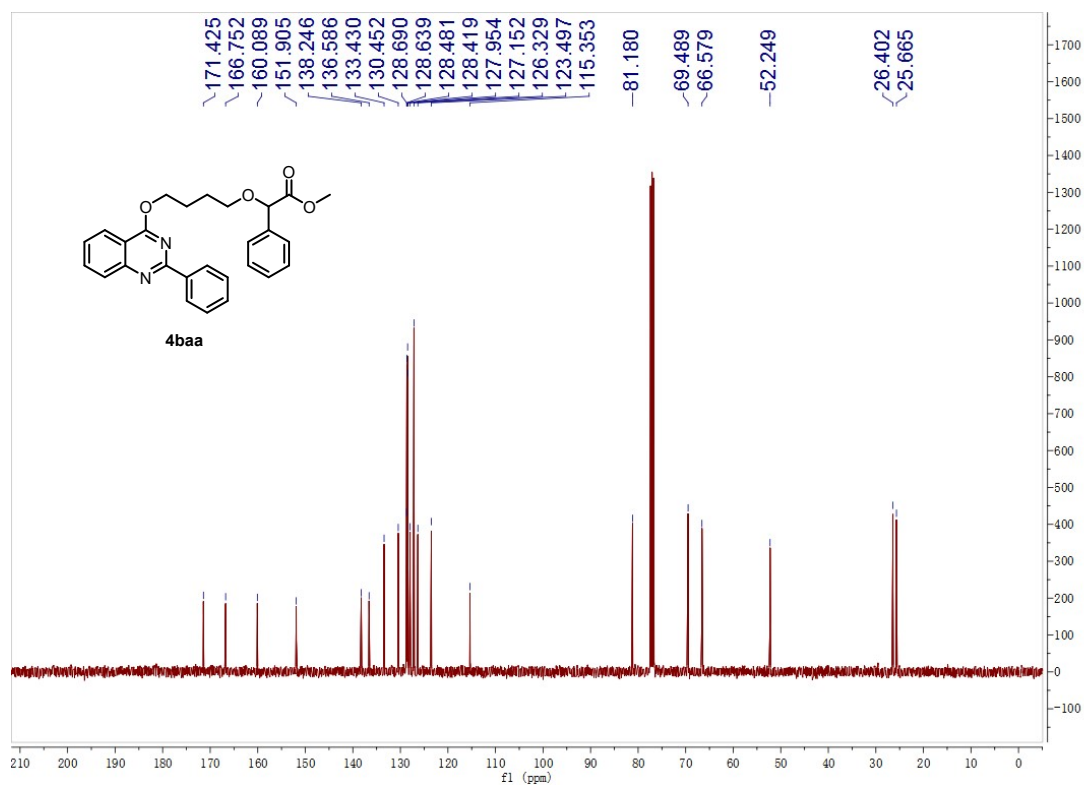

<sup>1</sup>H-NMR of **4caa** (CDCl<sub>3</sub>, 400 Hz)

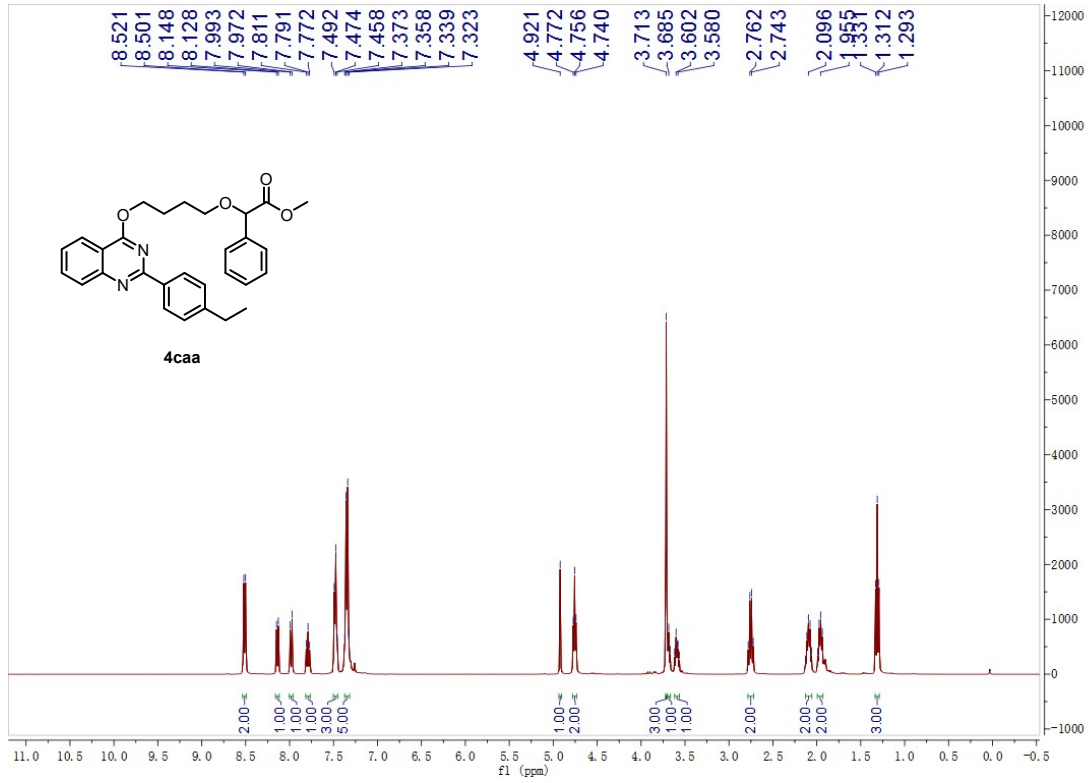

<sup>13</sup>C-NMR of **4caa** (CDCl<sub>3</sub>, 100 Hz)

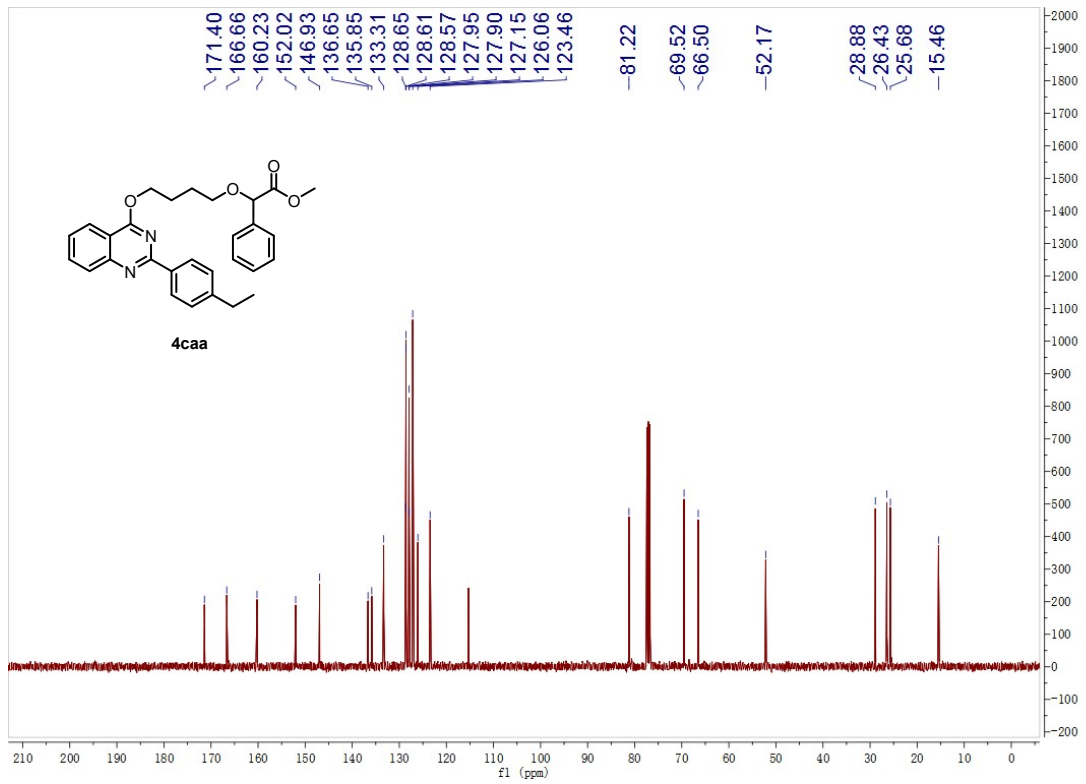

<sup>1</sup>H-NMR of **4daa** (CDCl<sub>3</sub>, 400 Hz)

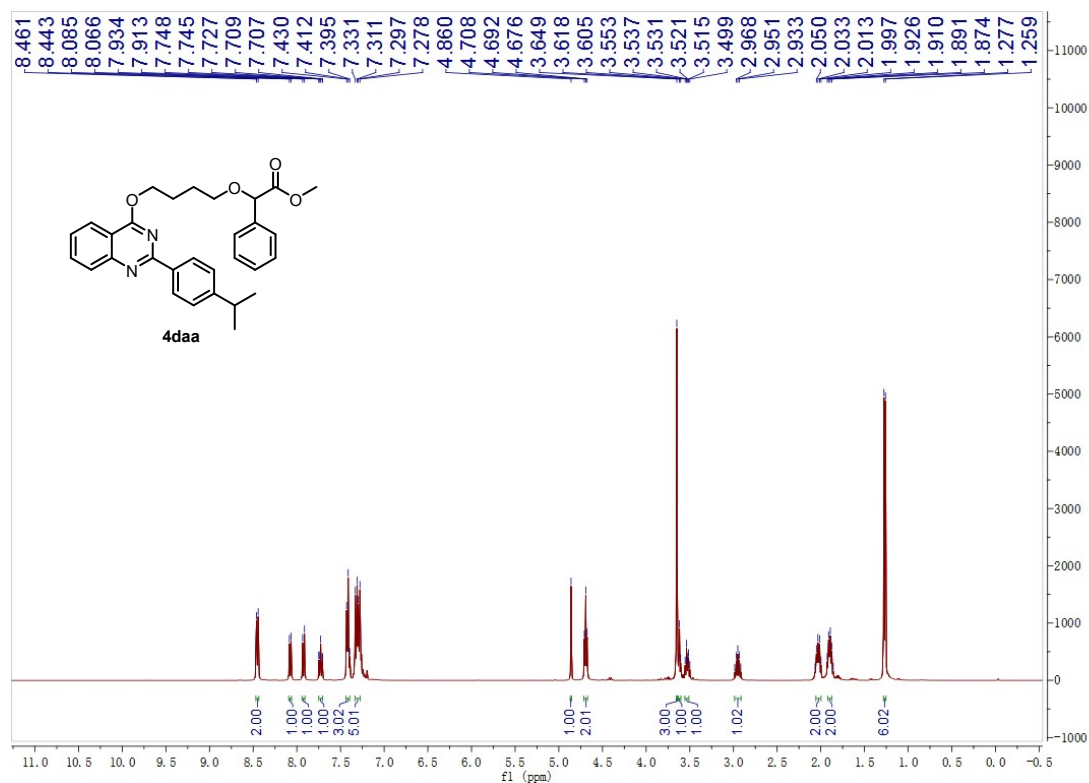

<sup>13</sup>C-NMR of **4daa** (CDCl<sub>3</sub>, 100 Hz)

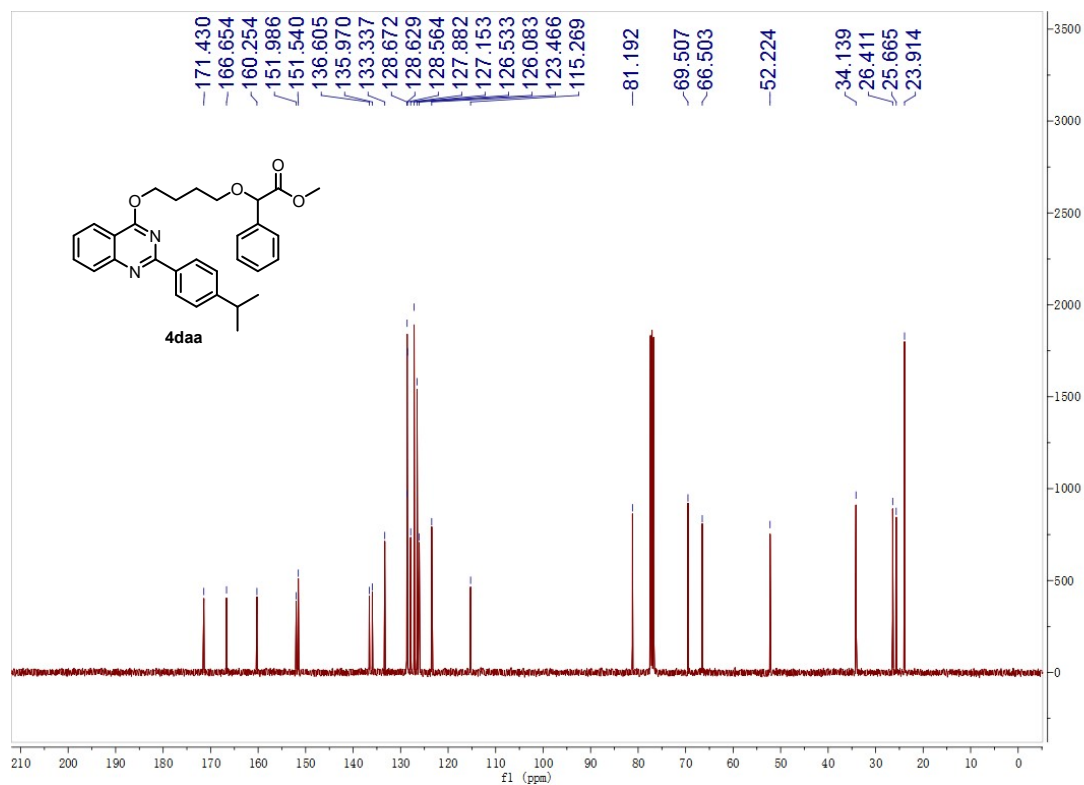

<sup>1</sup>H-NMR of **4eaa** (CDCl<sub>3</sub>, 400 Hz)

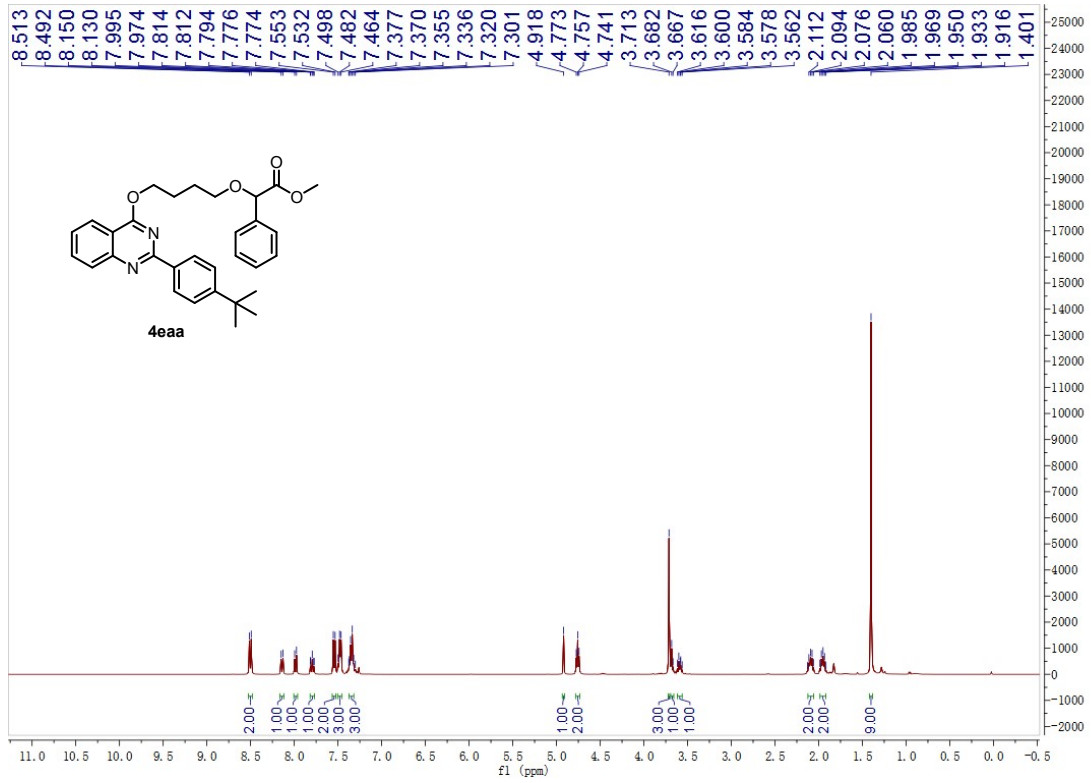

<sup>13</sup>C-NMR of **4eaa** (CDCl<sub>3</sub>, 100 Hz)

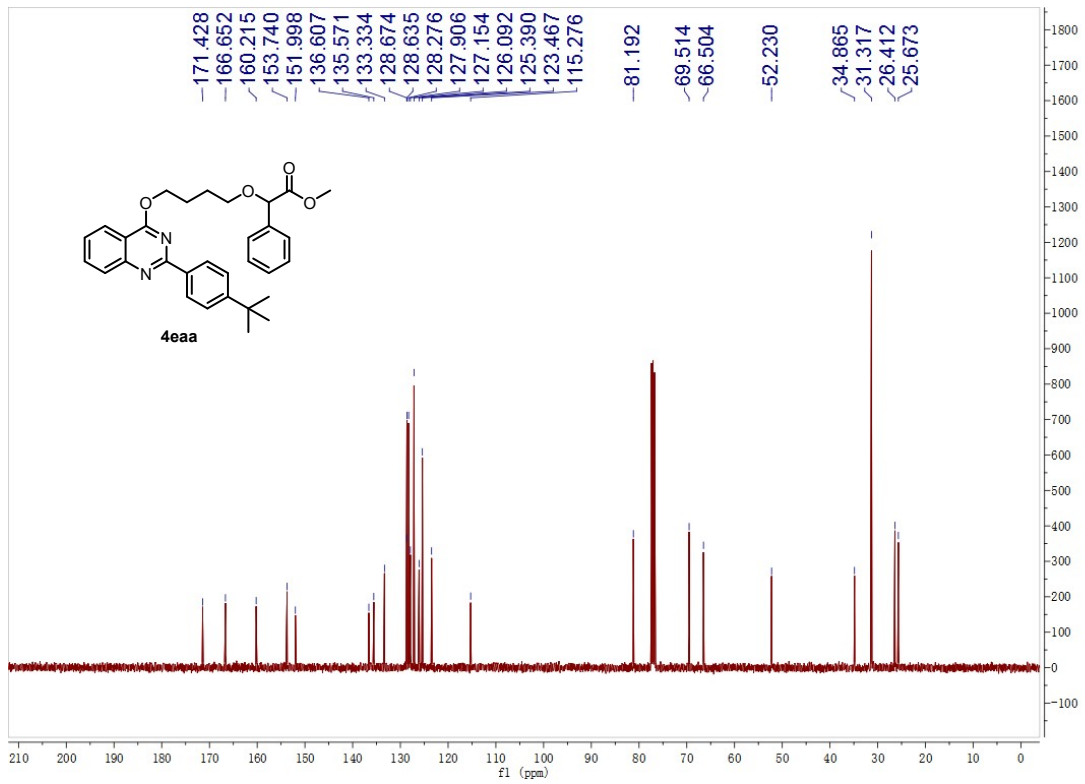

<sup>1</sup>H-NMR of **4faa** (CDCl<sub>3</sub>, 400 Hz)

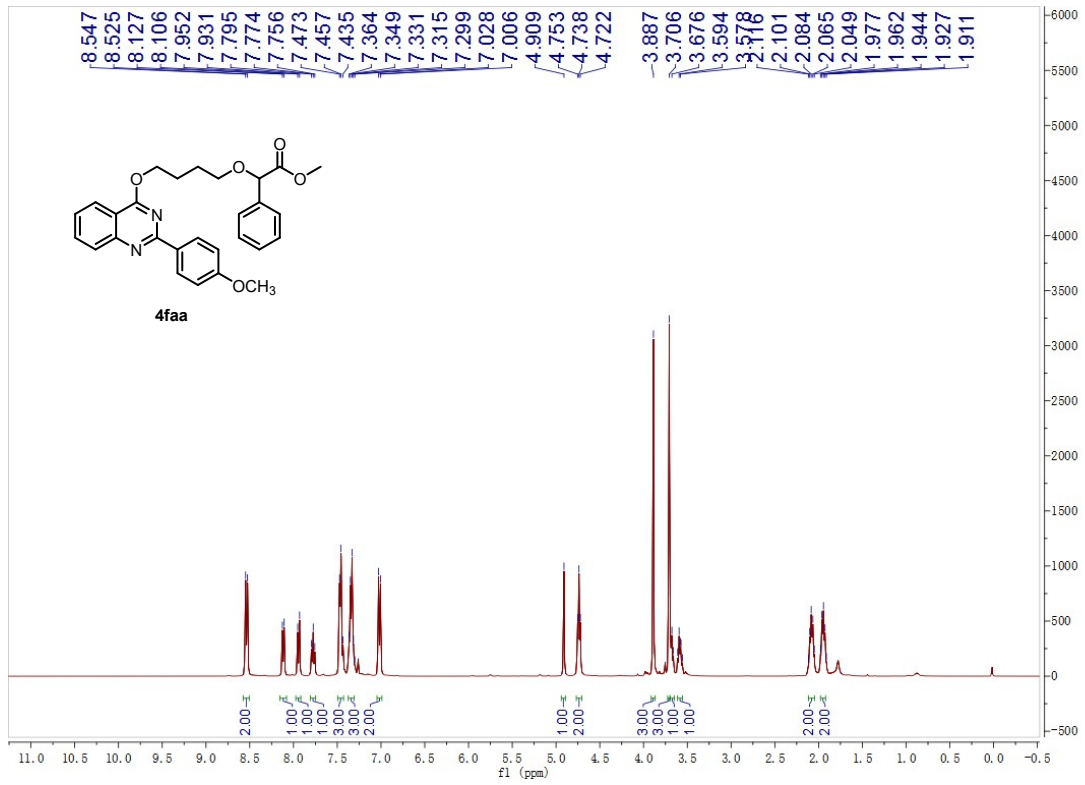

<sup>13</sup>C-NMR of **4faa** (CDCl<sub>3</sub>, 100 Hz)

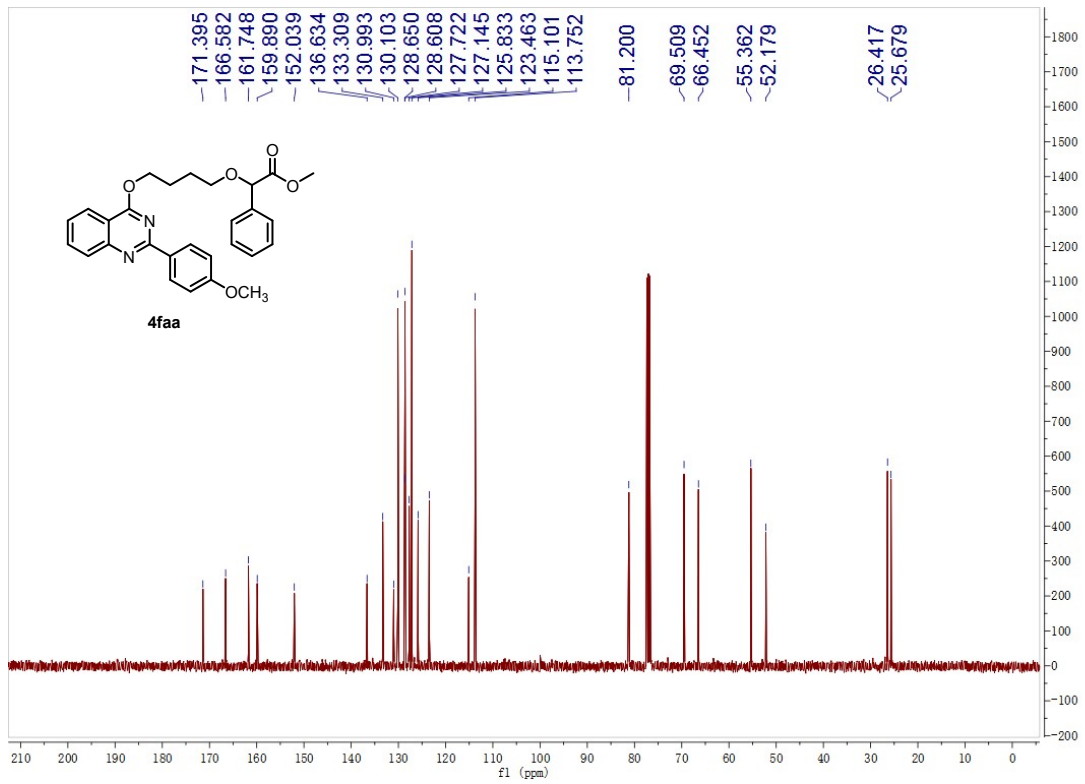



<sup>1</sup>H-NMR of **4gaa** (CDCl<sub>3</sub>, 400 Hz)

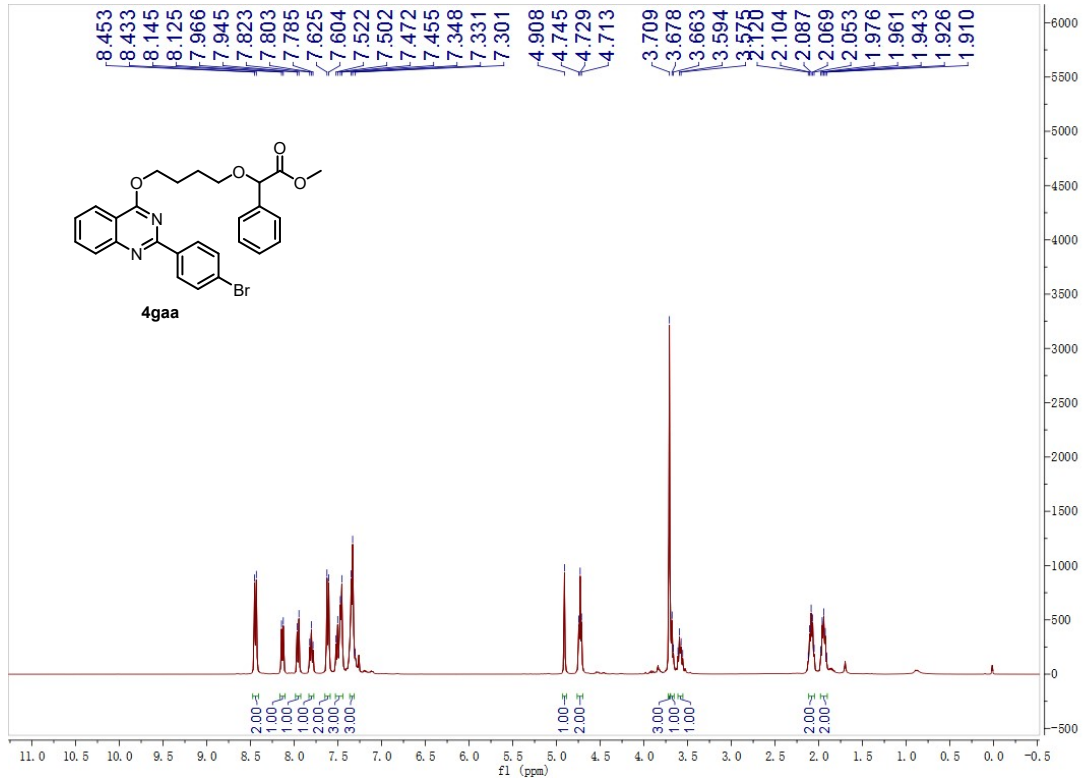

<sup>13</sup>C-NMR of **4gaa** (CDCl<sub>3</sub>, 100 Hz)

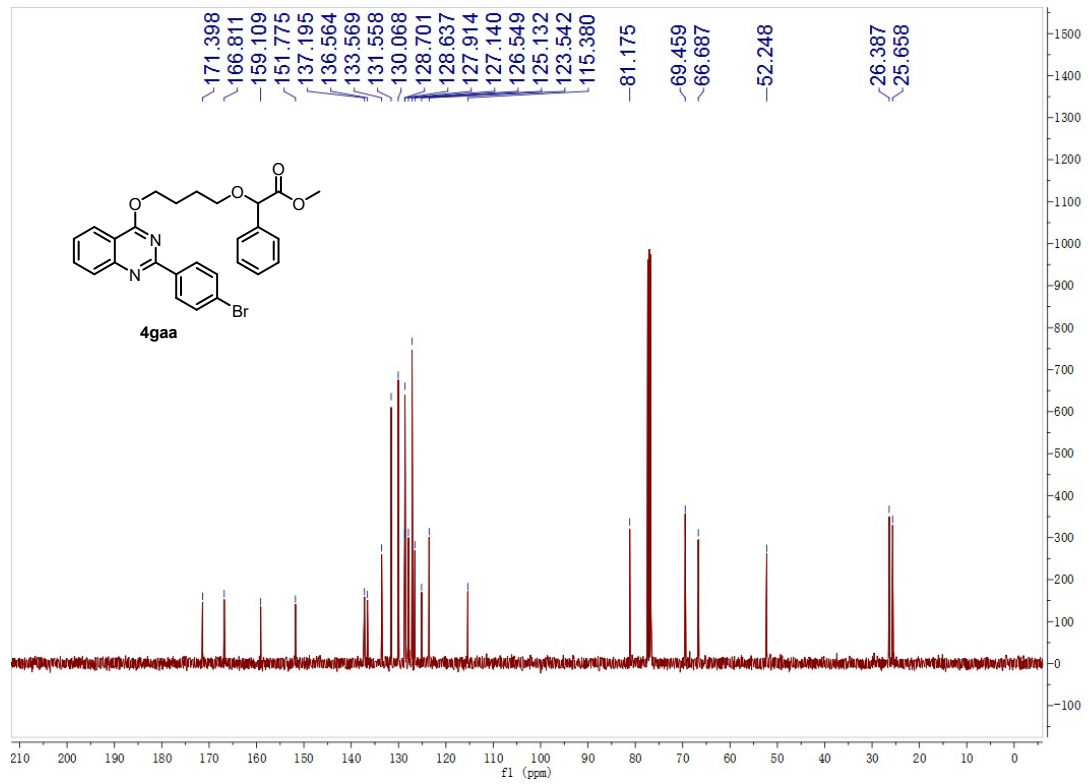

<sup>1</sup>H-NMR of **4haa** (CDCl<sub>3</sub>, 400 Hz)

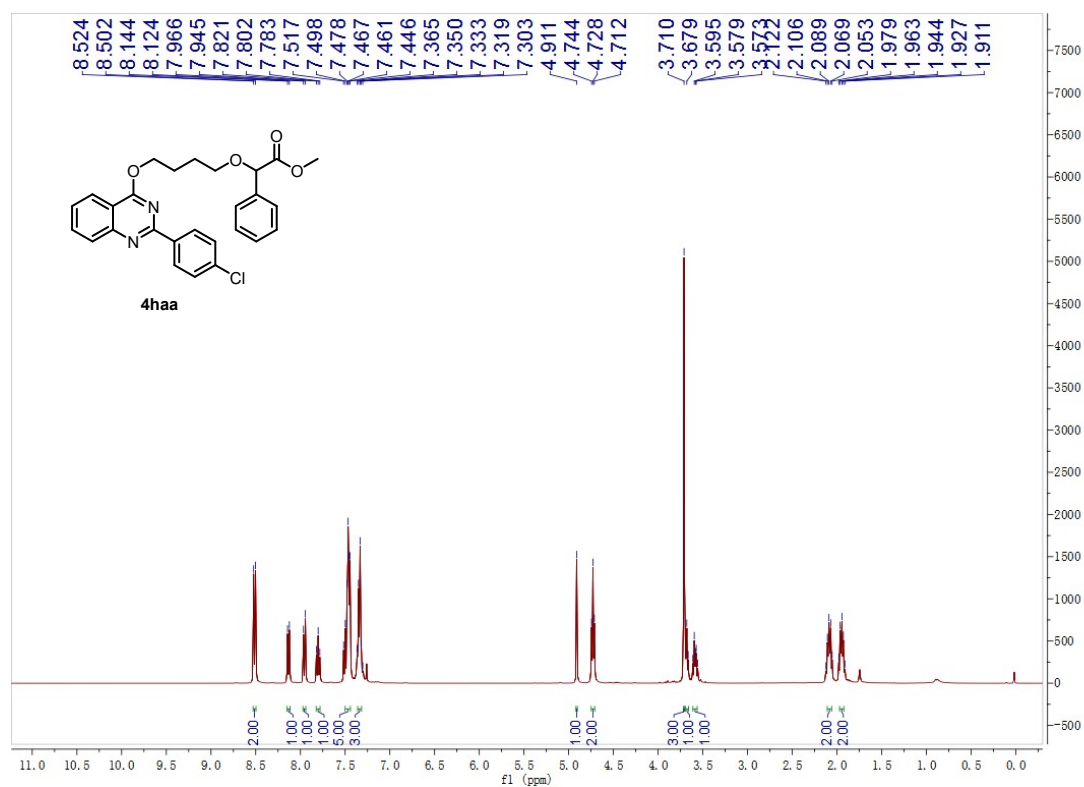

<sup>13</sup>C-NMR of **4haa** (CDCl<sub>3</sub>, 100 Hz)

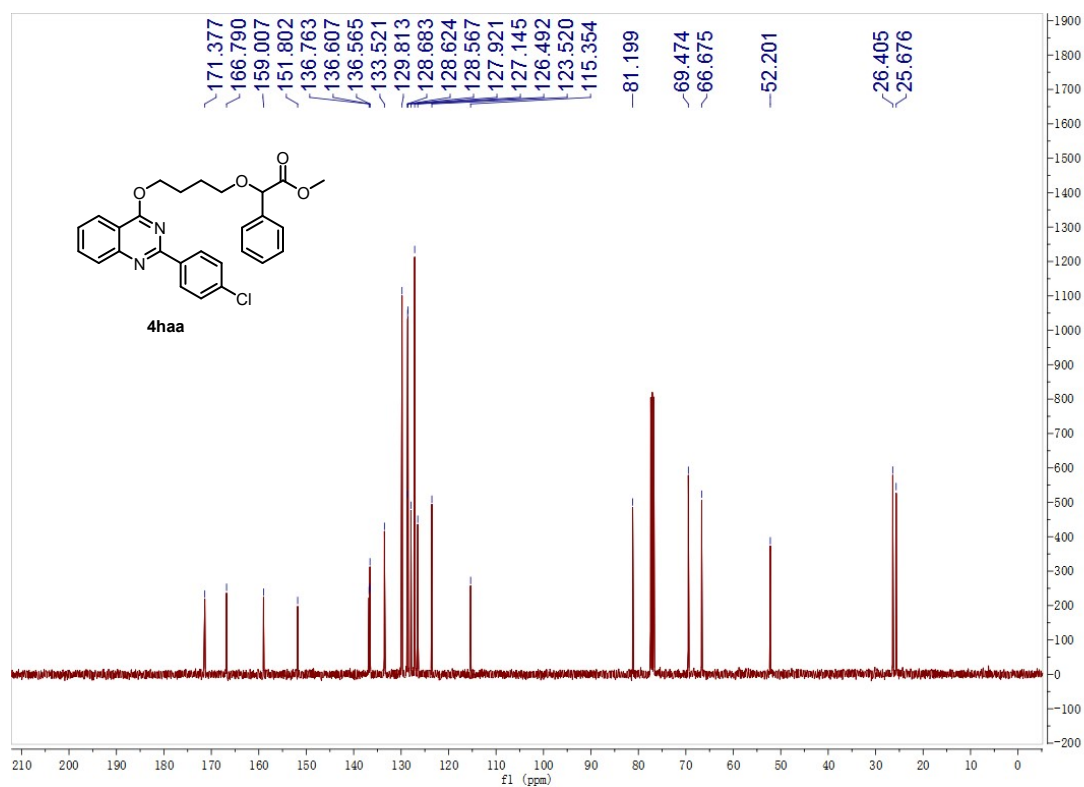

<sup>1</sup>H-NMR of **4iaa** (CDCl<sub>3</sub>, 400 Hz)

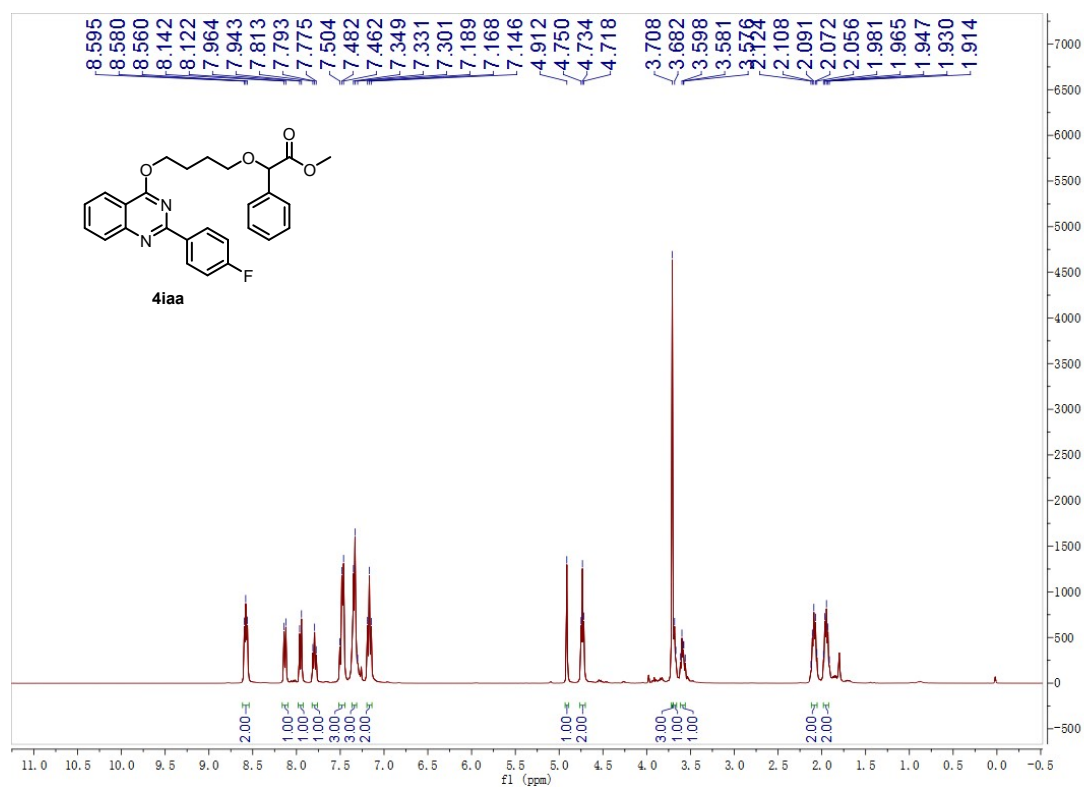

<sup>13</sup>C-NMR of **4iaa** (CDCl<sub>3</sub>, 100 Hz)

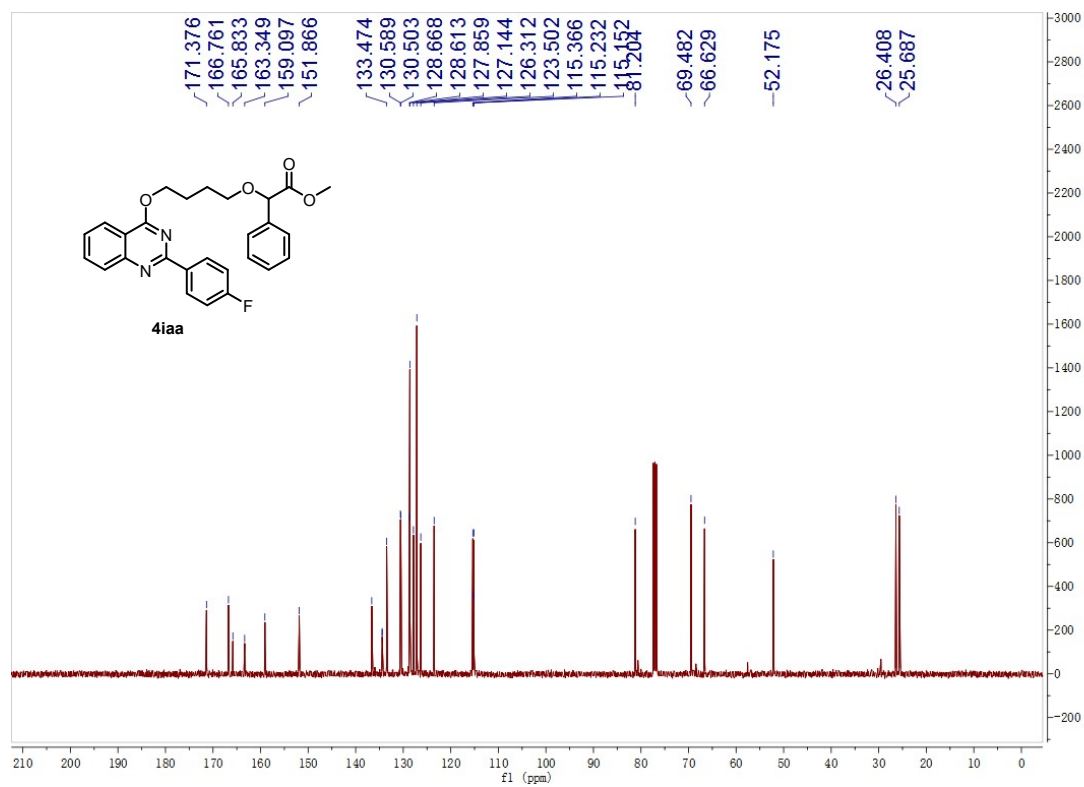

$^{19}\text{F}$ -NMR of **4iaa** ( $\text{CDCl}_3$ , 376 Hz)

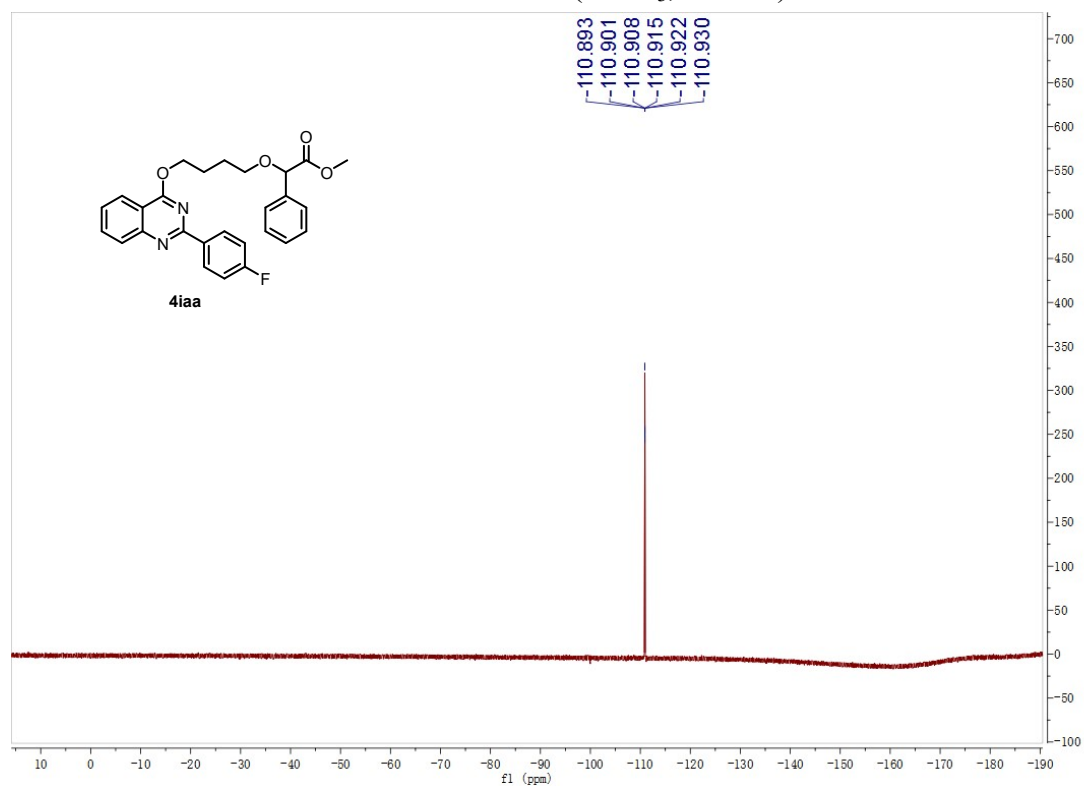

$^1\text{H}$ -NMR of **4jaa** ( $\text{CDCl}_3$ , 400 Hz)

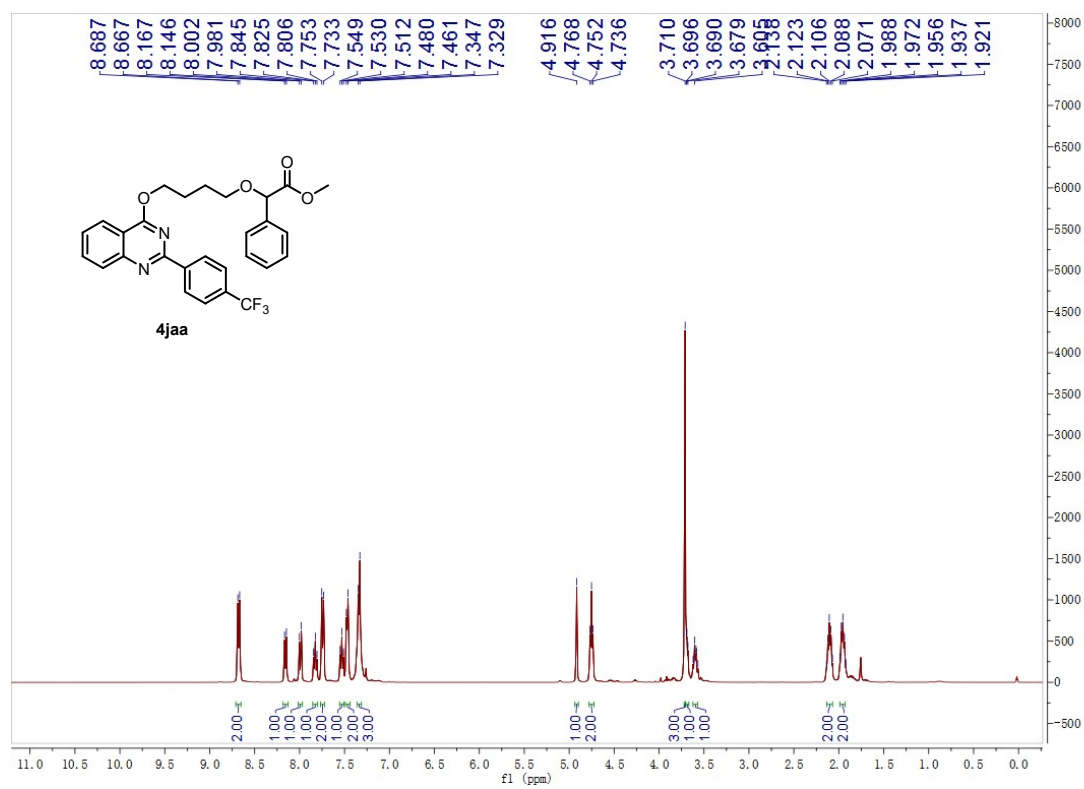

<sup>13</sup>C-NMR of **4jaa** (CDCl<sub>3</sub>, 100 Hz)

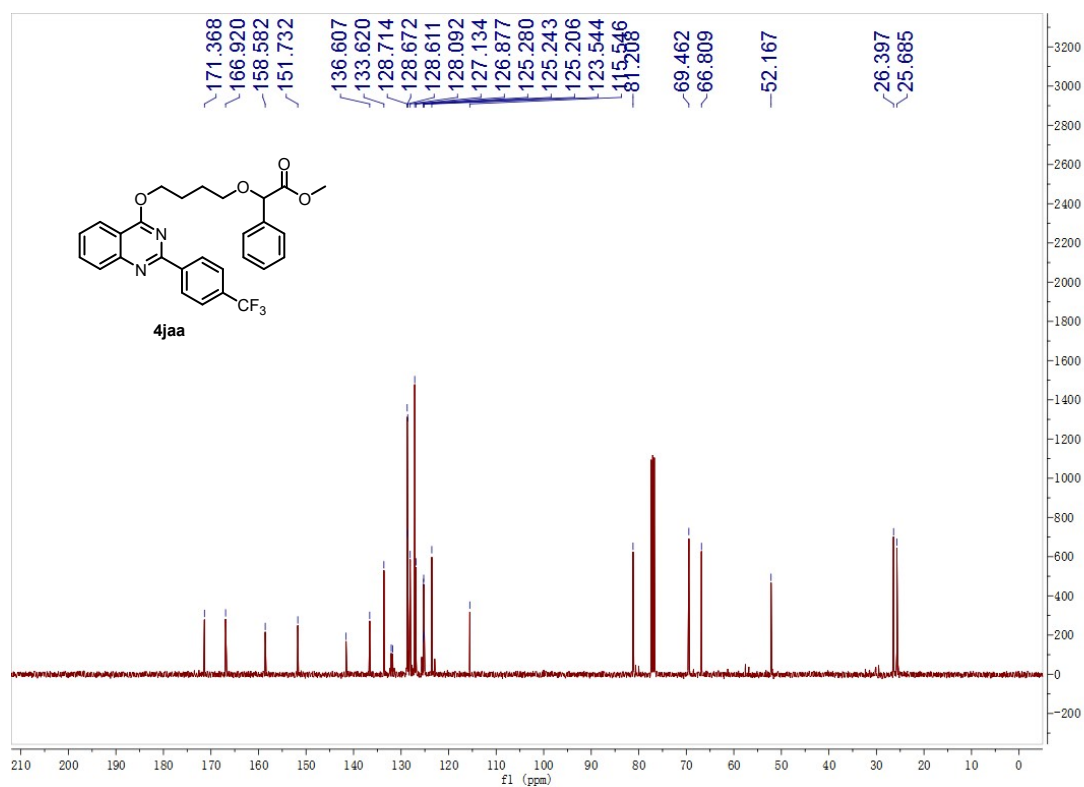

<sup>19</sup>F-NMR of **4jaa** (CDCl<sub>3</sub>, 376 Hz)

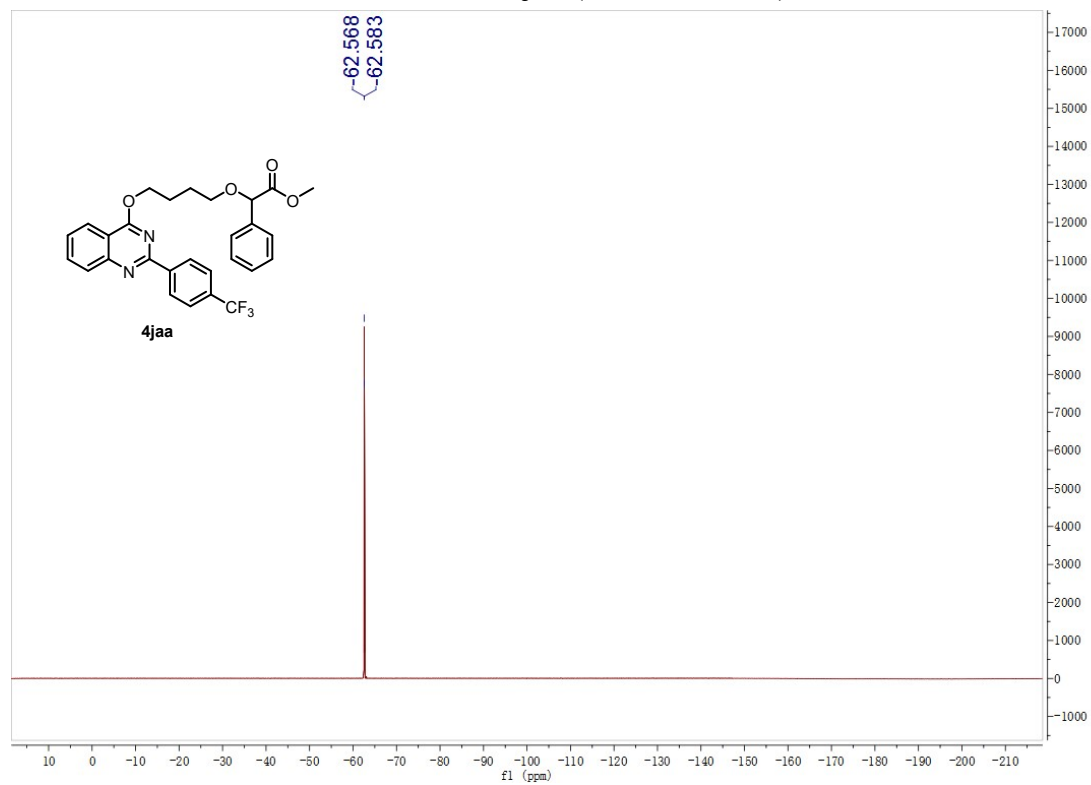

### <sup>1</sup>H-NMR of **4kaa** (CDCl<sub>3</sub>, 400 Hz)

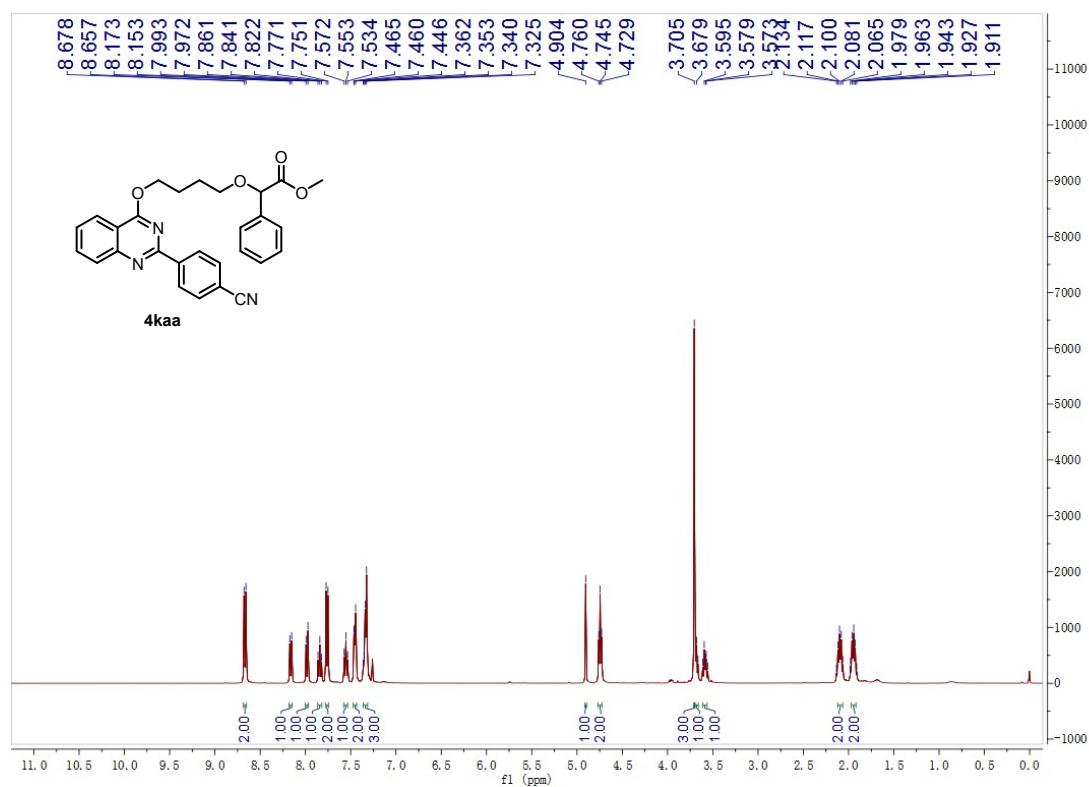

### <sup>13</sup>C-NMR of **4kaa** (CDCl<sub>3</sub>, 100 Hz)

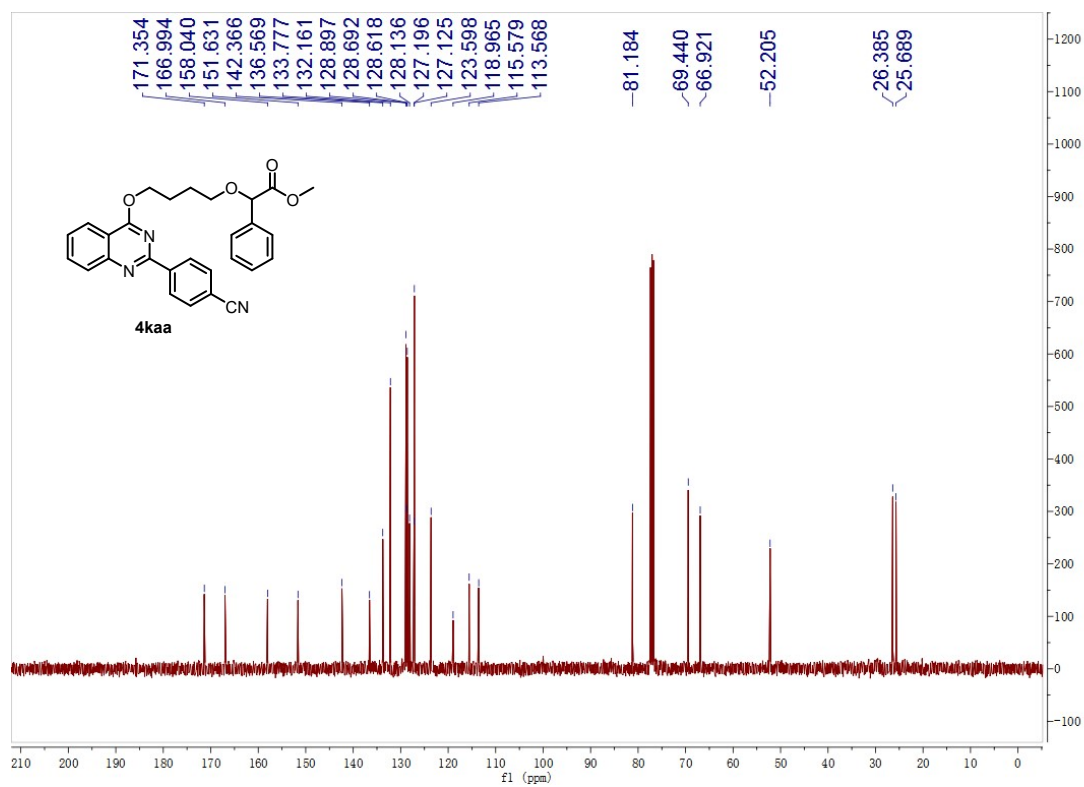

<sup>1</sup>H-NMR of **4laa** (CDCl<sub>3</sub>, 400 Hz)

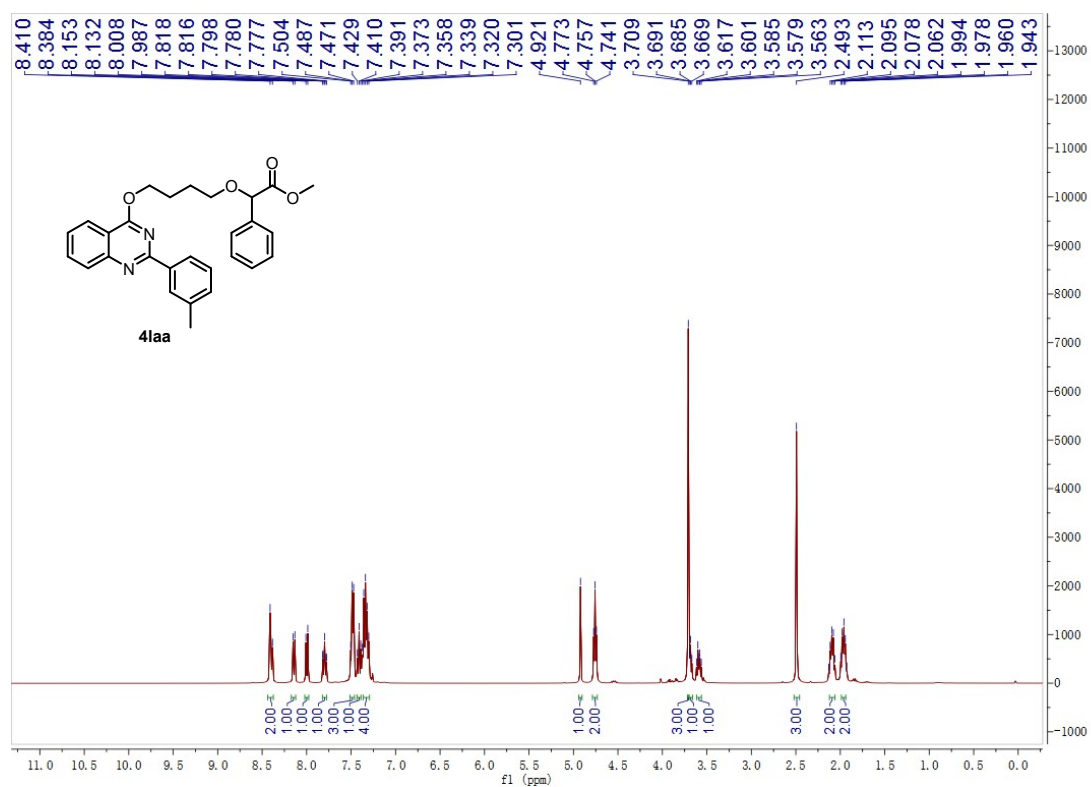

<sup>13</sup>C-NMR of **4laa** (CDCl<sub>3</sub>, 100 Hz)

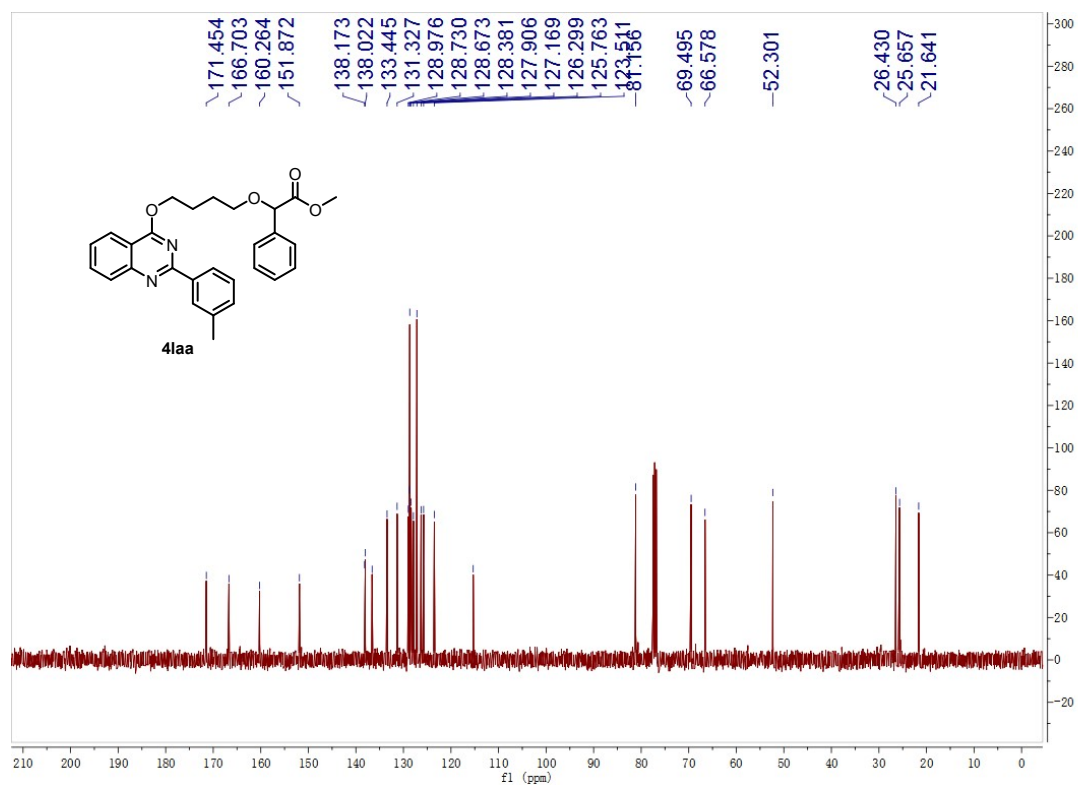

<sup>1</sup>H-NMR of **4maa** (CDCl<sub>3</sub>, 400 Hz)

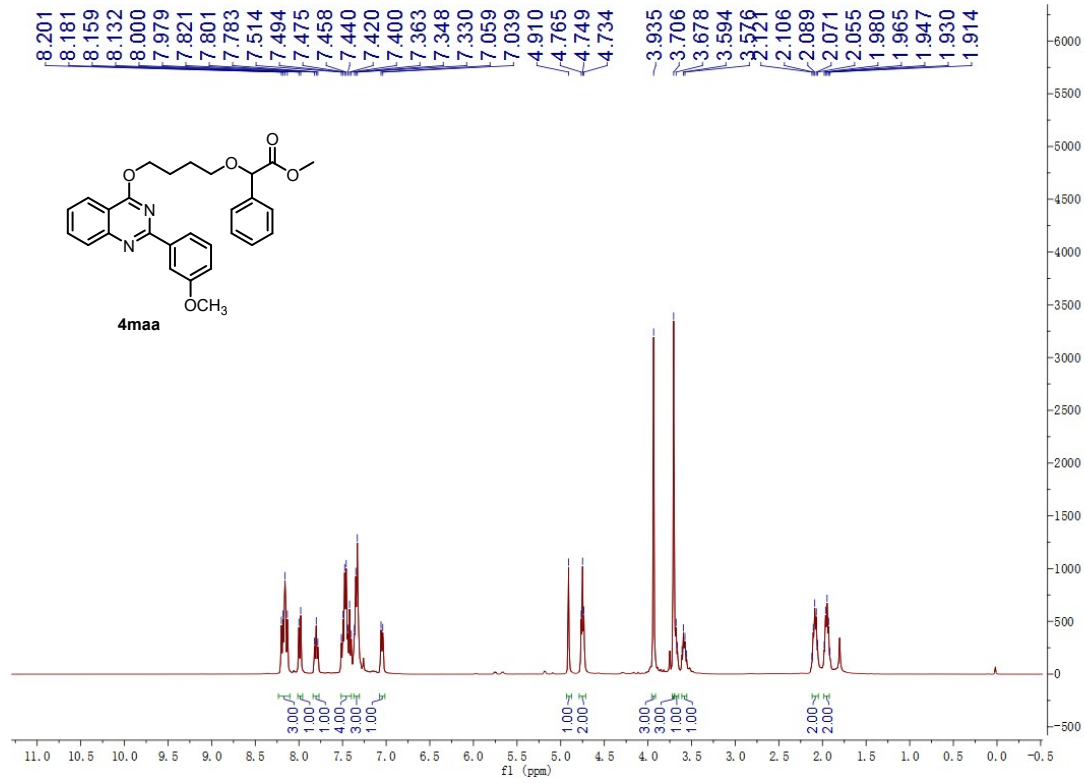

<sup>13</sup>C-NMR of **4maa** (CDCl<sub>3</sub>, 100 Hz)

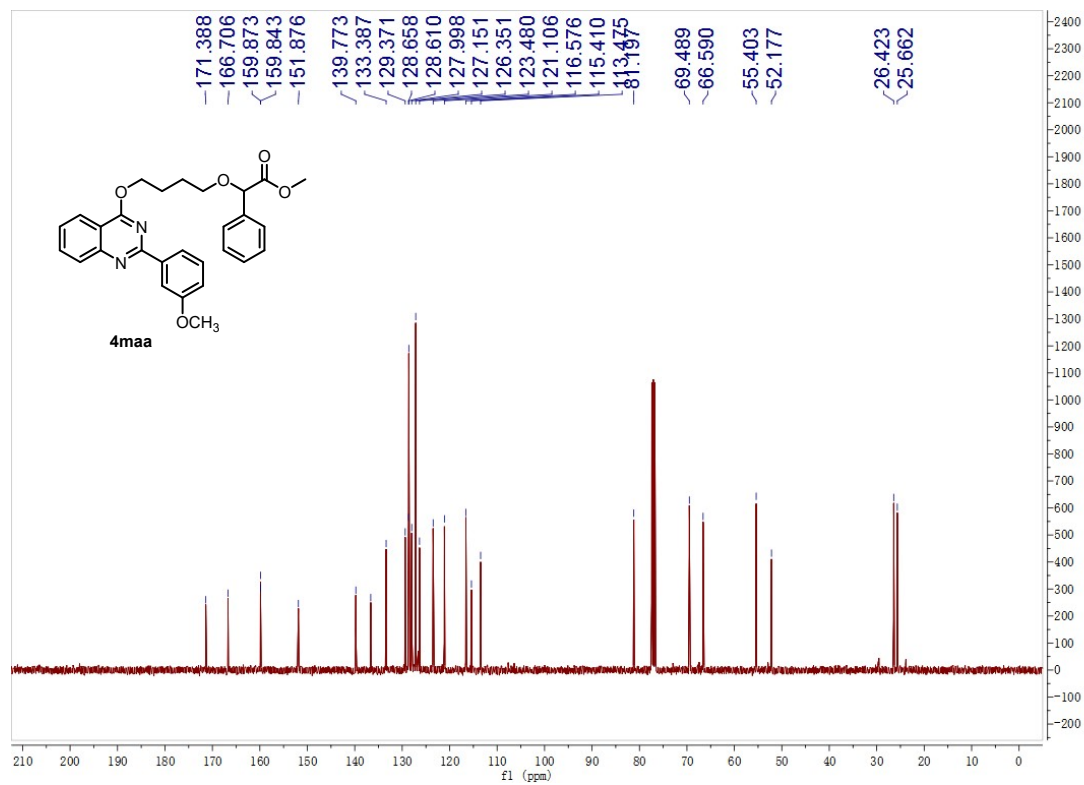



### <sup>1</sup>H-NMR of **4naa** (CDCl<sub>3</sub>, 400 Hz)

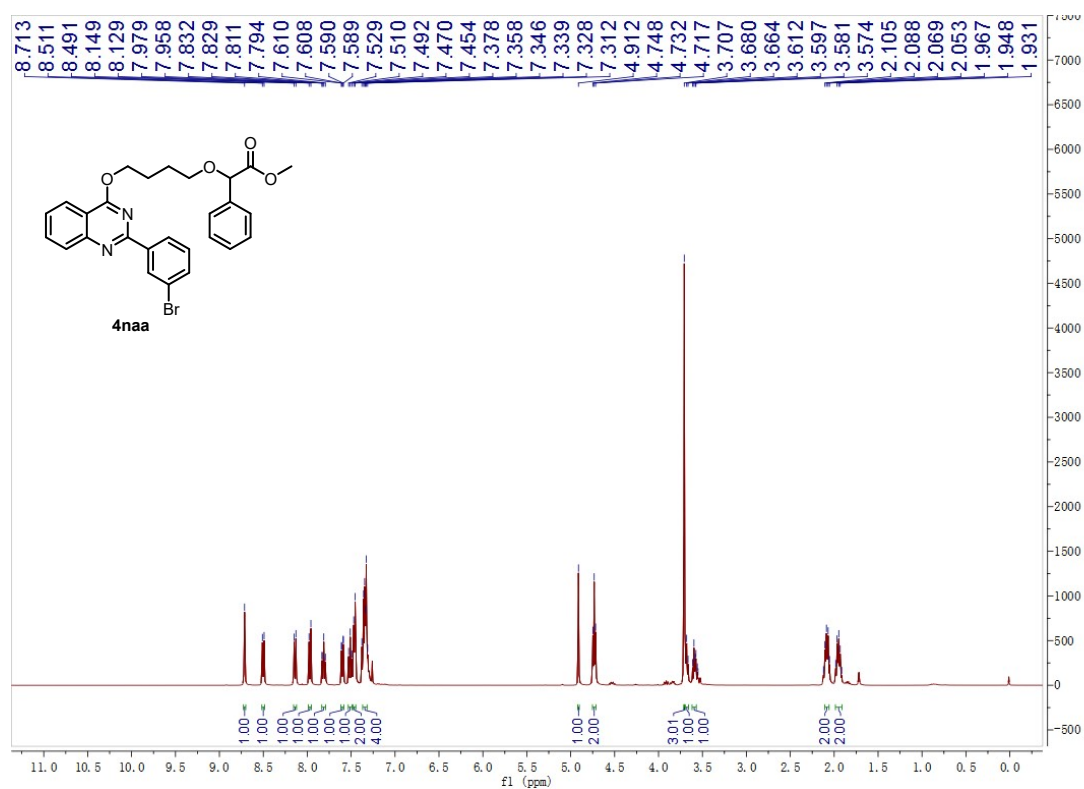

### <sup>13</sup>C-NMR of **4naa** (CDCl<sub>3</sub>, 100 Hz)

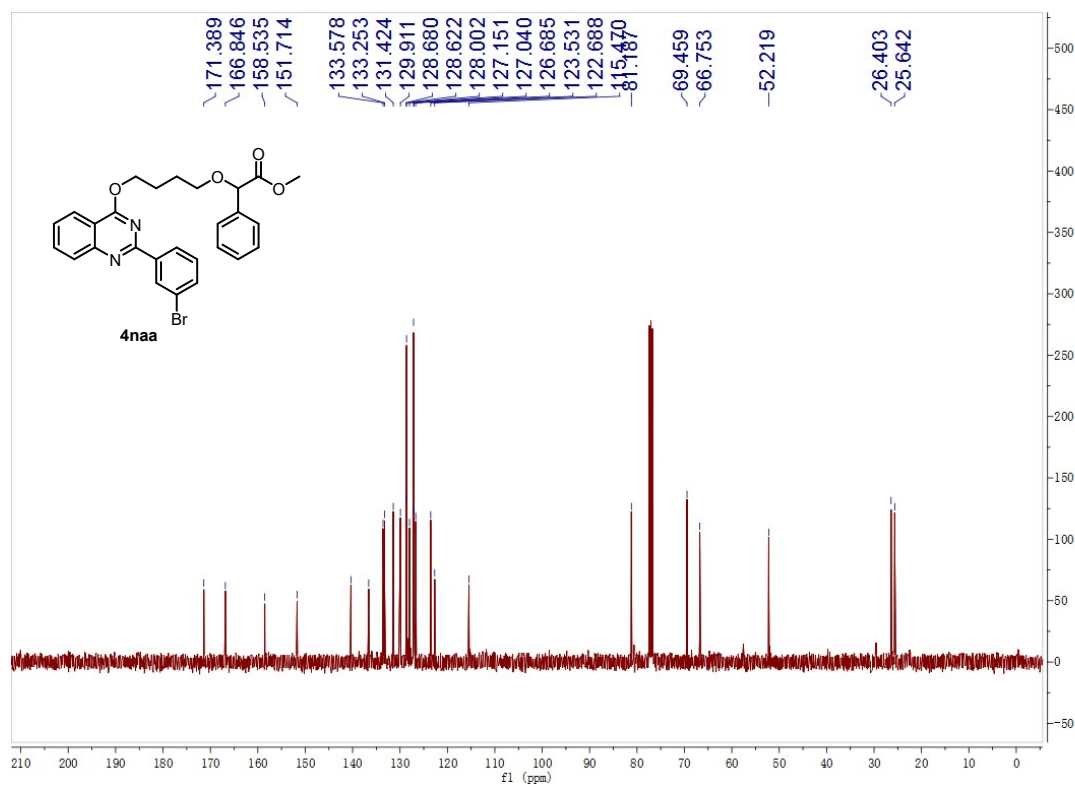

### <sup>1</sup>H-NMR of **4oaa** (CDCl<sub>3</sub>, 400 Hz)

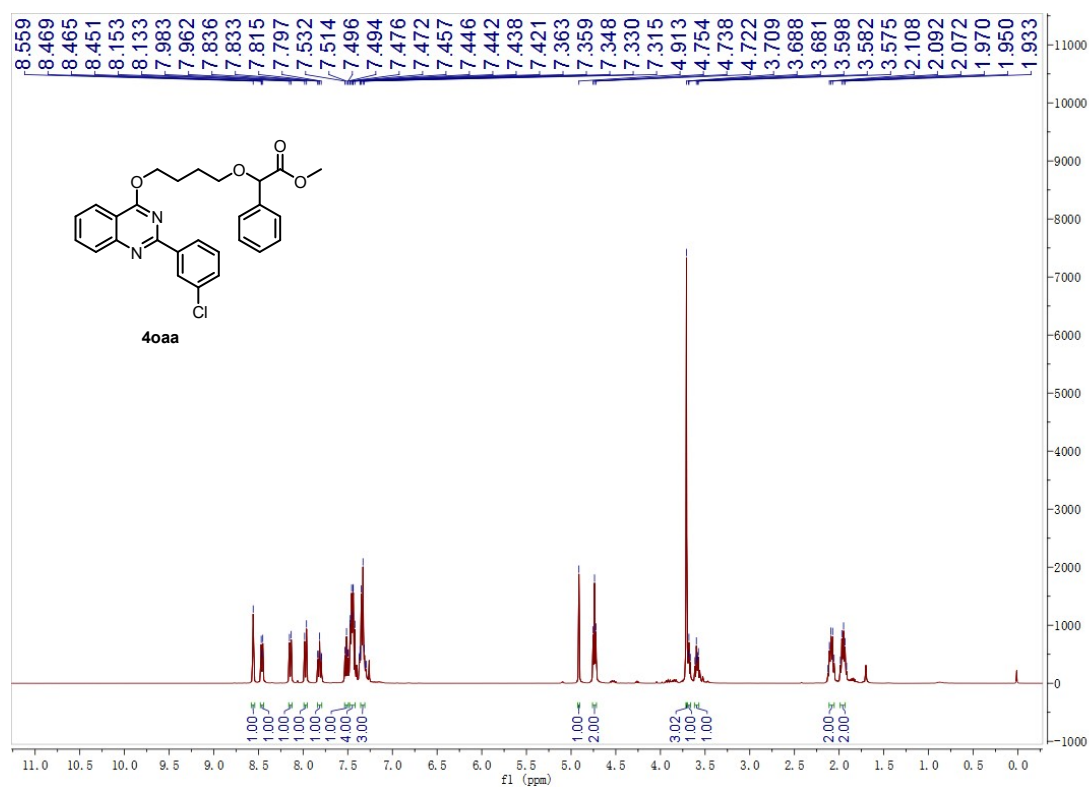

### <sup>13</sup>C-NMR of **4oaa** (CDCl<sub>3</sub>, 100 Hz)

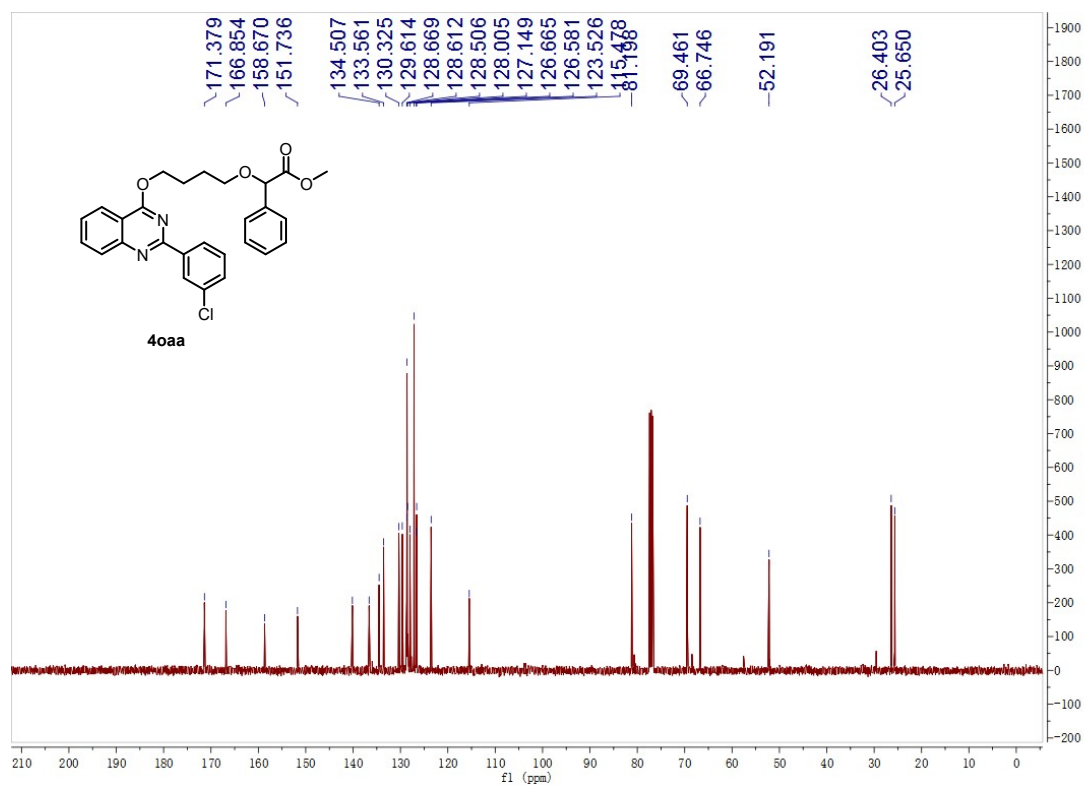

### <sup>1</sup>H-NMR of **4paa** (CDCl<sub>3</sub>, 400 Hz)

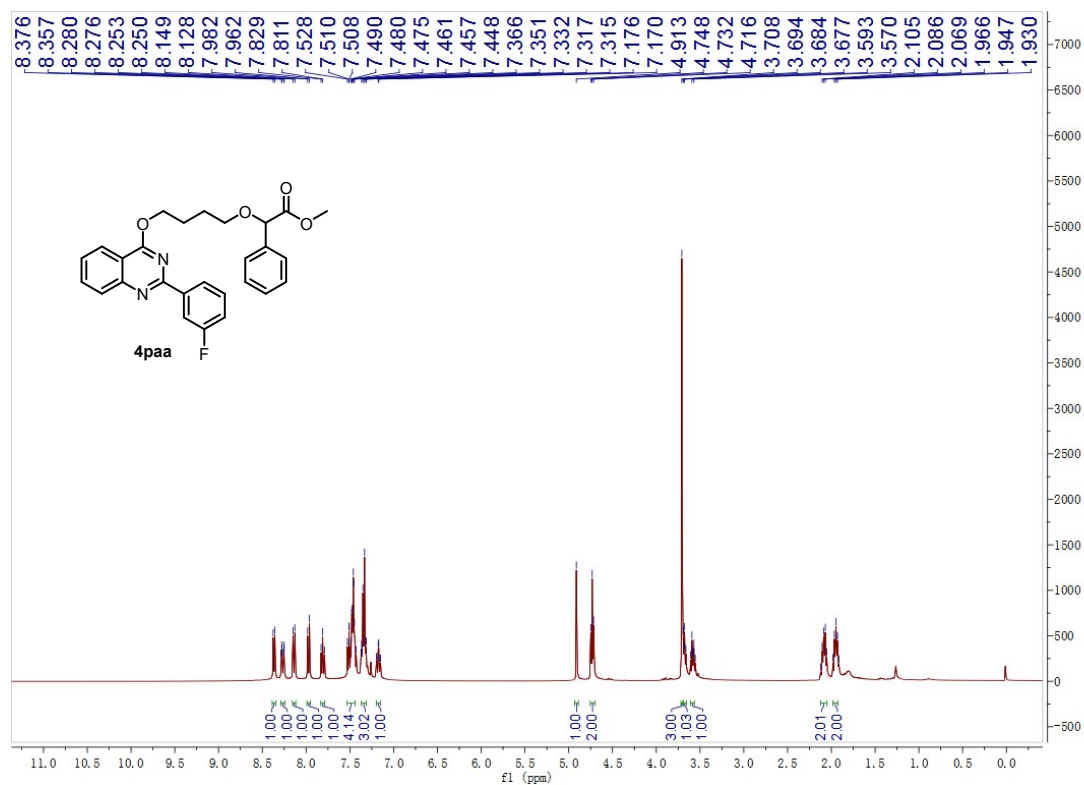

### <sup>13</sup>C-NMR of **4paa** (CDCl<sub>3</sub>, 100 Hz)

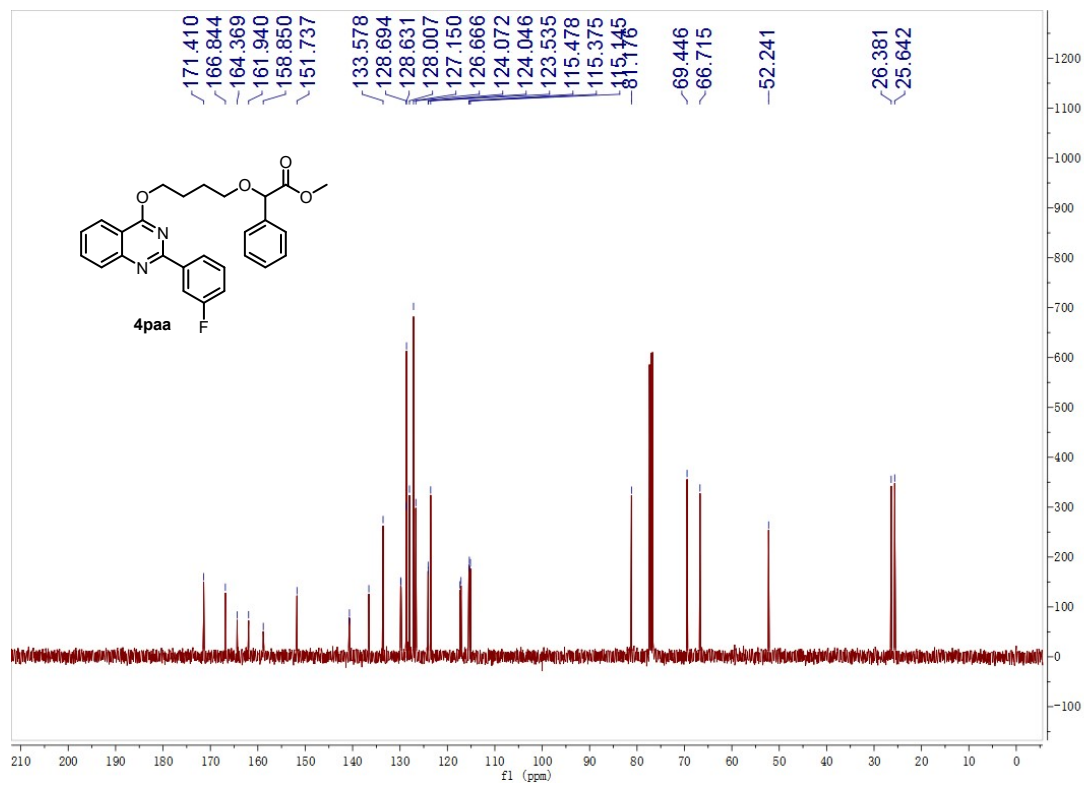

<sup>19</sup>F-NMR of **4paa** (CDCl<sub>3</sub>, 376 Hz)

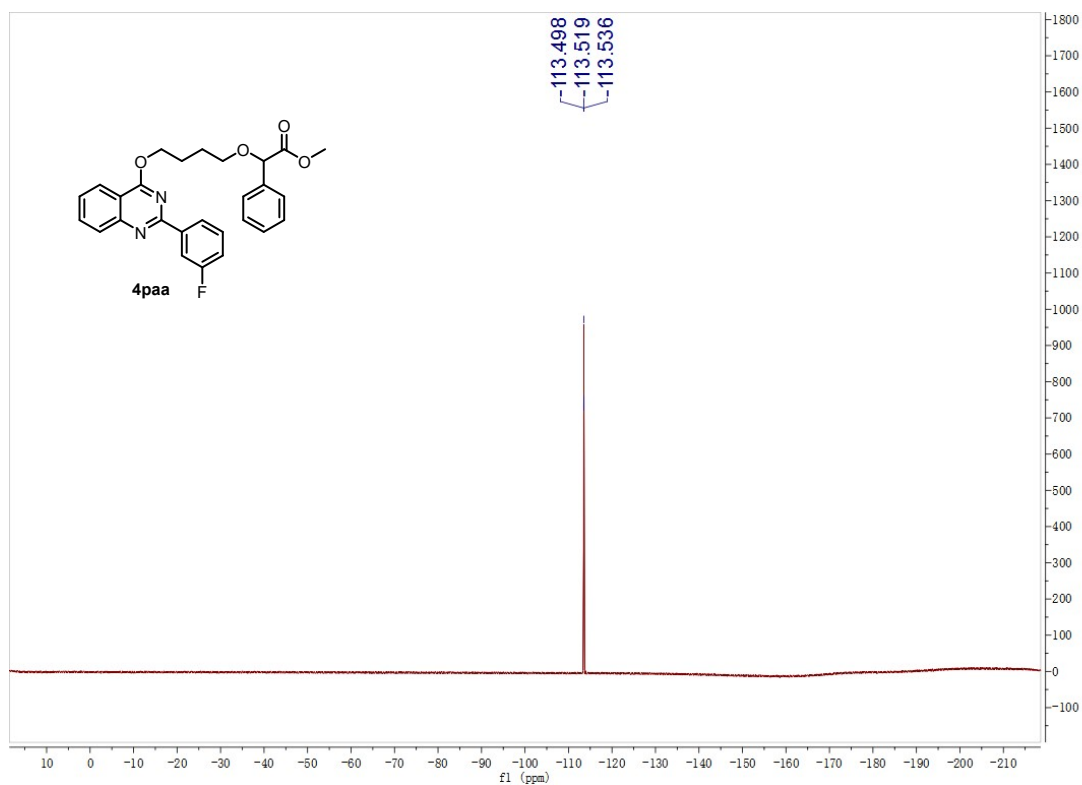

<sup>1</sup>H-NMR of **4qaa** (CDCl<sub>3</sub>, 400 Hz)

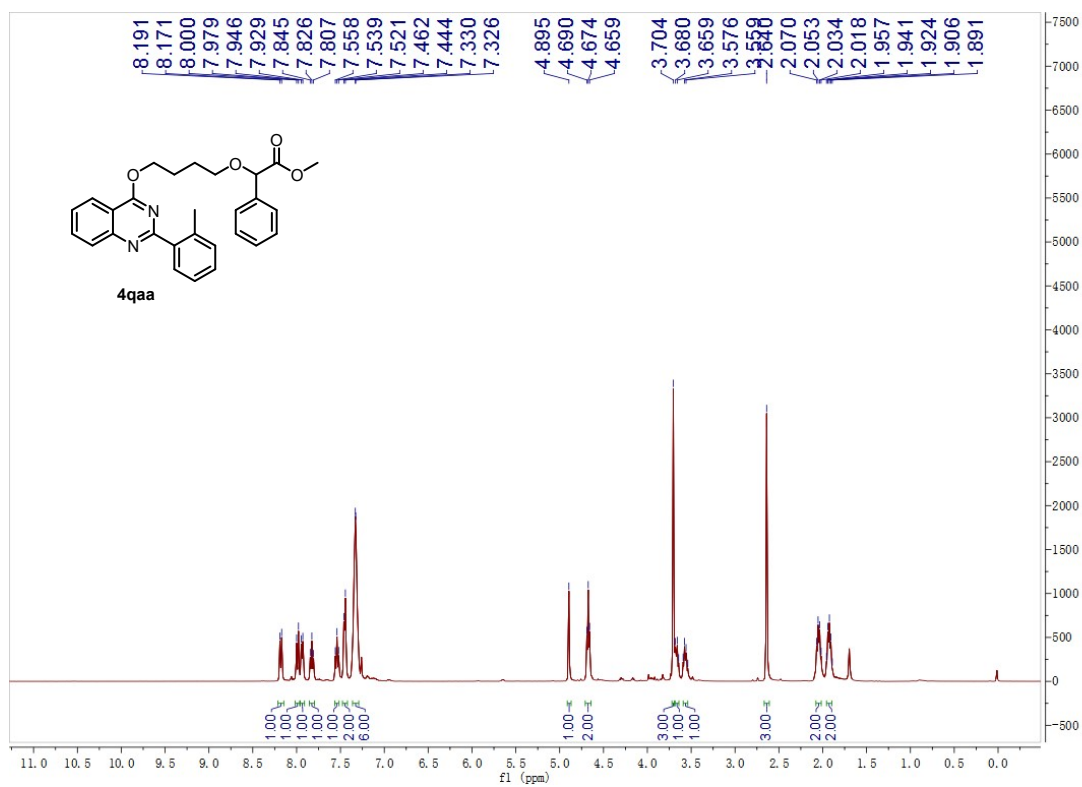

<sup>13</sup>C-NMR of **4qaa** (CDCl<sub>3</sub>, 100 Hz)

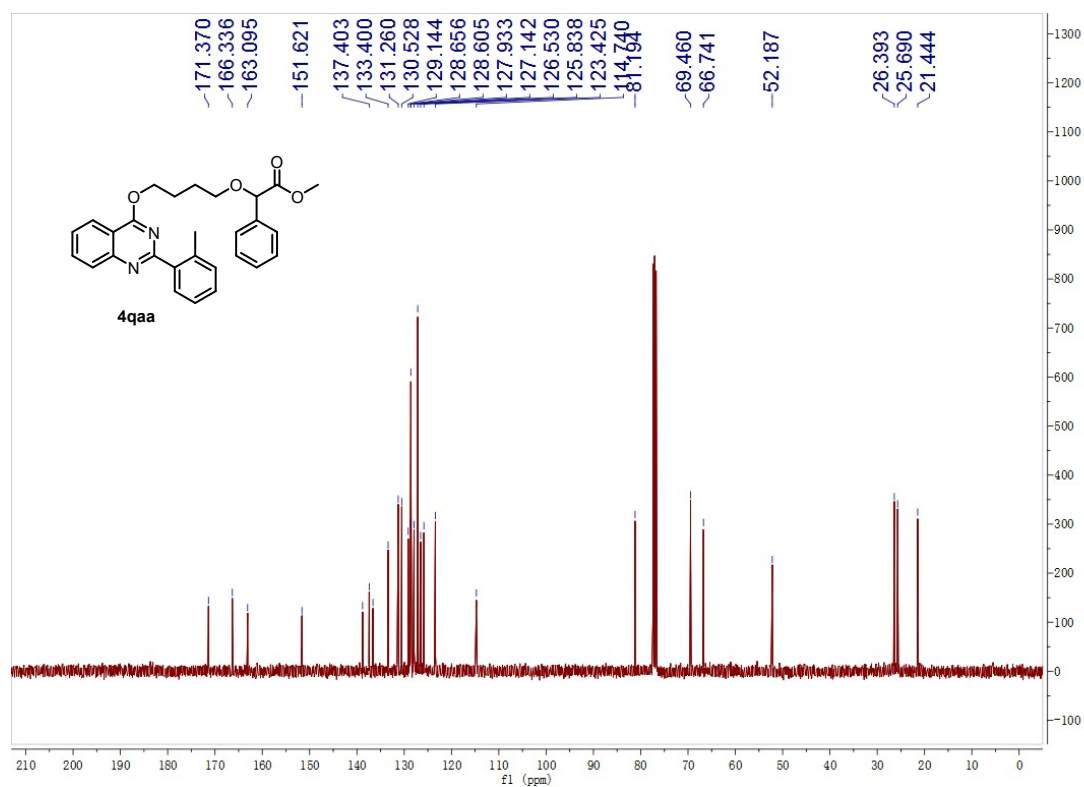

<sup>1</sup>H-NMR of **4raa** (CDCl<sub>3</sub>, 400 Hz)

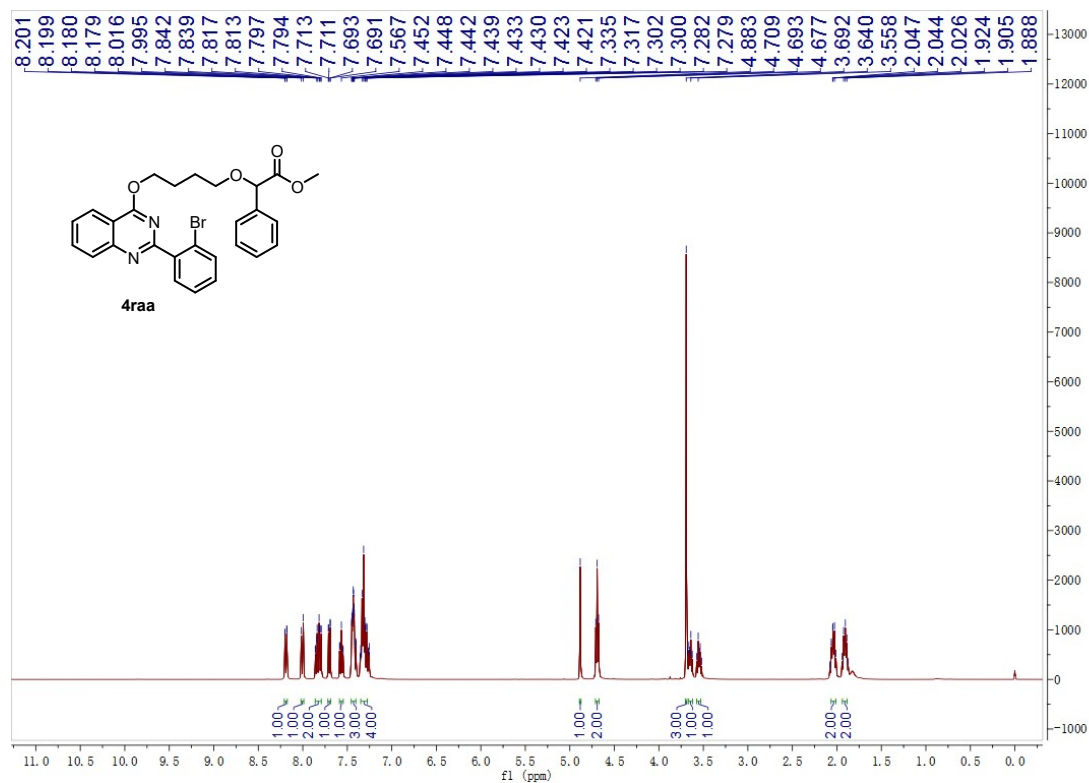

<sup>13</sup>C-NMR of **4raa** (CDCl<sub>3</sub>, 100 Hz)

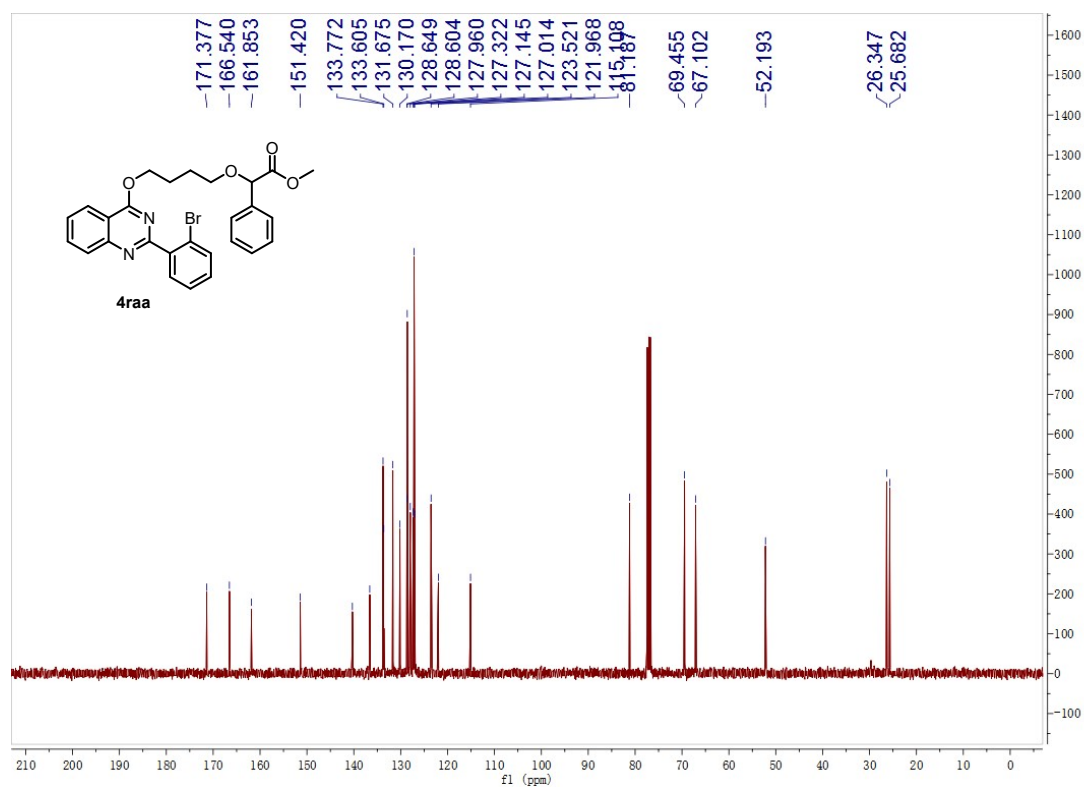

<sup>1</sup>H-NMR of **4saa** (CDCl<sub>3</sub>, 400 Hz)

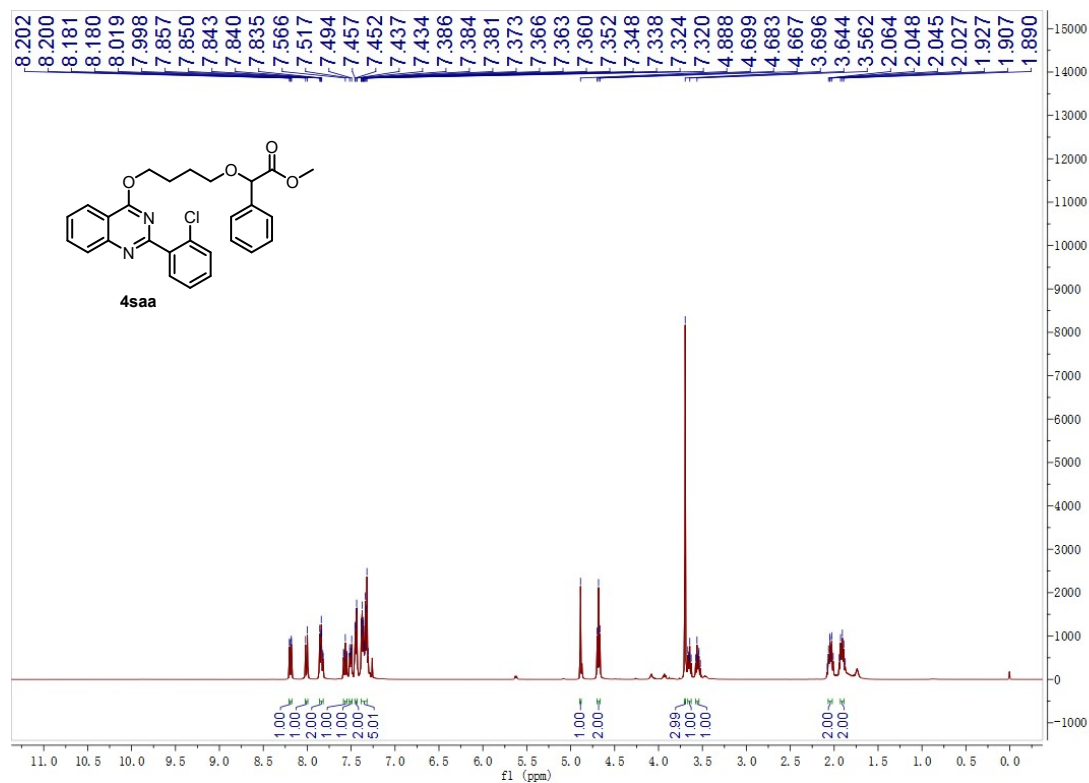

<sup>13</sup>C-NMR of **4saa** (CDCl<sub>3</sub>, 100 Hz)

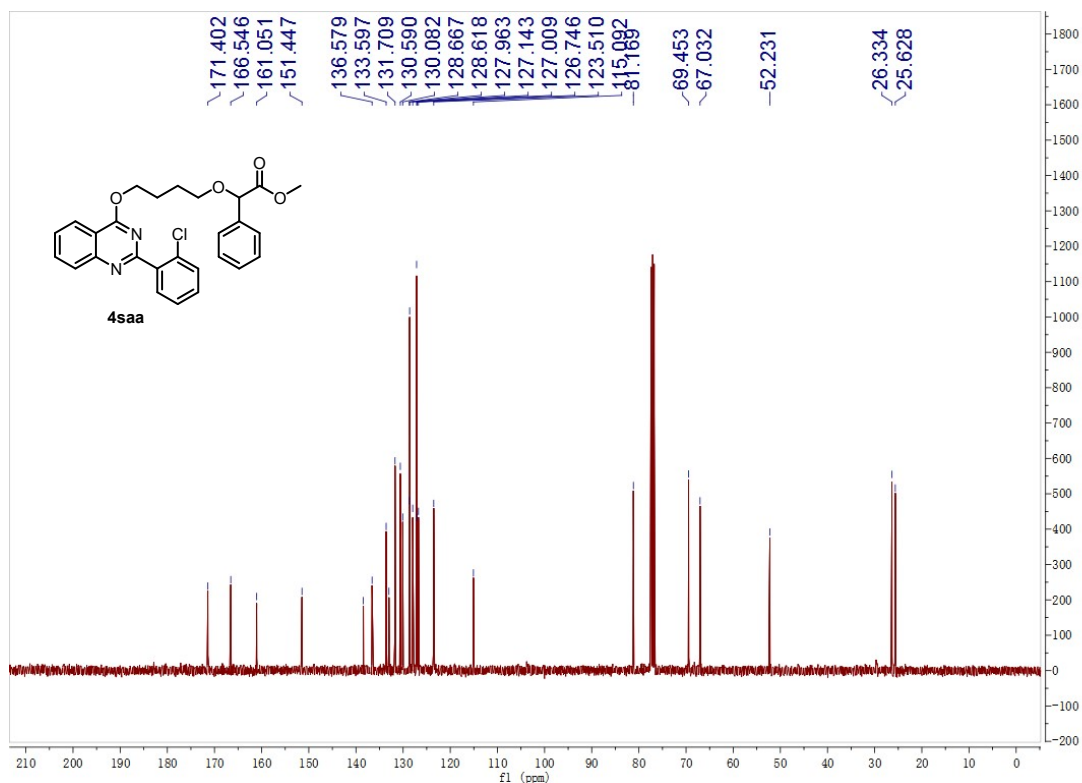

<sup>1</sup>H-NMR of **4taa** (CDCl<sub>3</sub>, 400 Hz)

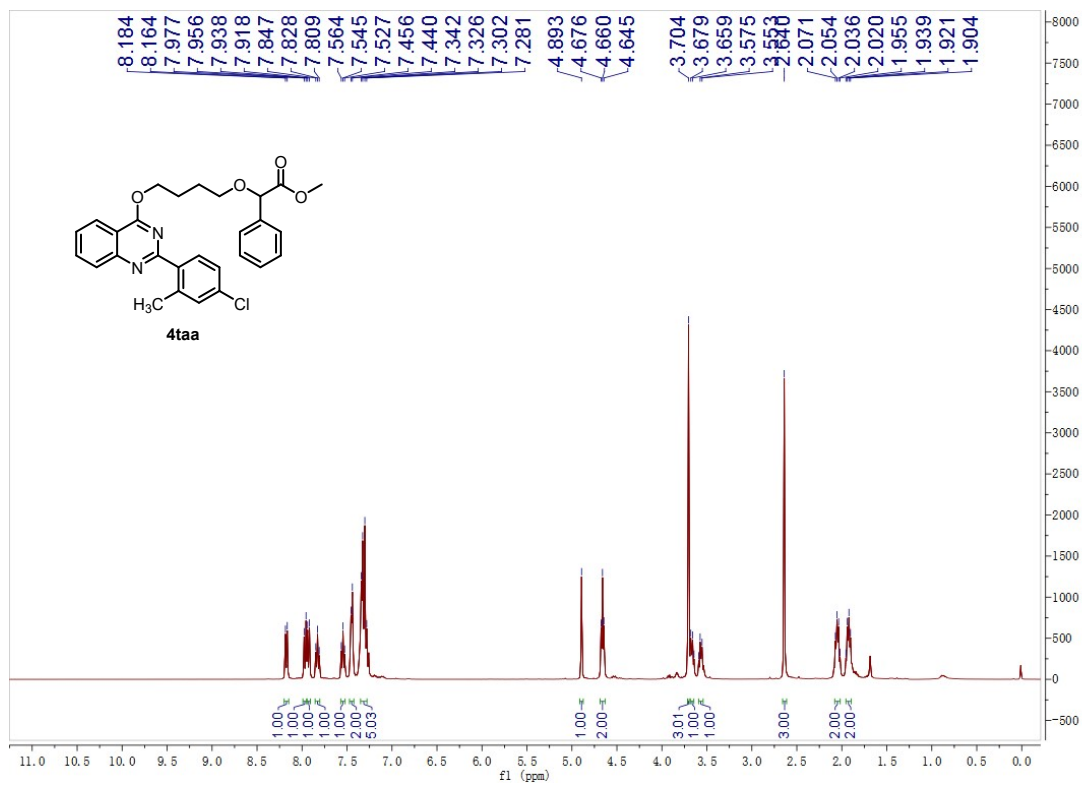

<sup>13</sup>C-NMR of **4taa** (CDCl<sub>3</sub>, 100 Hz)

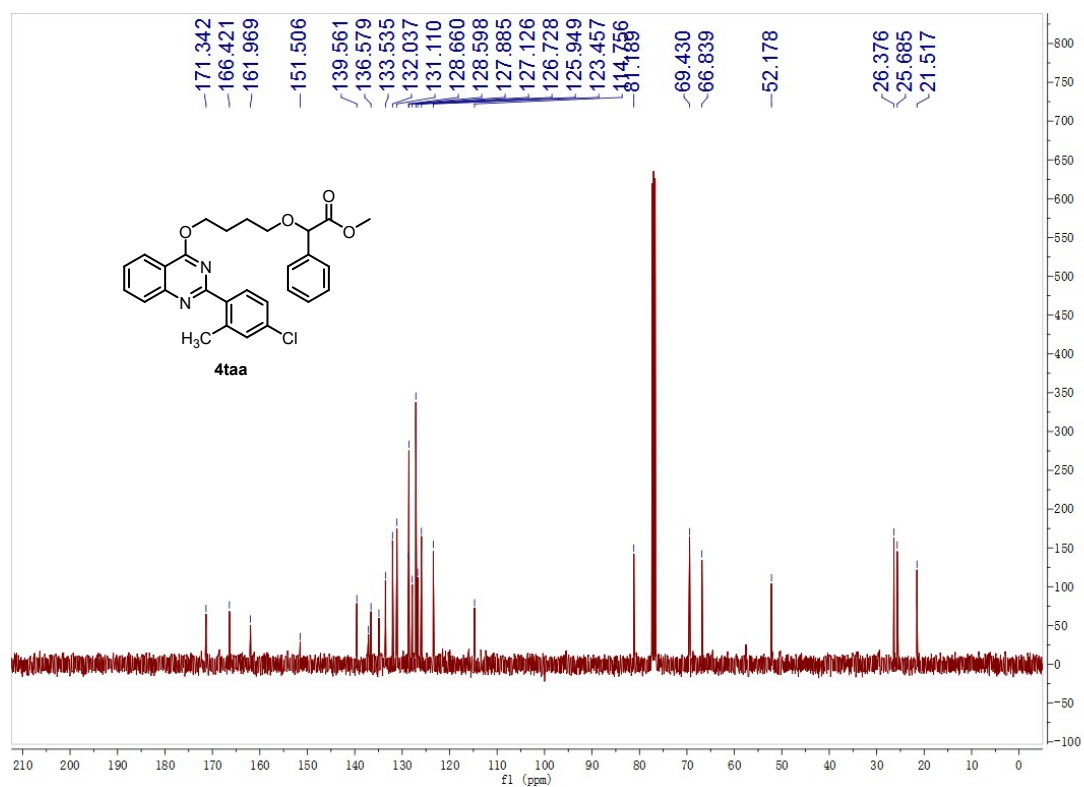

<sup>1</sup>H-NMR of **4u<sub>1</sub>aa** (CDCl<sub>3</sub>, 400 Hz)

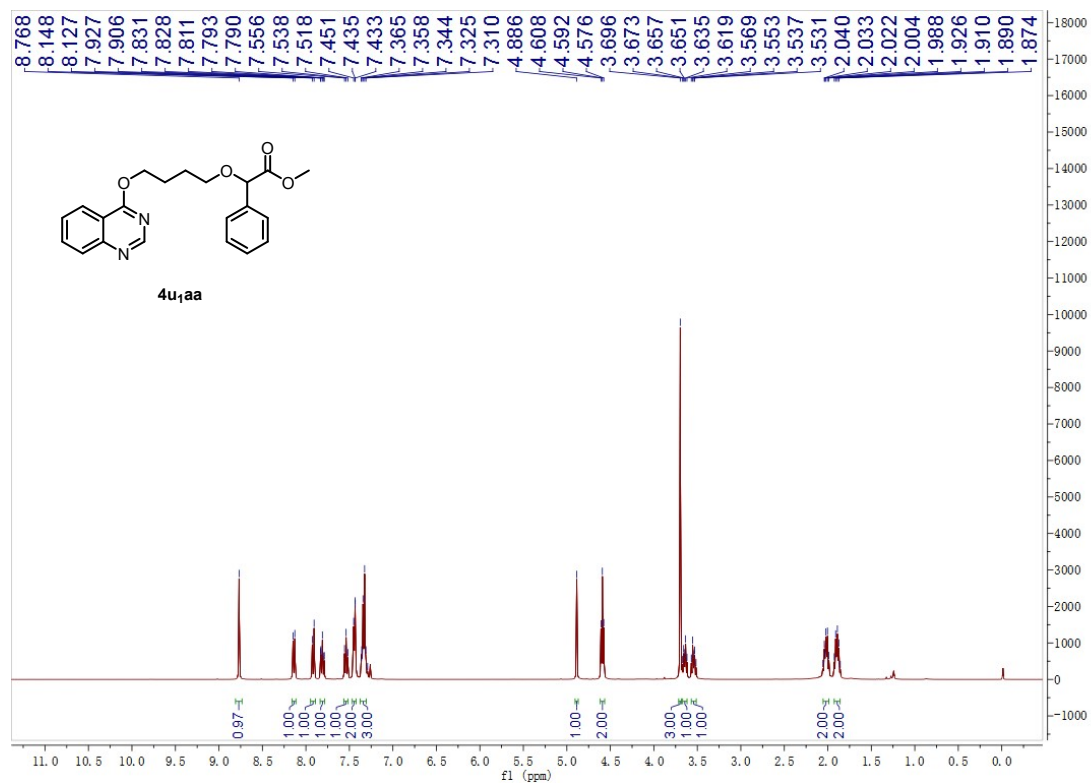



<sup>13</sup>C-NMR of **4u<sub>1</sub>aa** (CDCl<sub>3</sub>, 100 Hz)

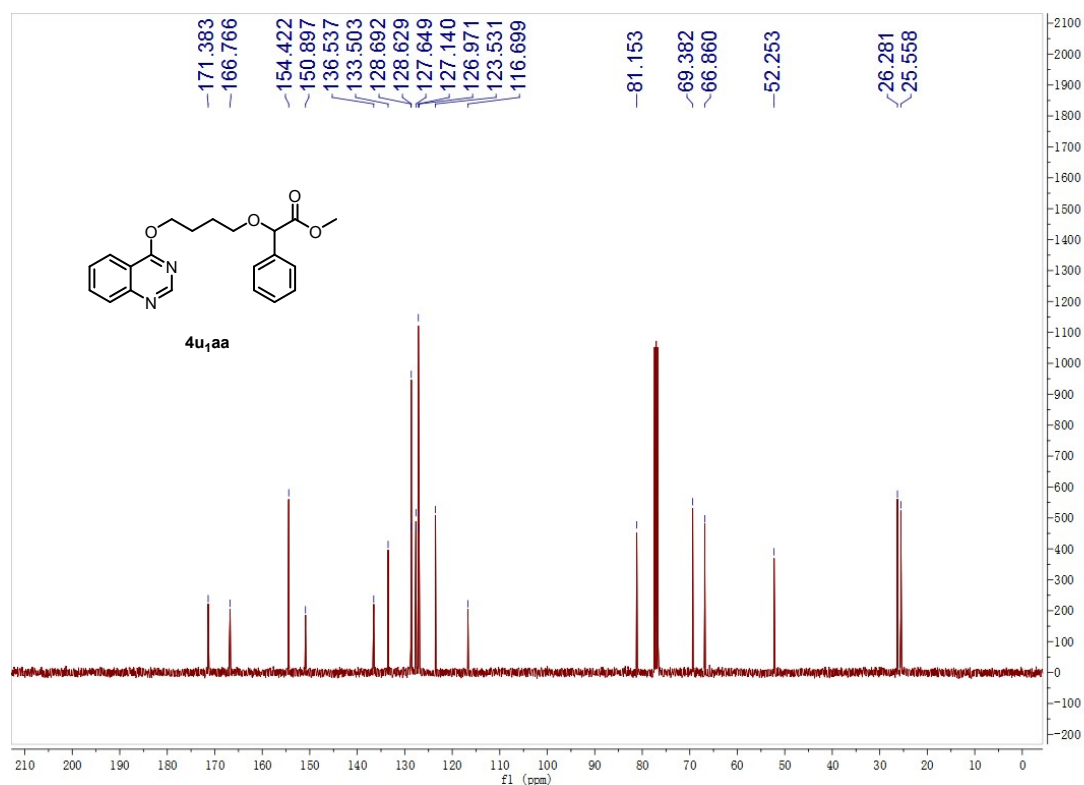

<sup>1</sup>H-NMR of **4u<sub>2</sub>aa** (CDCl<sub>3</sub>, 400 Hz)

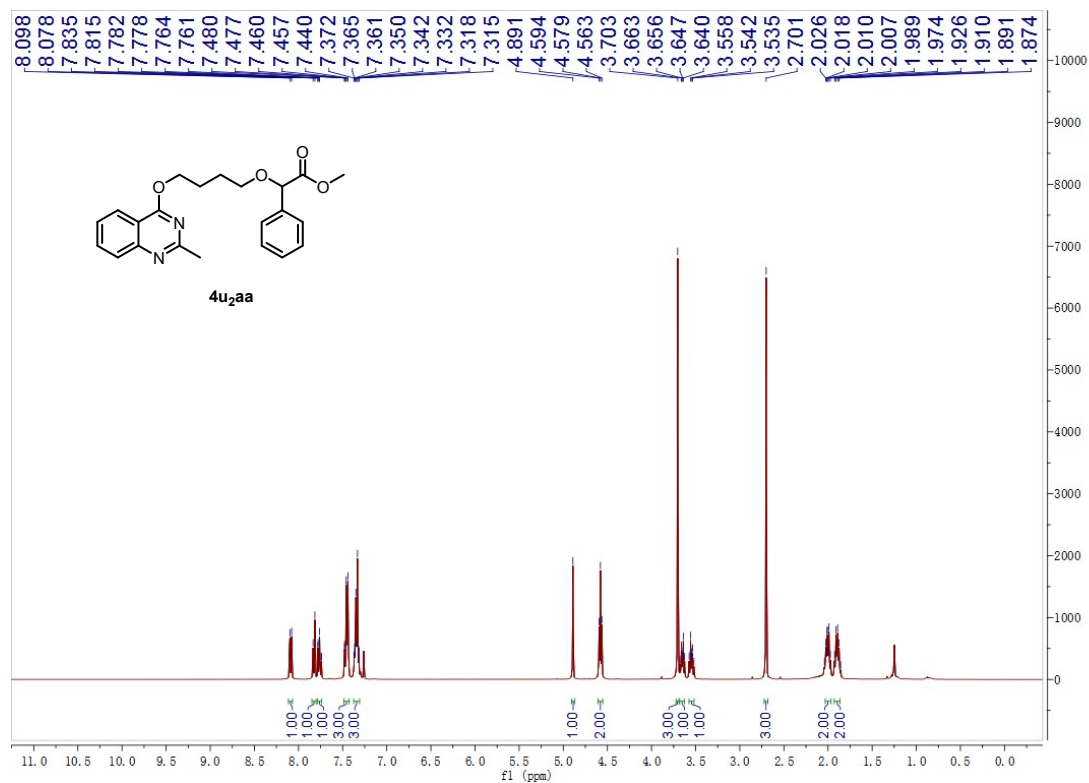

<sup>13</sup>C-NMR of **4u<sub>2</sub>aa** (CDCl<sub>3</sub>, 100 Hz)

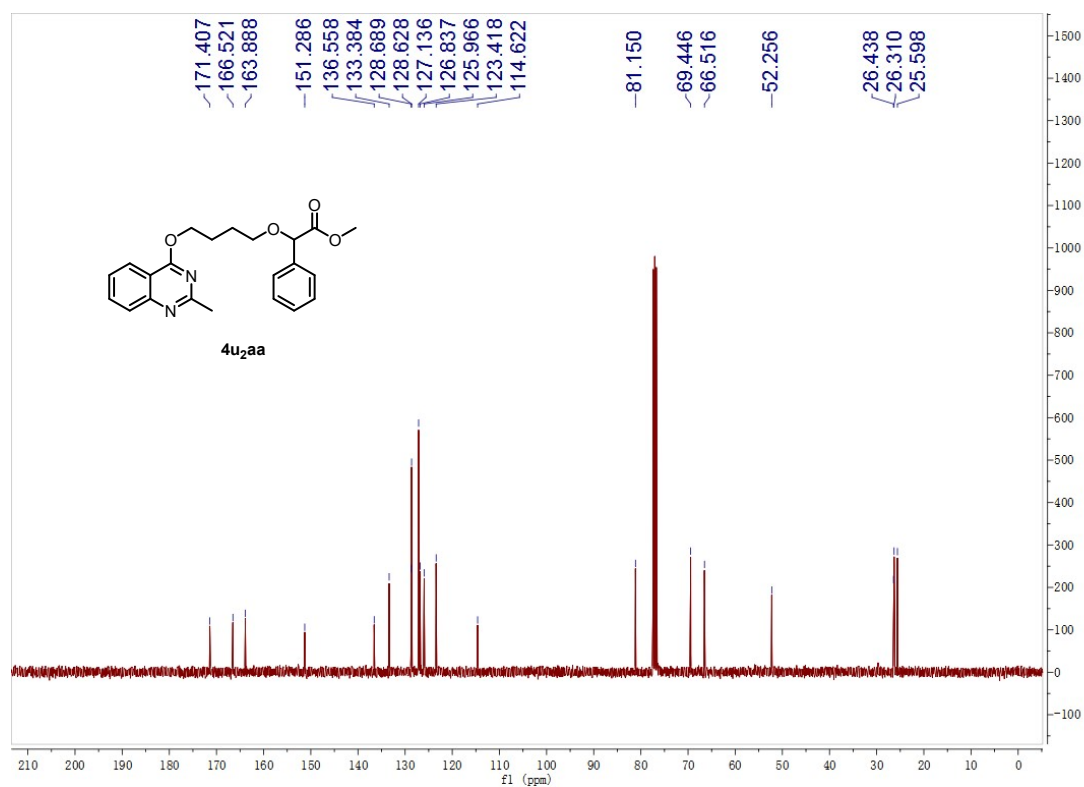

<sup>1</sup>H-NMR of **4u<sub>3</sub>aa** (CDCl<sub>3</sub>, 400 Hz)

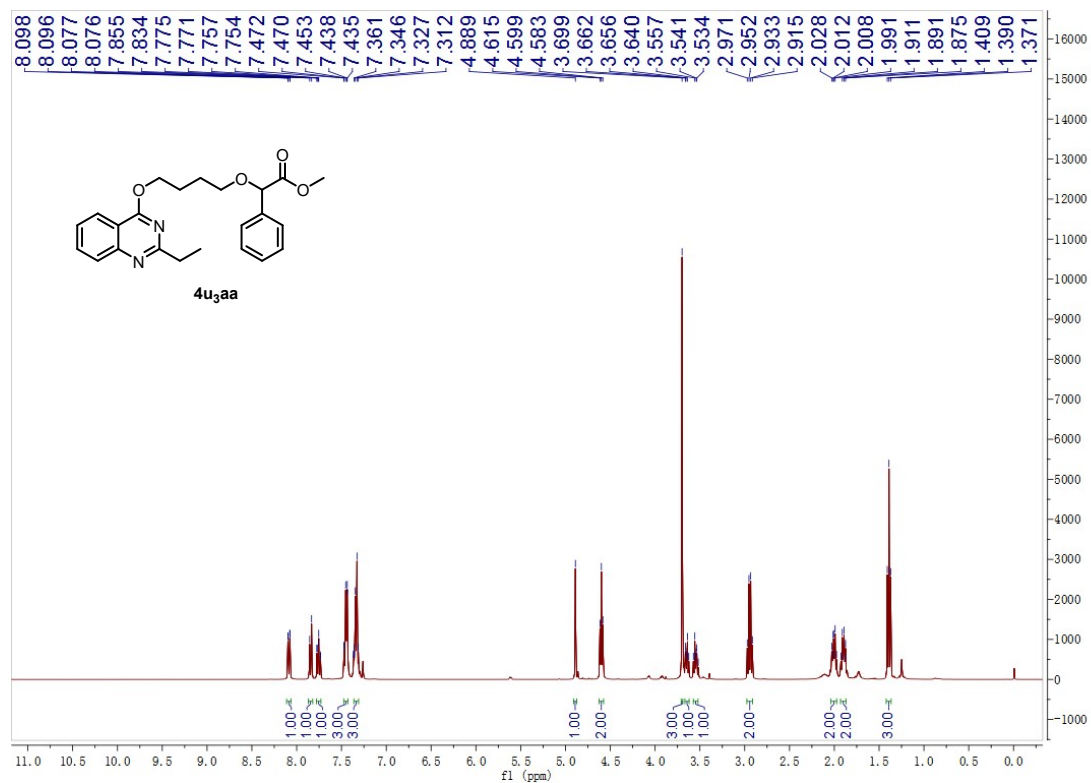

<sup>13</sup>C-NMR of **4u<sub>3</sub>aa** (CDCl<sub>3</sub>, 100 Hz)

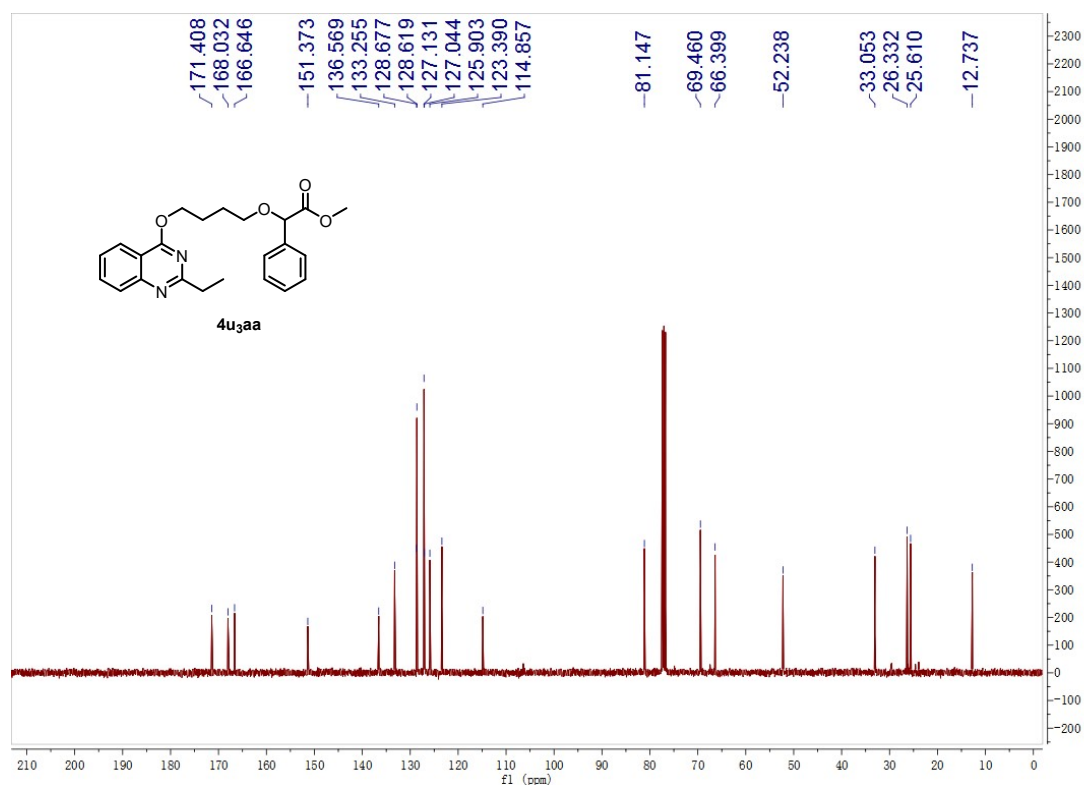

<sup>1</sup>H-NMR of **4v<sub>1</sub>aa** (CDCl<sub>3</sub>, 400 Hz)

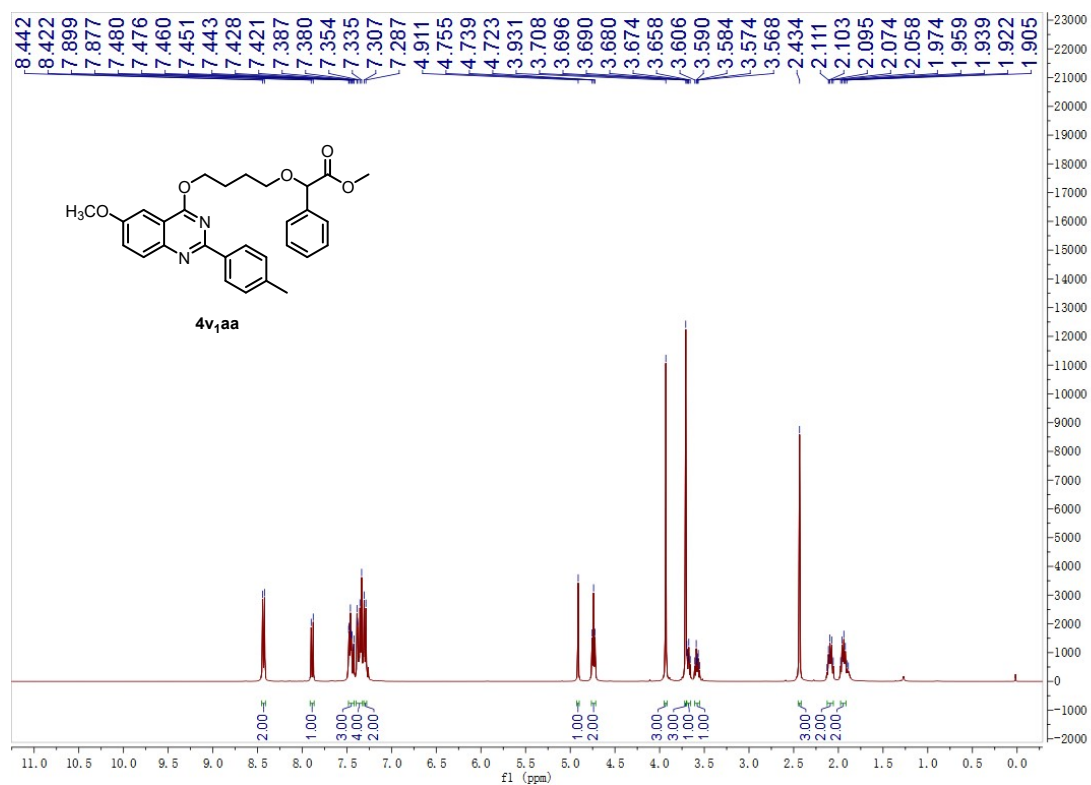

<sup>13</sup>C-NMR of **4v<sub>1</sub>aa** (CDCl<sub>3</sub>, 100 Hz)

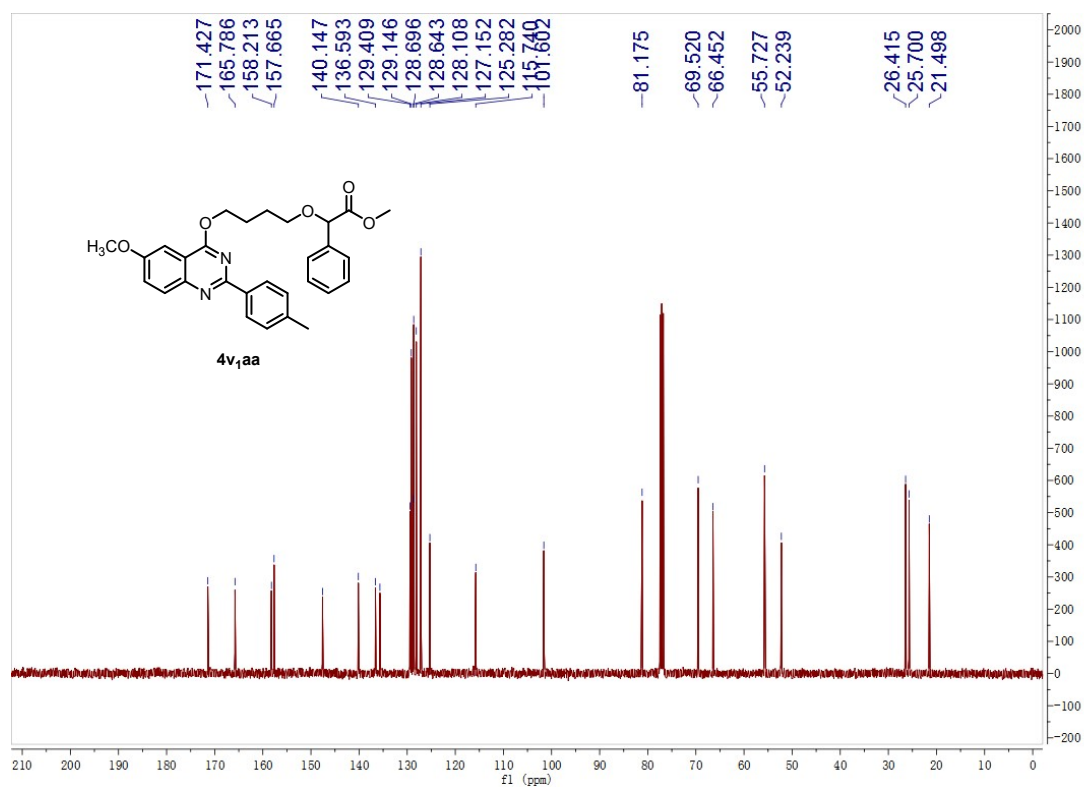

<sup>1</sup>H-NMR of **4v<sub>2</sub>aa** (CDCl<sub>3</sub>, 400 Hz)

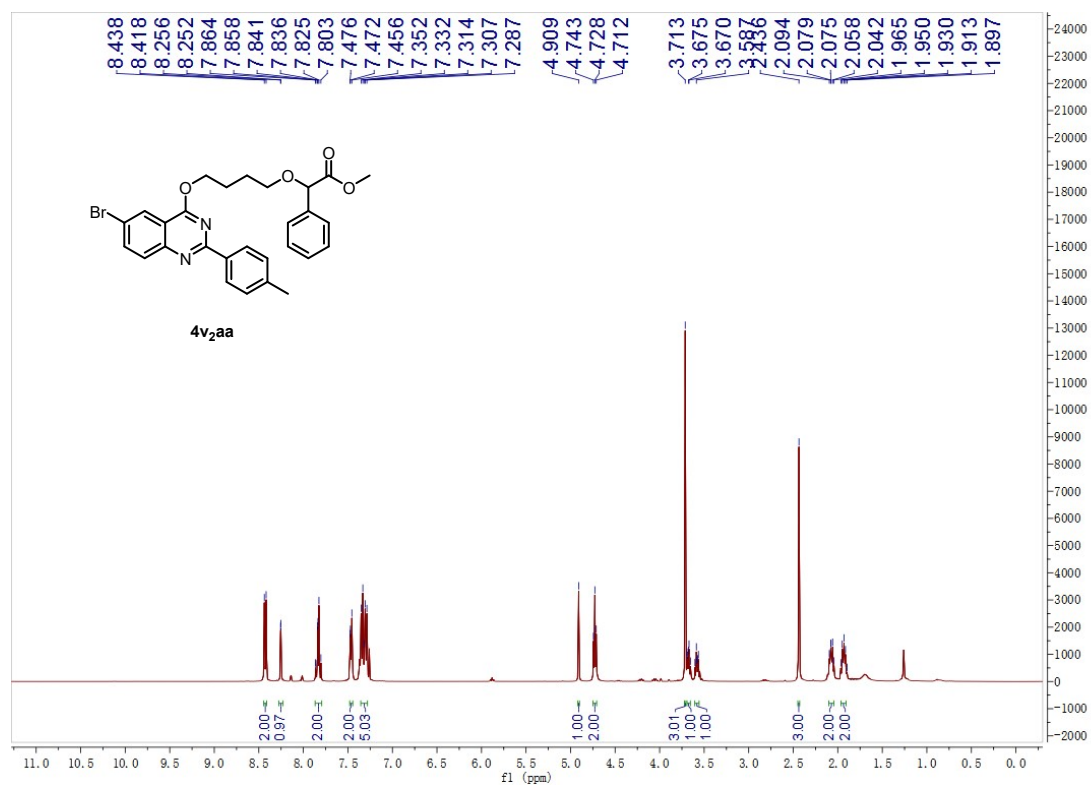

<sup>13</sup>C-NMR of **4v<sub>2</sub>aa** (CDCl<sub>3</sub>, 100 Hz)

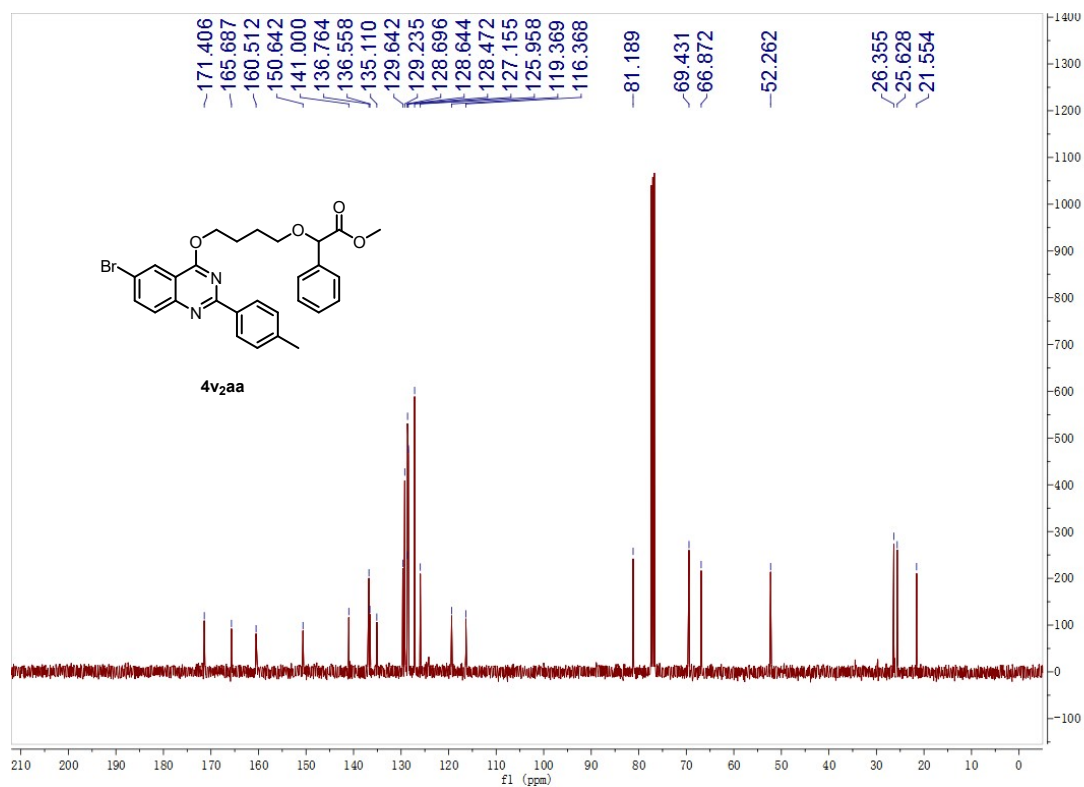

<sup>1</sup>H-NMR of **4v<sub>3</sub>aa** (CDCl<sub>3</sub>, 400 Hz)

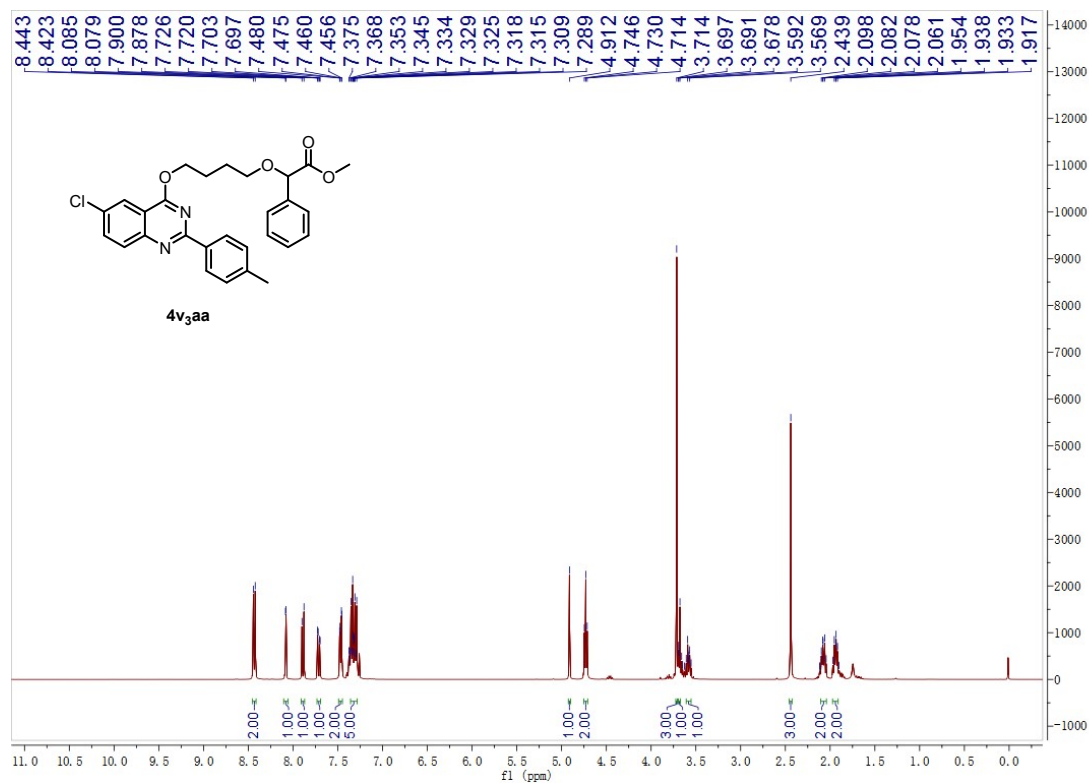

<sup>13</sup>C-NMR of **4v<sub>3</sub>aa** (CDCl<sub>3</sub>, 100 Hz)

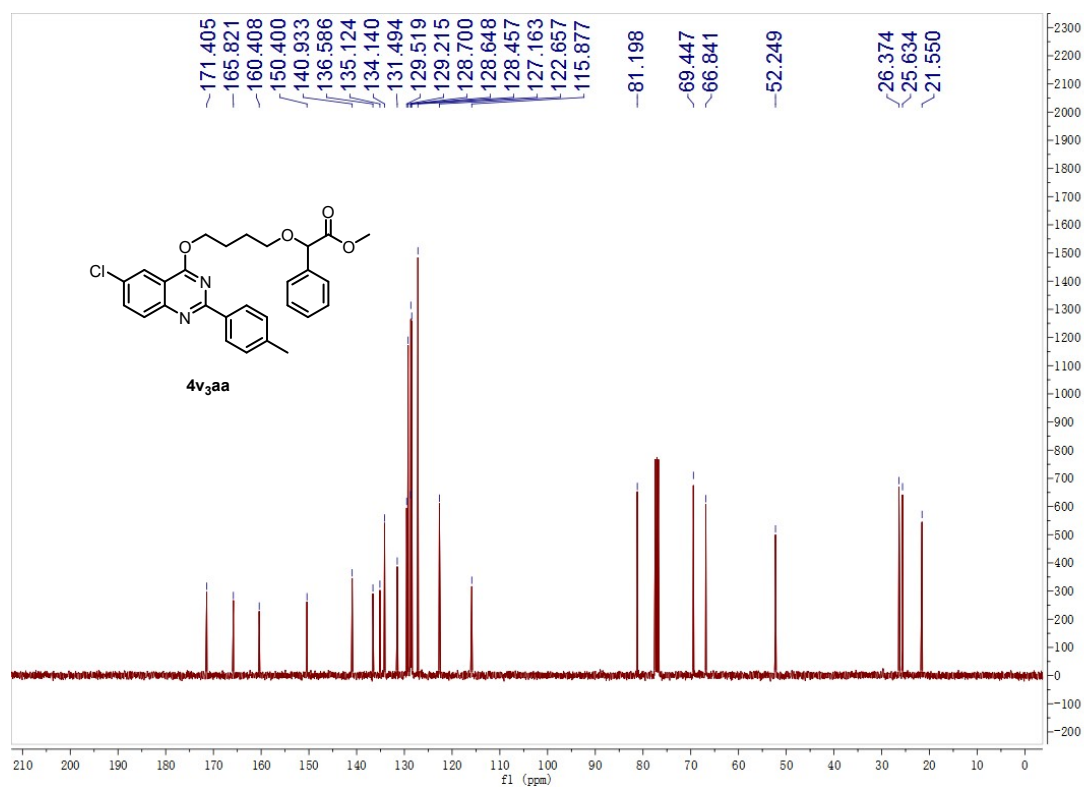

<sup>1</sup>H-NMR of **4v<sub>4</sub>aa** (CDCl<sub>3</sub>, 400 Hz)

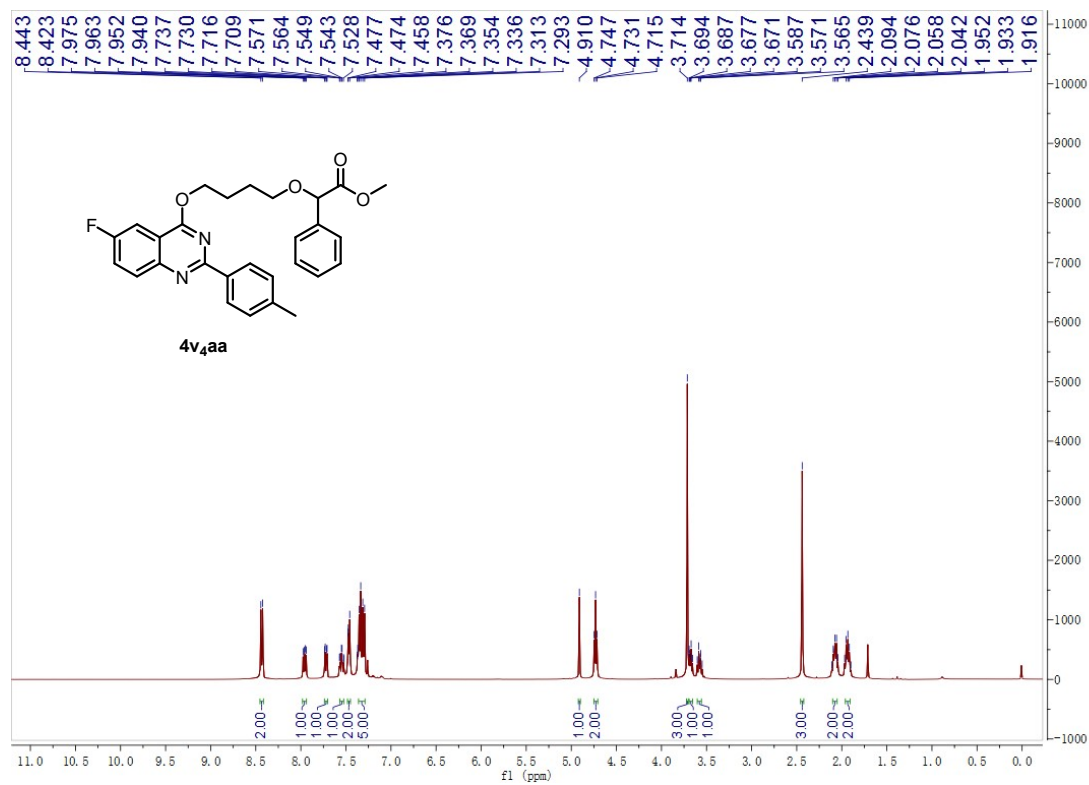

<sup>13</sup>C-NMR of **4v<sub>4</sub>aa** (CDCl<sub>3</sub>, 100 Hz)

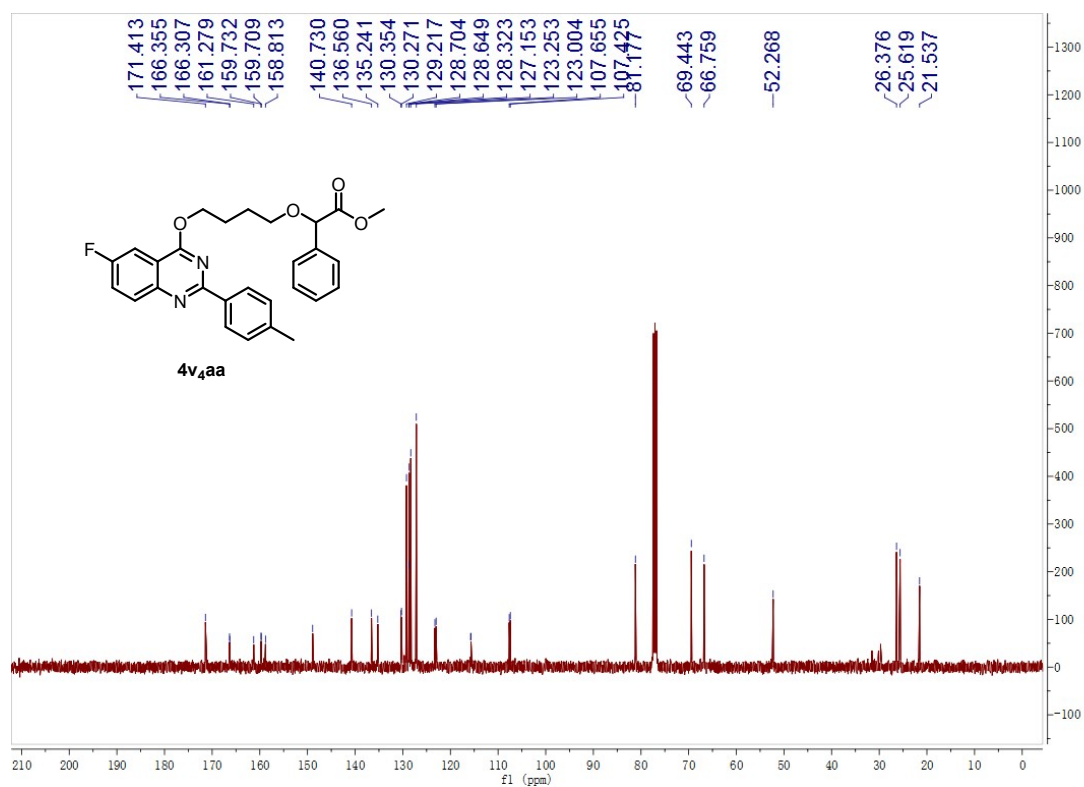

<sup>19</sup>F-NMR of **4v<sub>4</sub>aa** (CDCl<sub>3</sub>, 376 Hz)

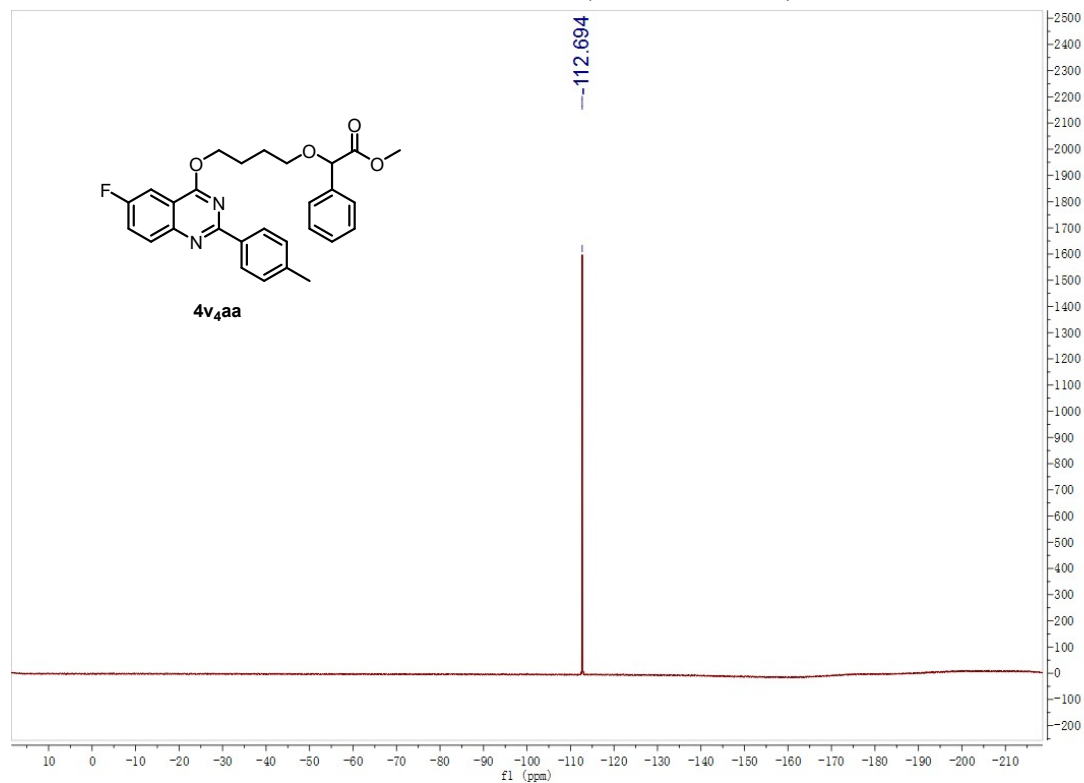

### <sup>1</sup>H-NMR of 4v<sub>5</sub>aa (CDCl<sub>3</sub>, 400 Hz)

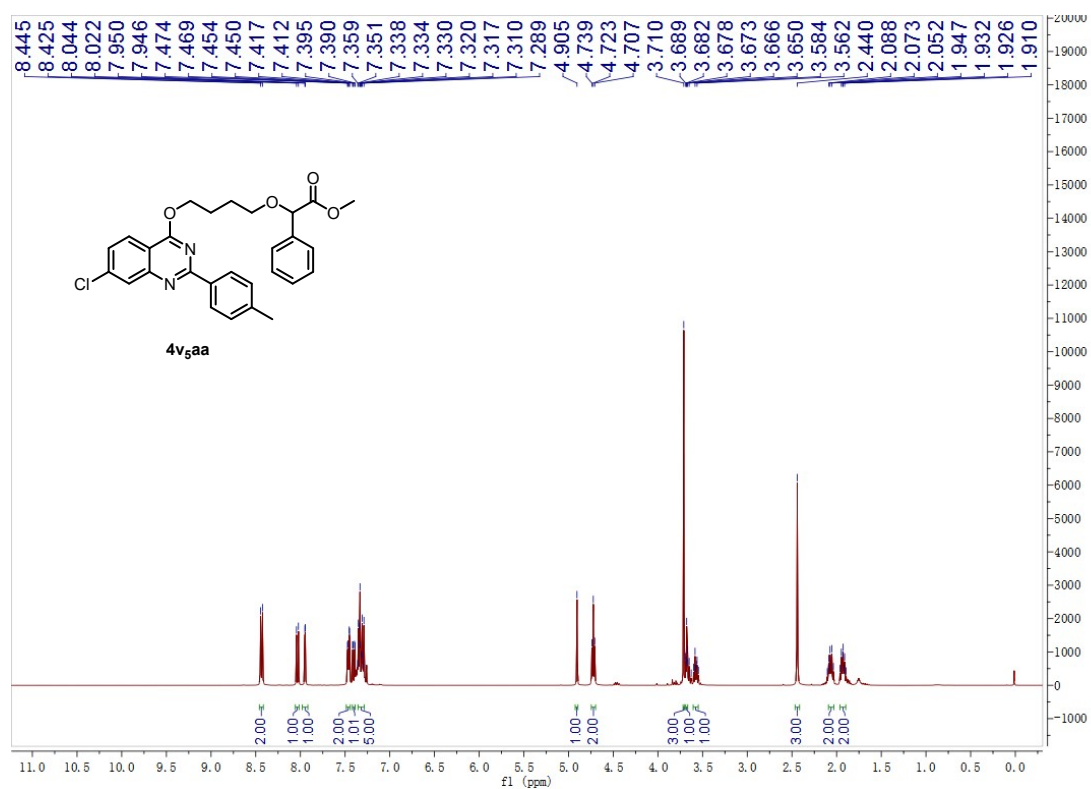

### <sup>13</sup>C-NMR of 4v<sub>5</sub>aa (CDCl<sub>3</sub>, 100 Hz)

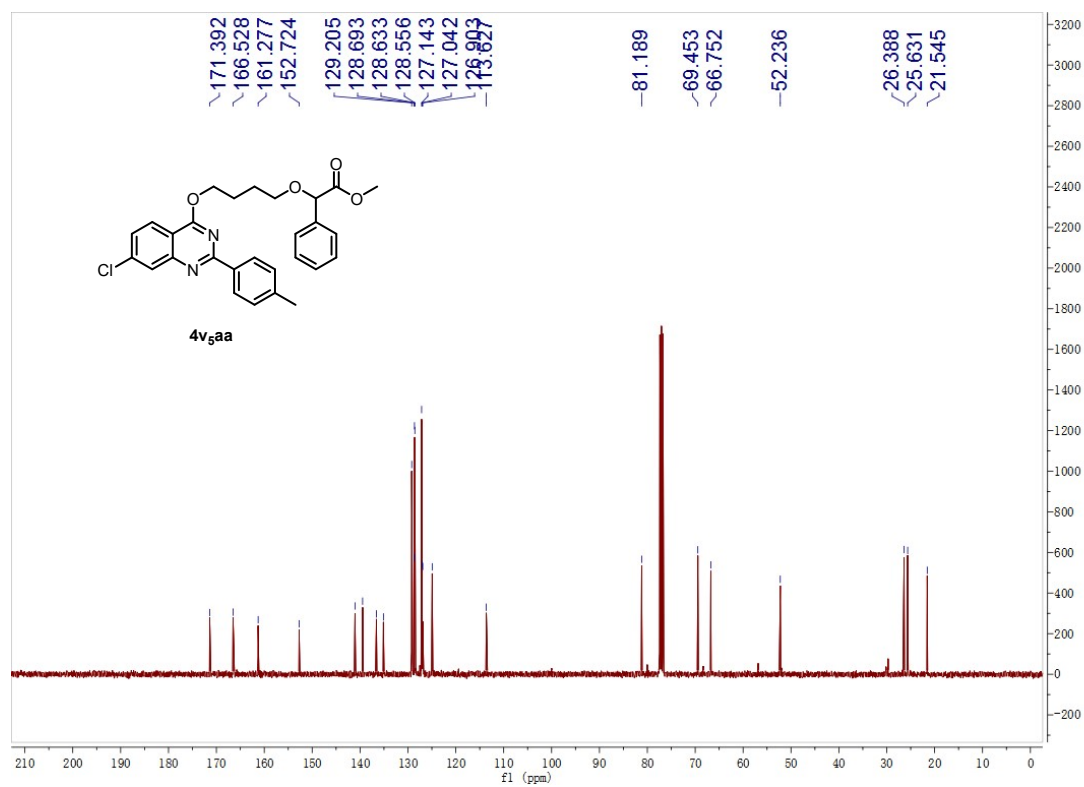



<sup>1</sup>H-NMR of 4v<sub>6</sub>aa (CDCl<sub>3</sub>, 400 Hz)

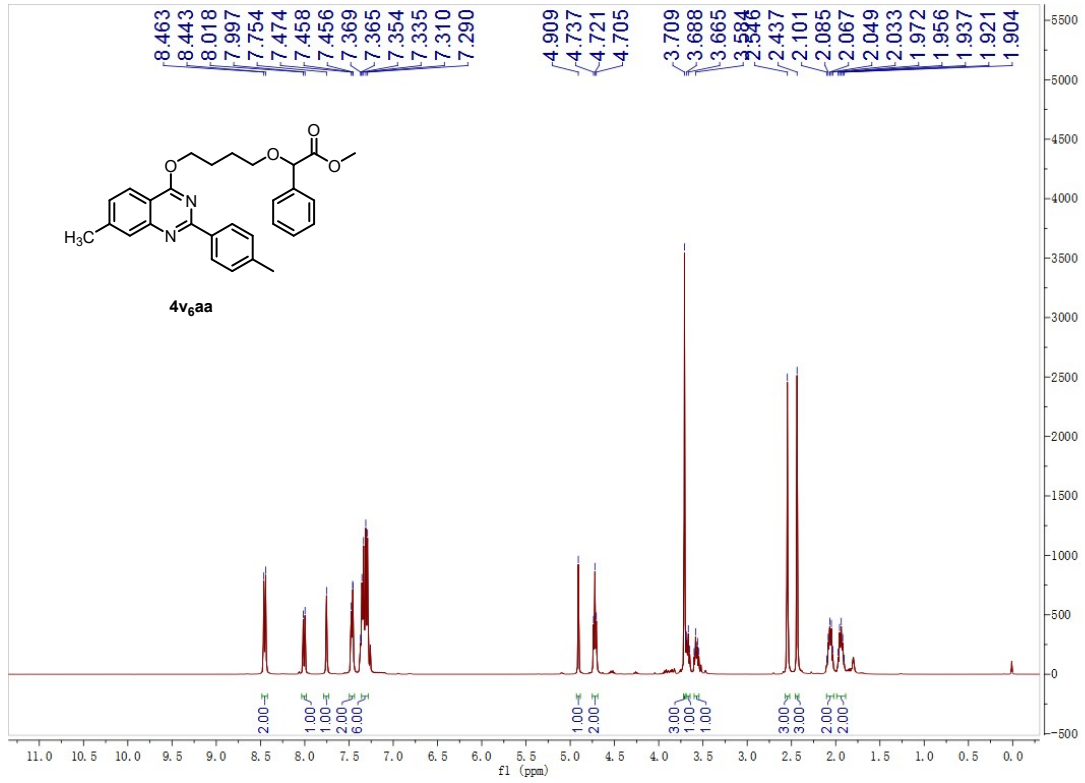

<sup>13</sup>C-NMR of 4v<sub>6</sub>aa (CDCl<sub>3</sub>, 100 Hz)

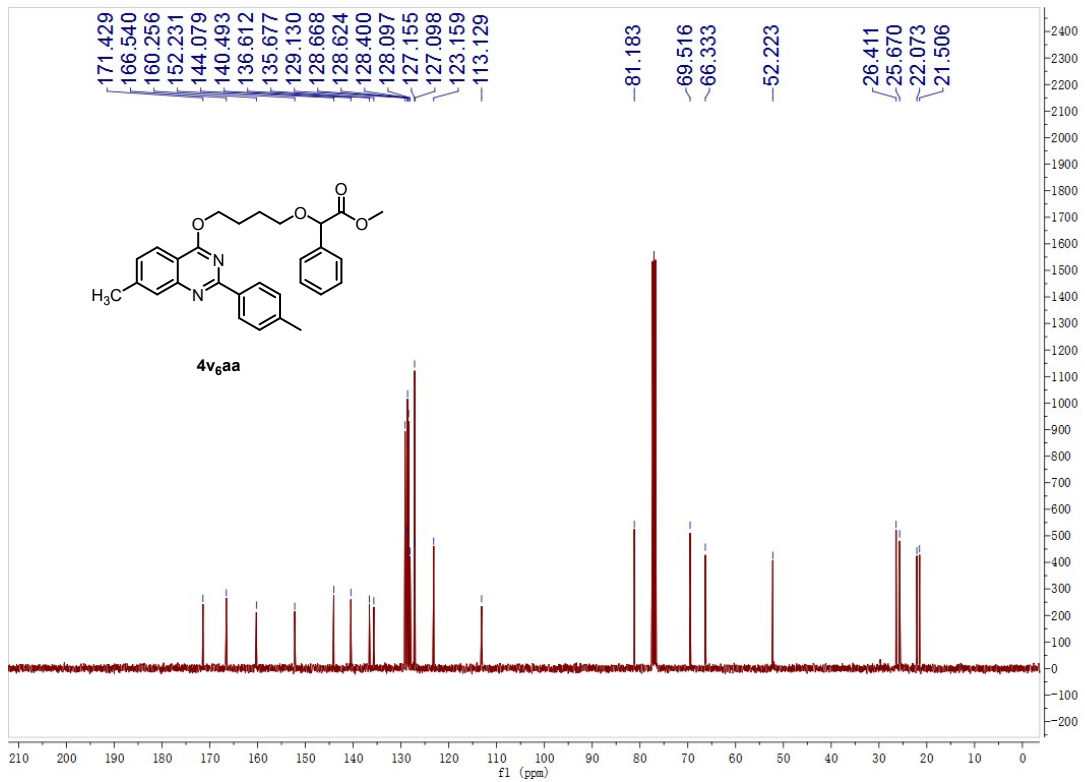

### <sup>1</sup>H-NMR of **4waa** (CDCl<sub>3</sub>, 400 Hz)

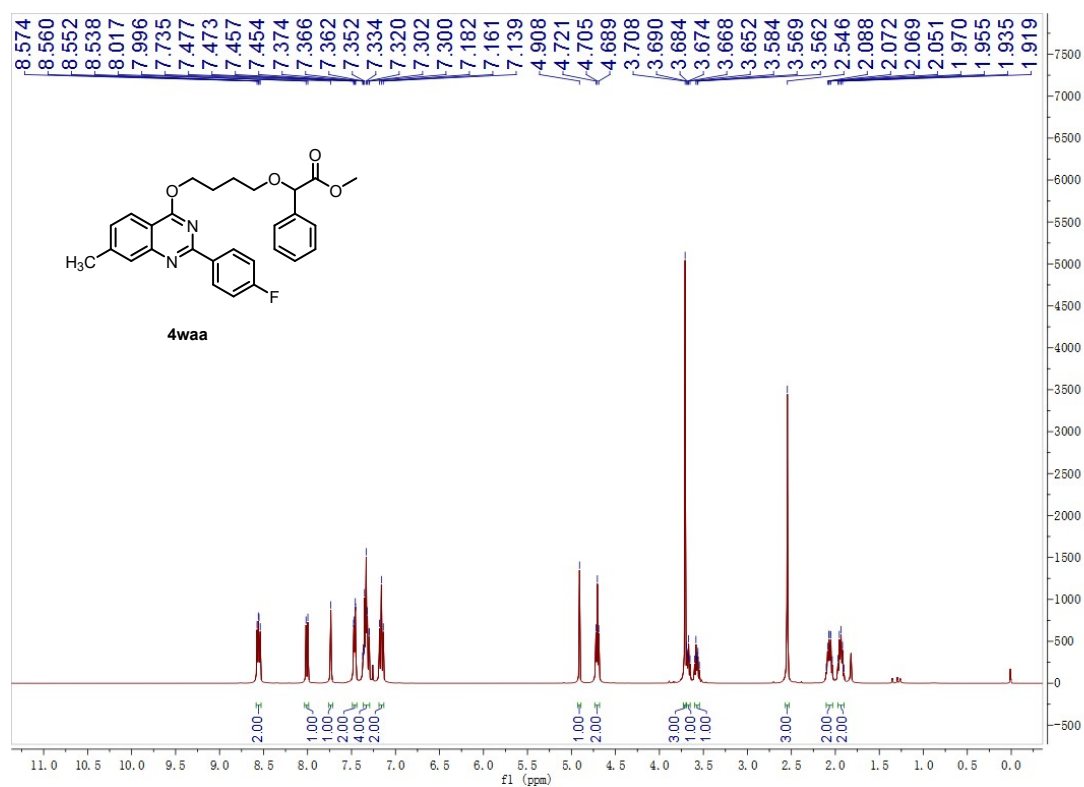

### <sup>13</sup>C-NMR of **4waa** (CDCl<sub>3</sub>, 100 Hz)

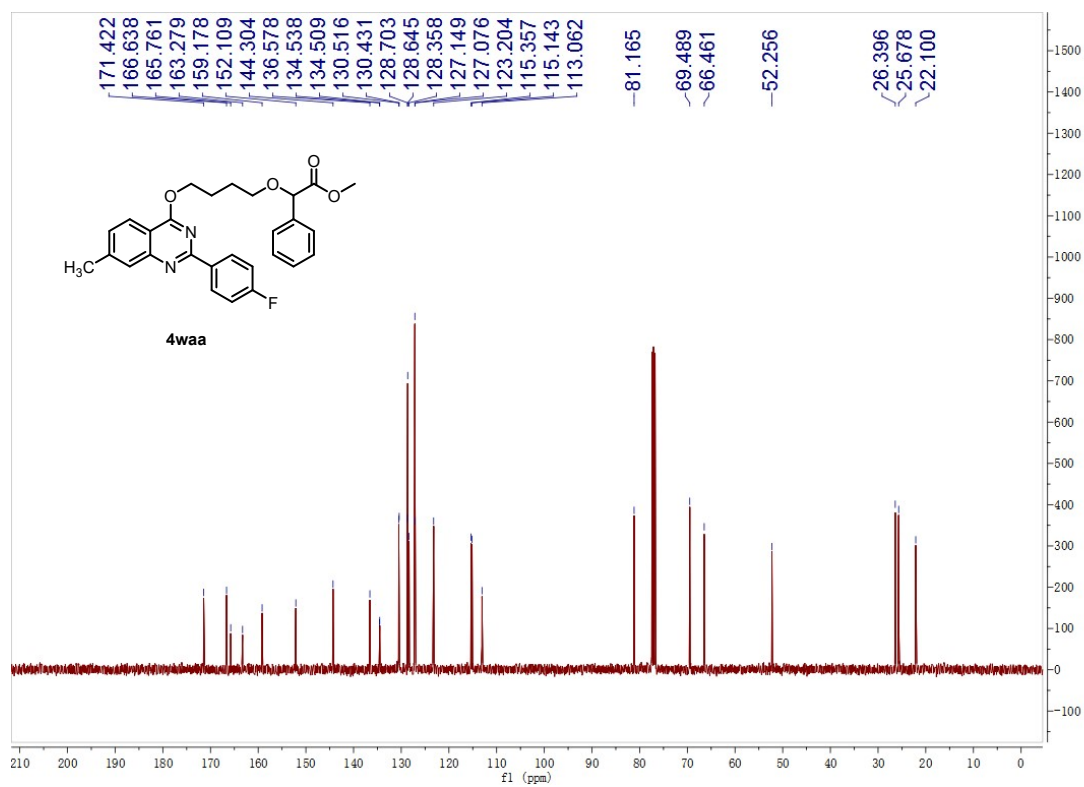

<sup>19</sup>F-NMR of **4waa** (CDCl<sub>3</sub>, 376 Hz)

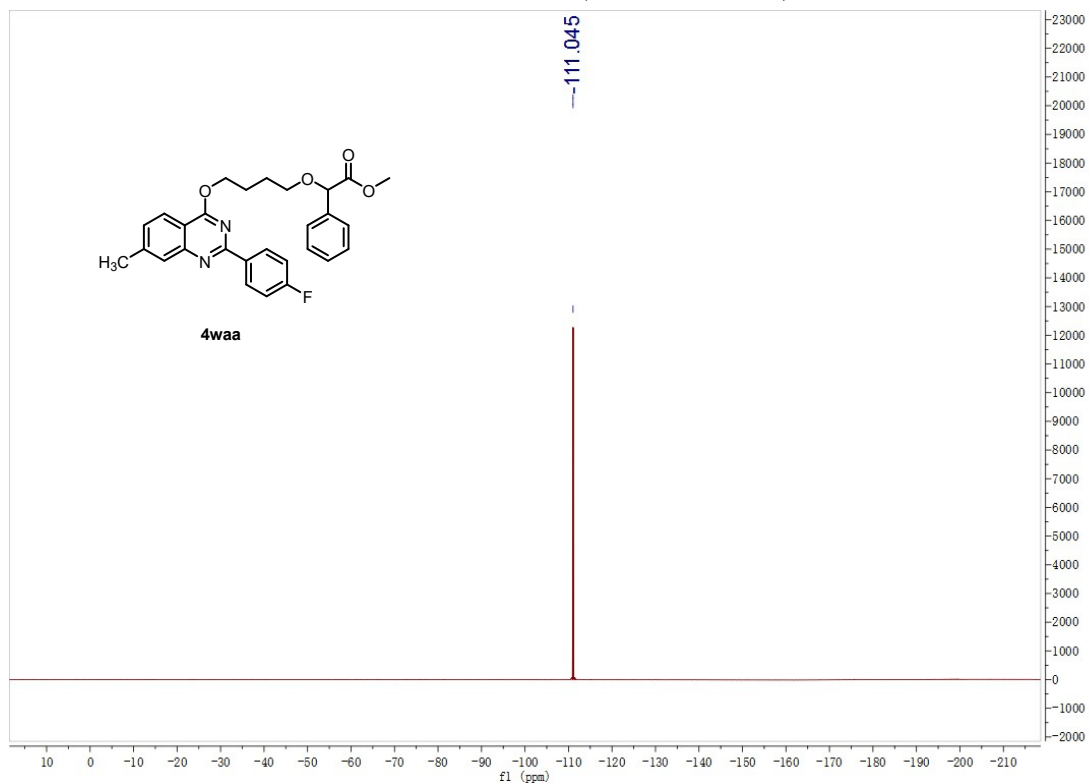

<sup>1</sup>H-NMR of **4xaa** (CDCl<sub>3</sub>, 400 Hz)

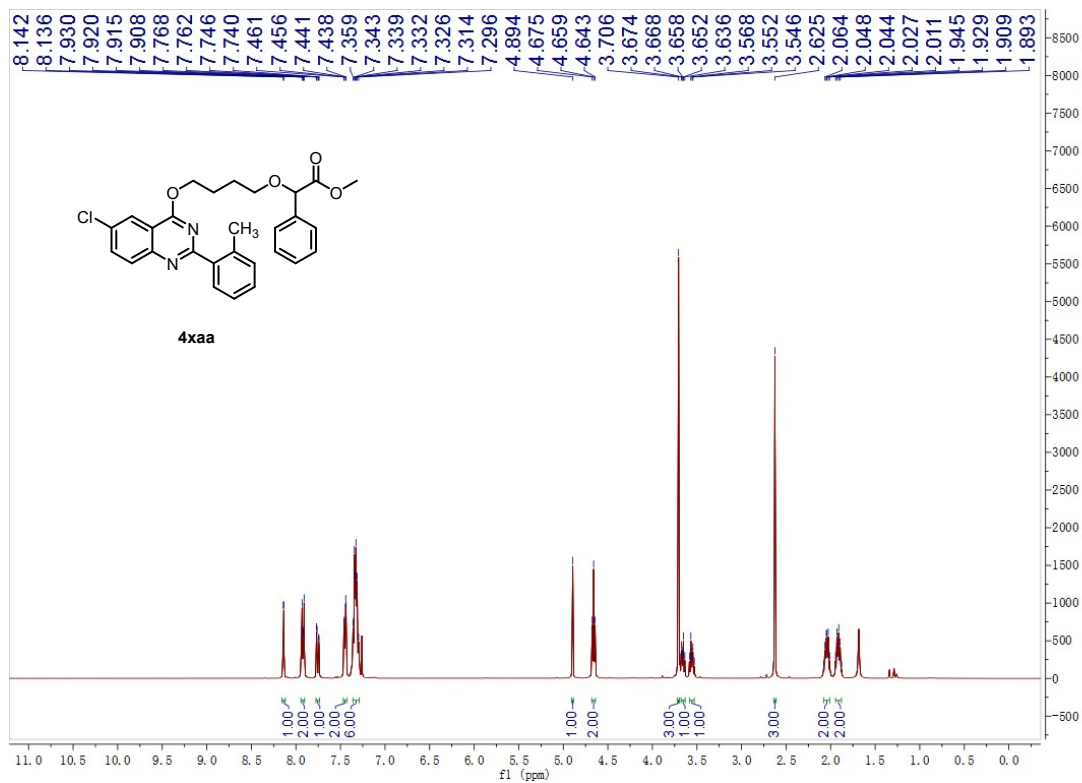

<sup>13</sup>C-NMR of **4xaa** (CDCl<sub>3</sub>, 100 Hz)

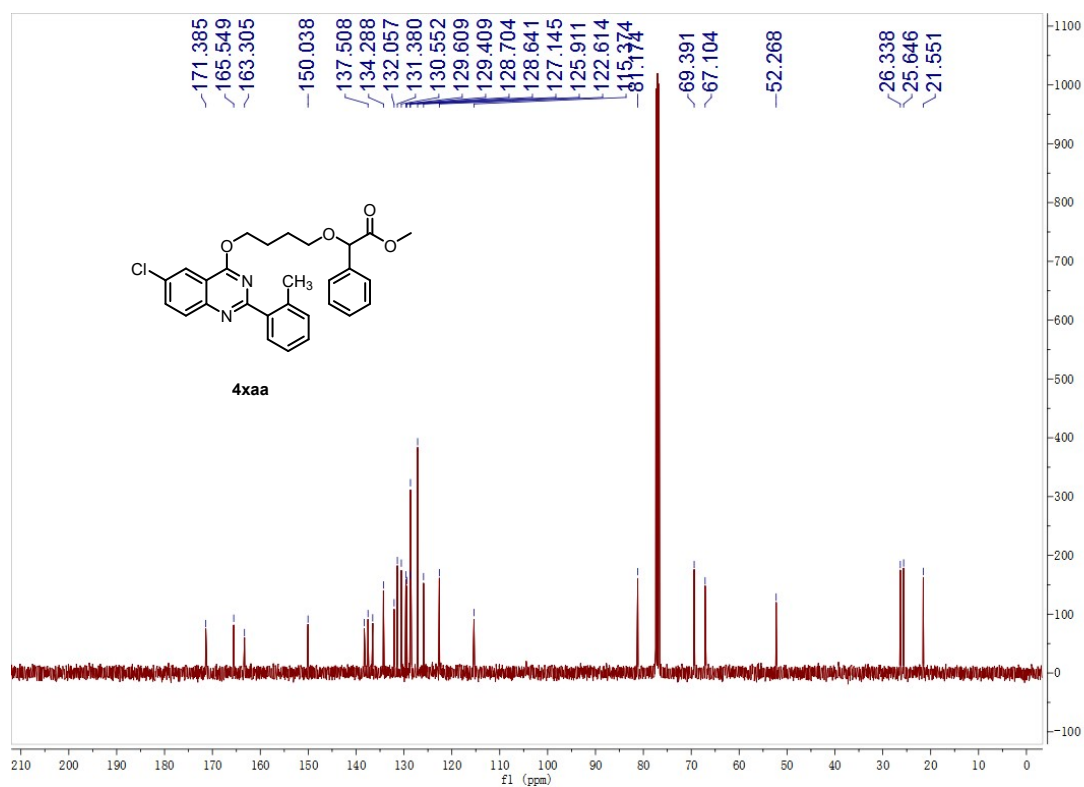

<sup>1</sup>H-NMR of **4y<sub>1</sub>aa** (CDCl<sub>3</sub>, 400 Hz)

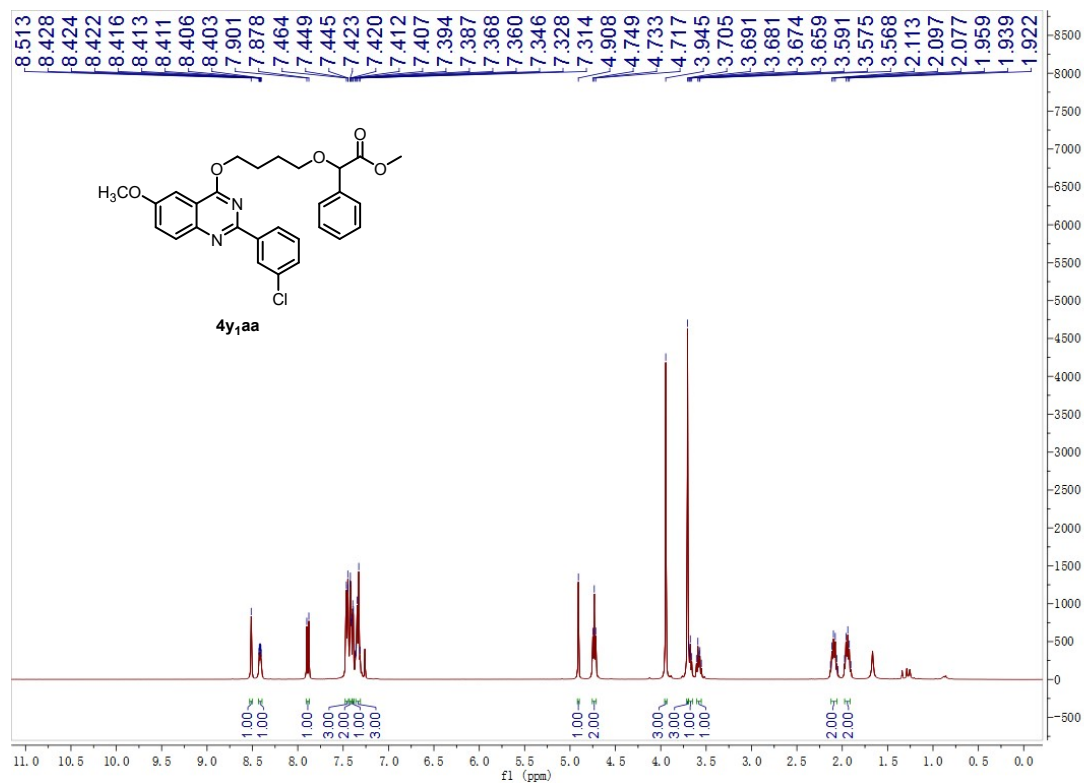

<sup>13</sup>C-NMR of **4y<sub>1</sub>aa** (CDCl<sub>3</sub>, 100 Hz)

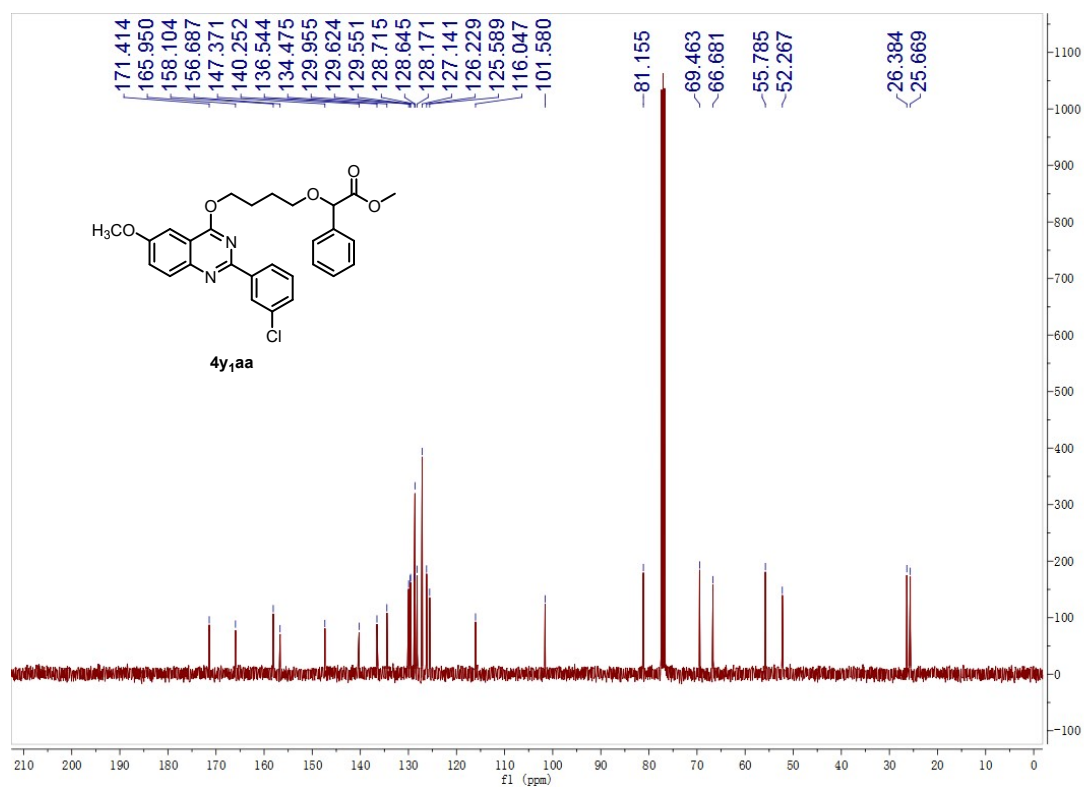

<sup>1</sup>H-NMR of **4y<sub>2</sub>aa** (CDCl<sub>3</sub>, 400 Hz)

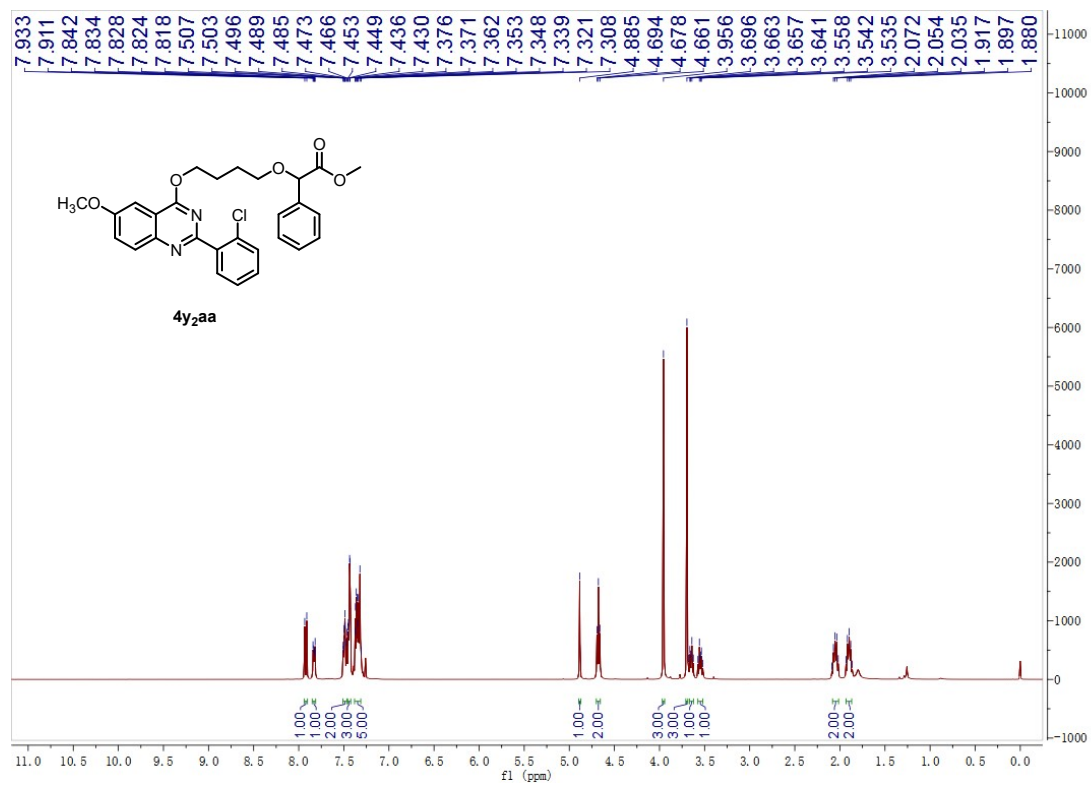

<sup>13</sup>C-NMR of **4y<sub>2</sub>aa** (CDCl<sub>3</sub>, 100 Hz)

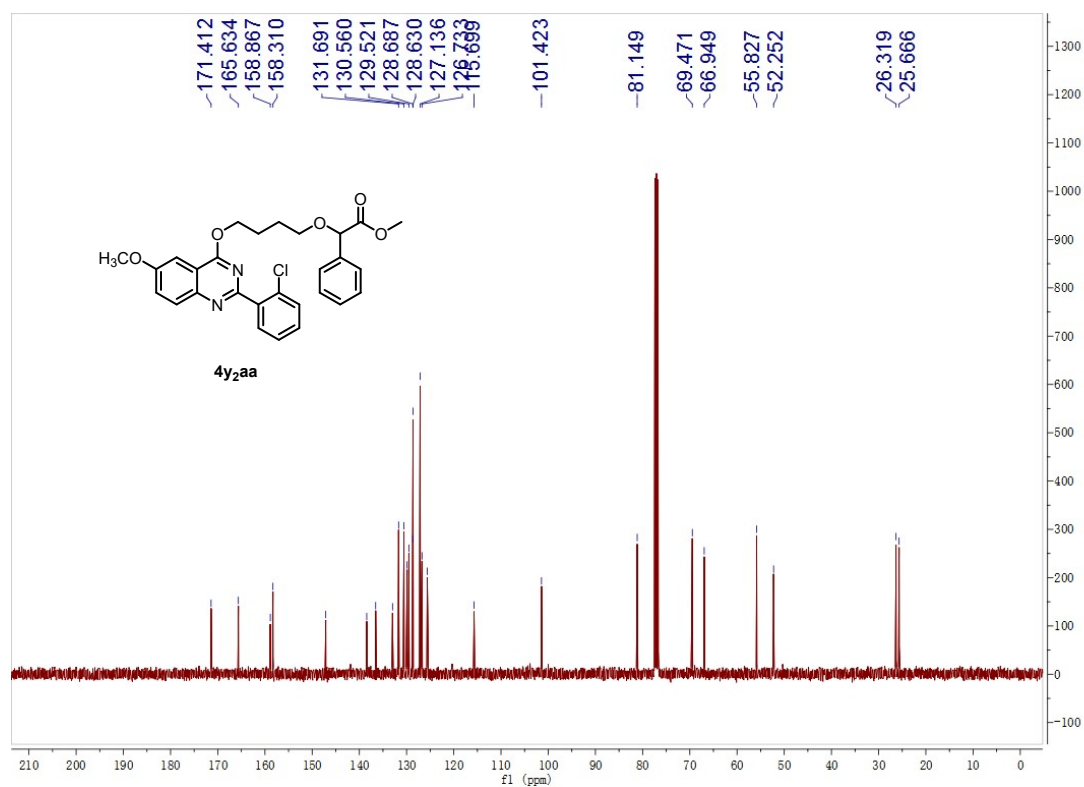

<sup>1</sup>H-NMR of **4aba** (CDCl<sub>3</sub>, 400 Hz)

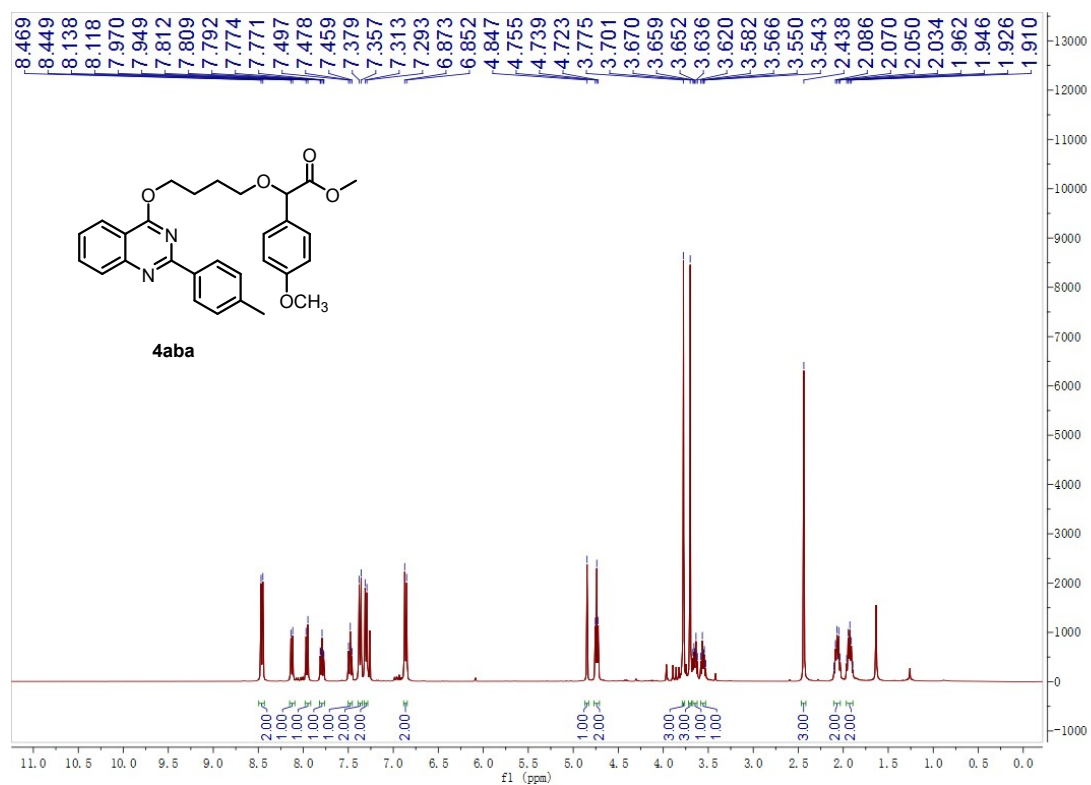

<sup>13</sup>C-NMR of **4aba** (CDCl<sub>3</sub>, 100 Hz)

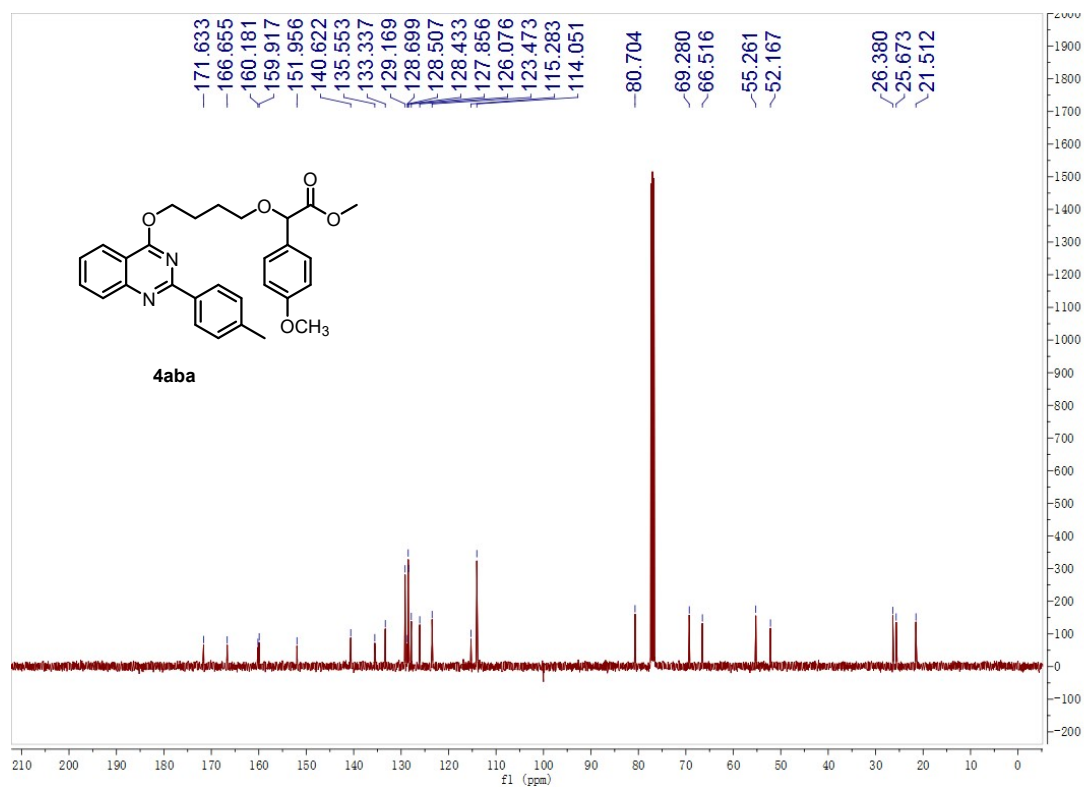

<sup>1</sup>H-NMR of **4aca** (CDCl<sub>3</sub>, 400 Hz)

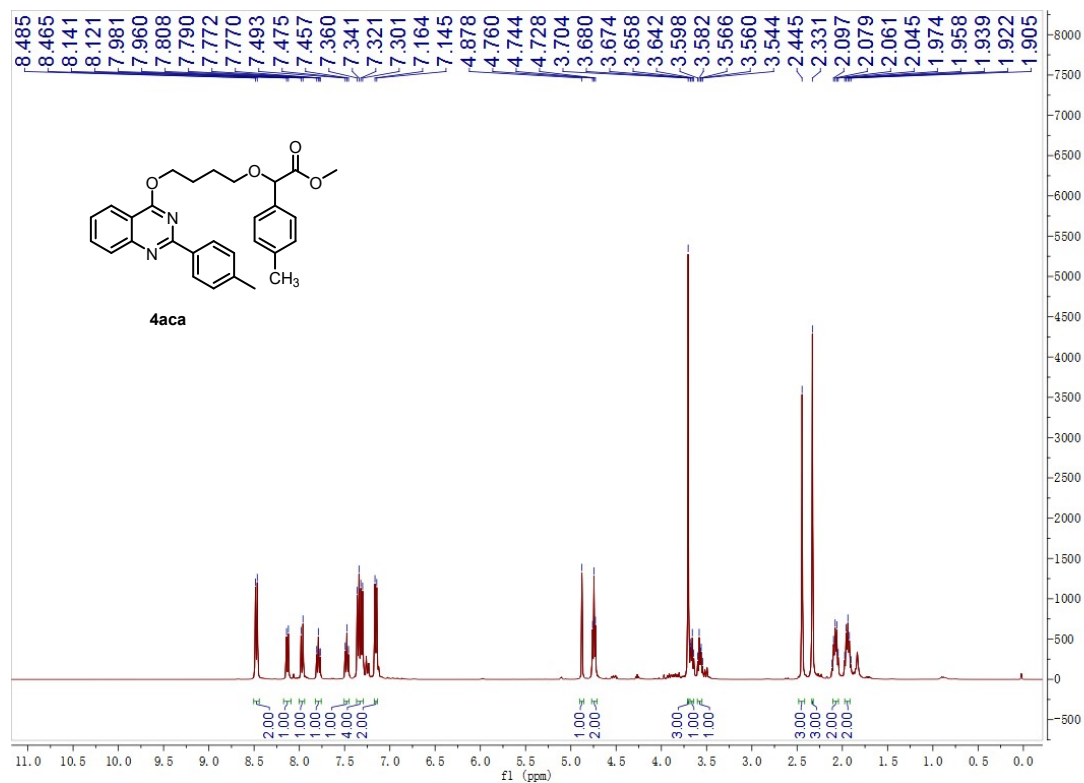

<sup>13</sup>C-NMR of **4aca** (CDCl<sub>3</sub>, 100 Hz)

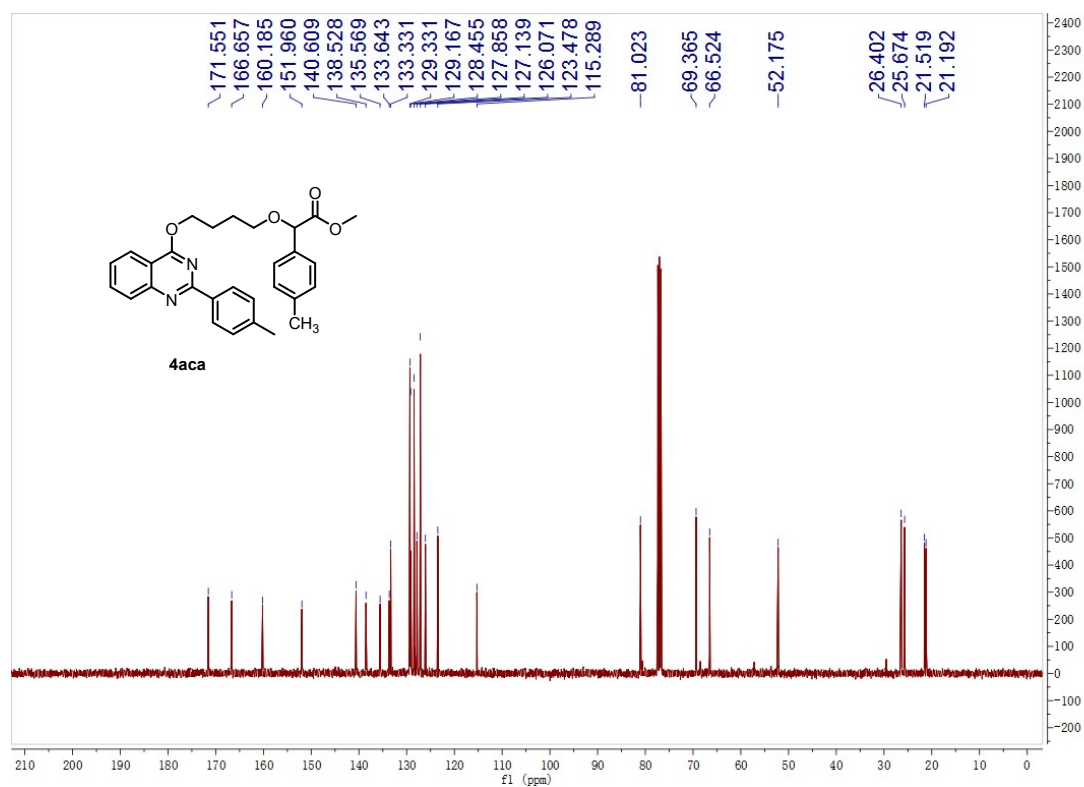

<sup>1</sup>H-NMR of **4ada** (CDCl<sub>3</sub>, 400 Hz)

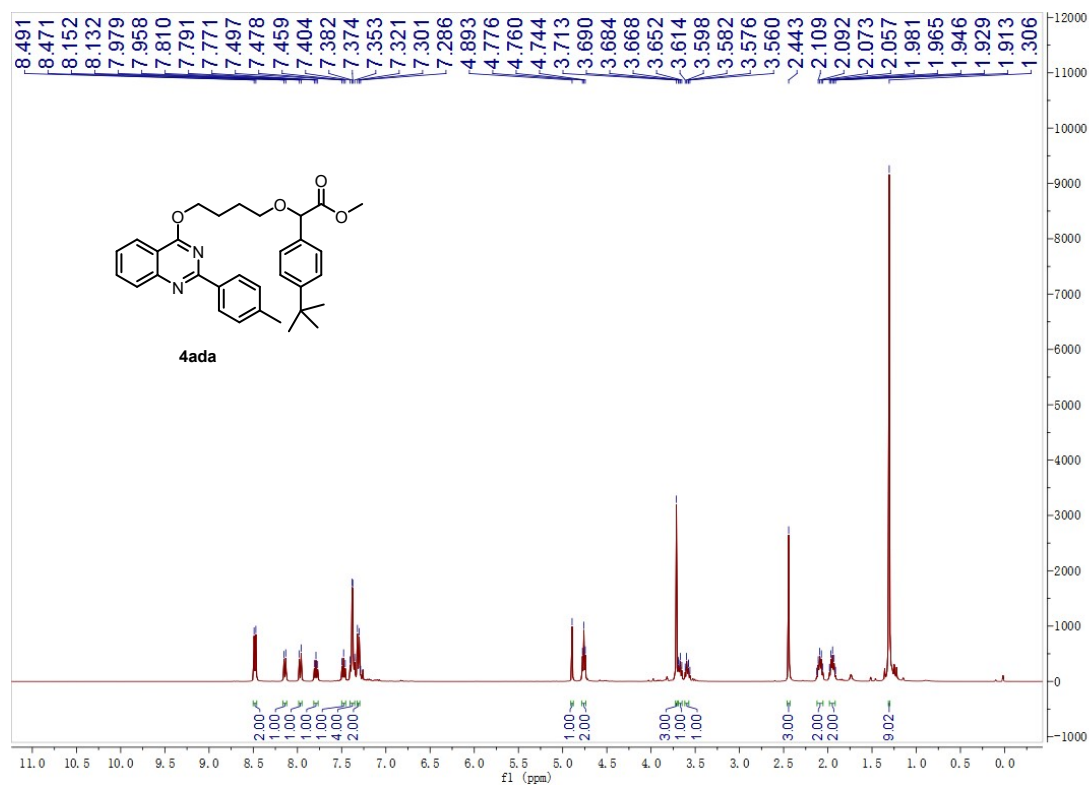



<sup>13</sup>C-NMR of **4ada** (CDCl<sub>3</sub>, 100 Hz)

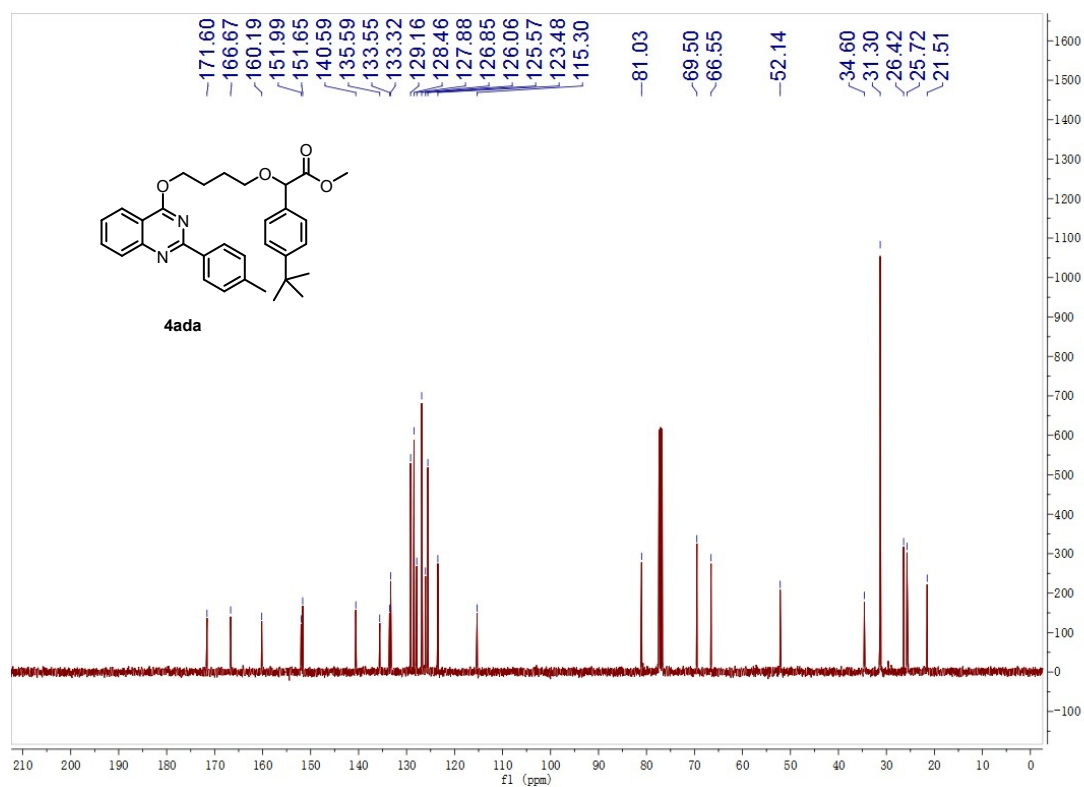

<sup>1</sup>H-NMR of **4aea** (CDCl<sub>3</sub>, 400 Hz)

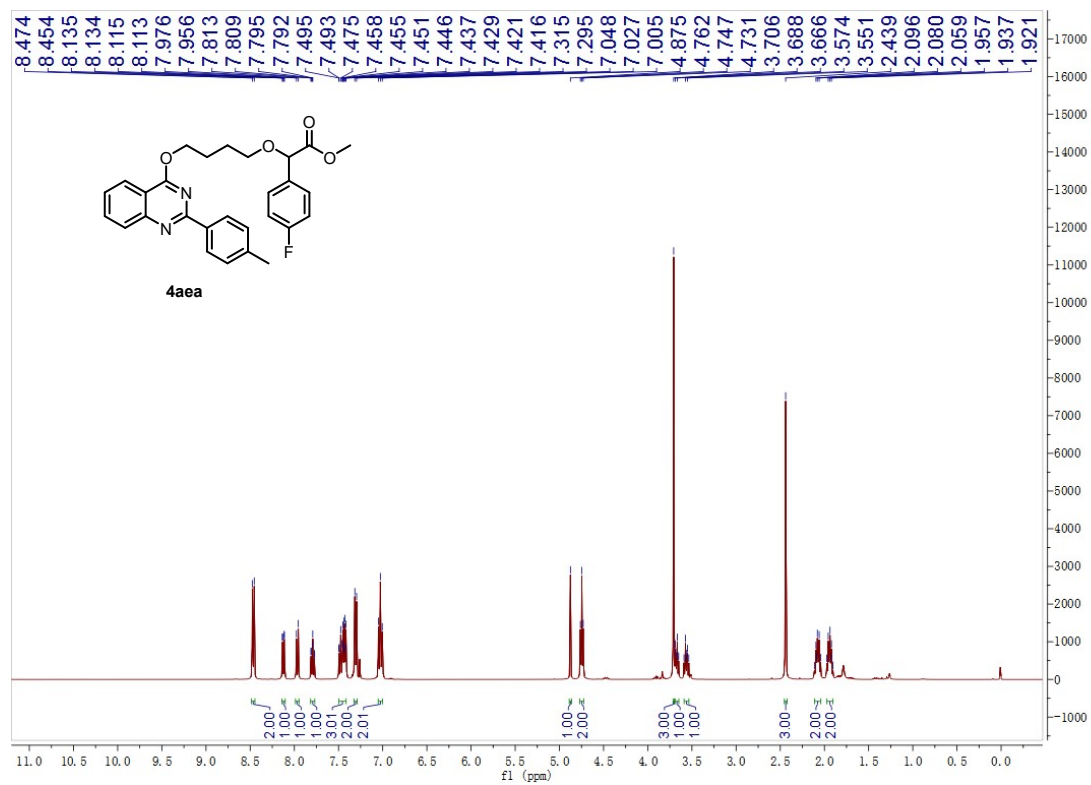

<sup>13</sup>C-NMR of **4aea** (CDCl<sub>3</sub>, 100 Hz)

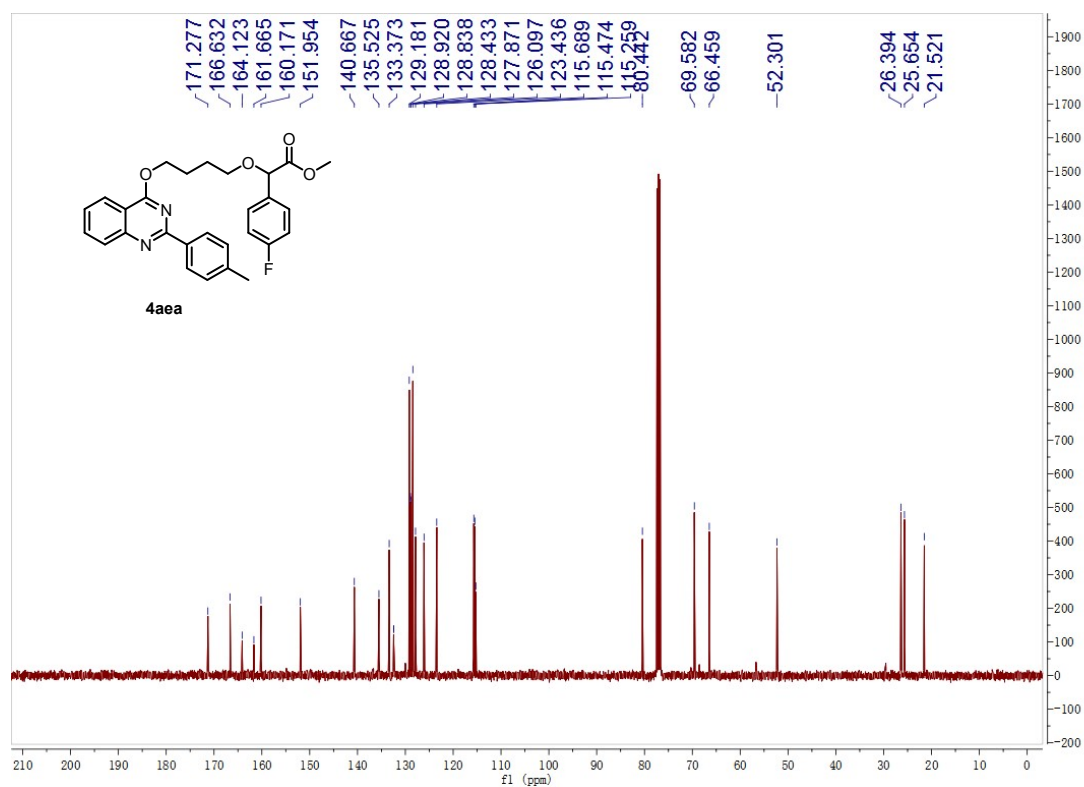

<sup>19</sup>F-NMR of **4aea** (CDCl<sub>3</sub>, 376 Hz)

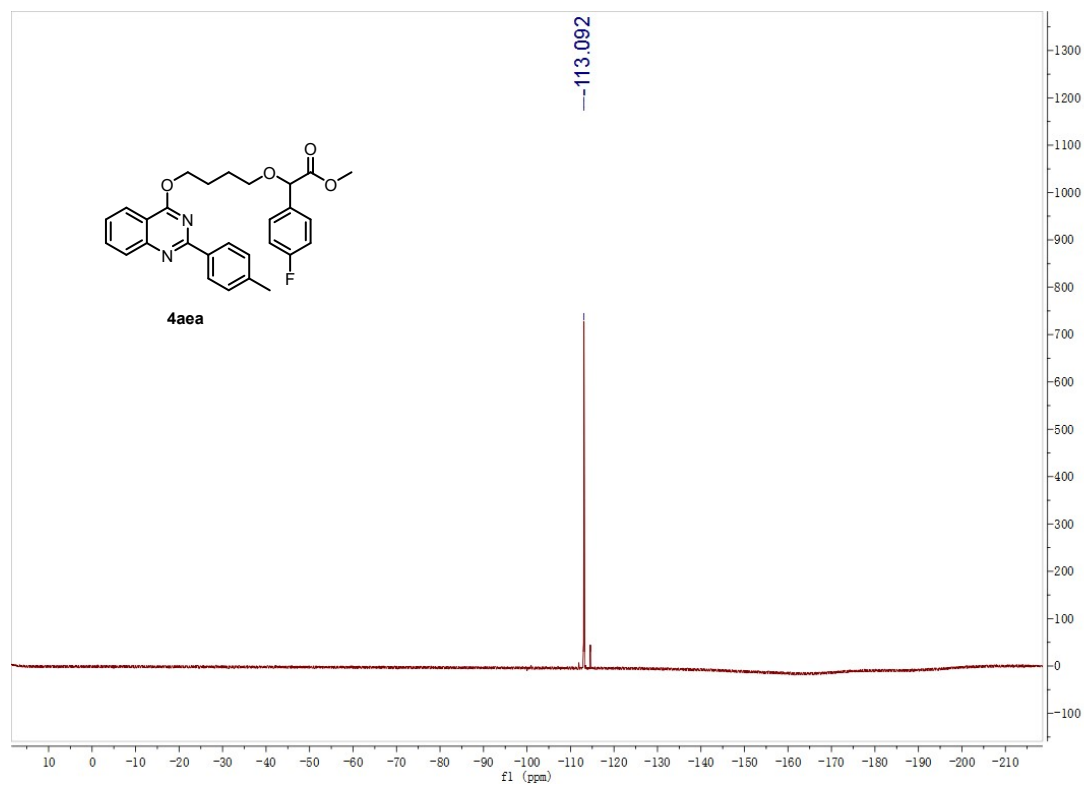



<sup>1</sup>H-NMR of **4aga** (CDCl<sub>3</sub>, 400 Hz)

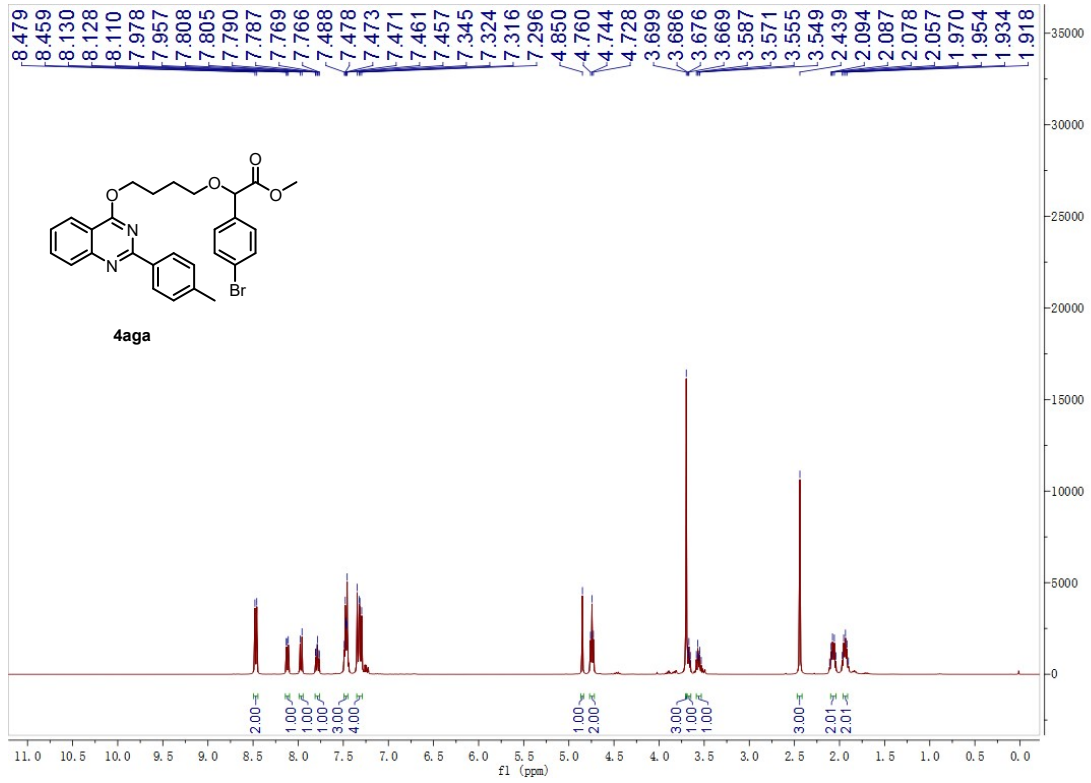

<sup>13</sup>C-NMR of **4aga** (CDCl<sub>3</sub>, 100 Hz)

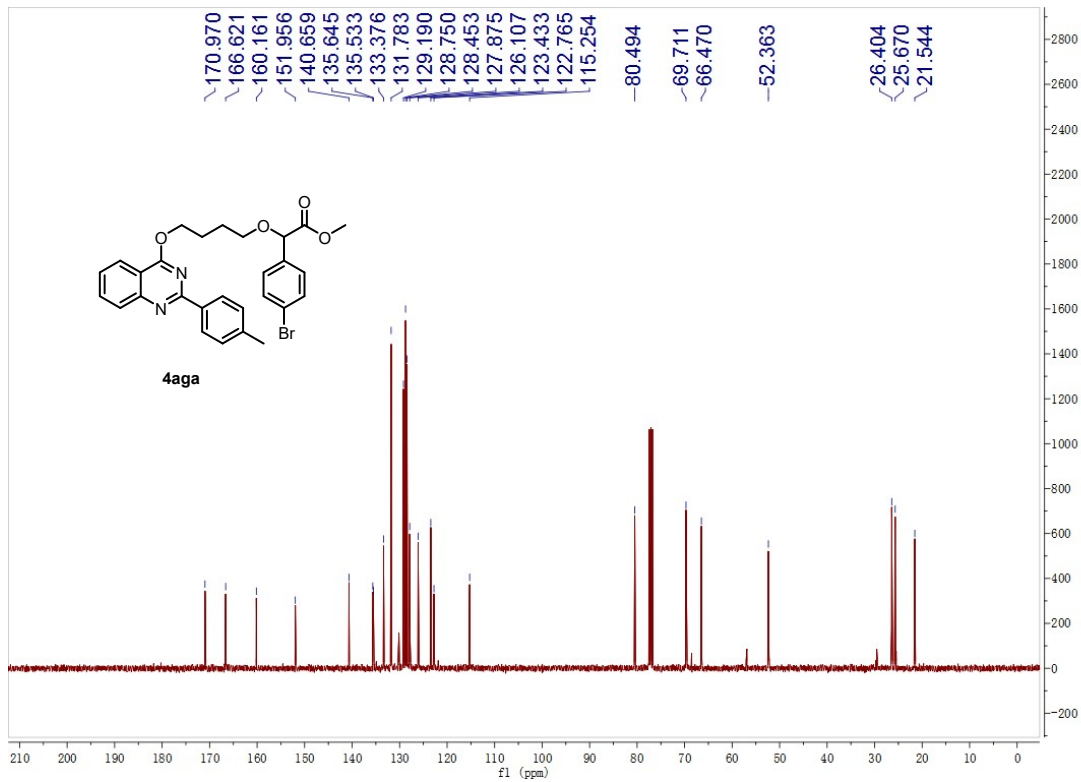

### <sup>1</sup>H-NMR of **4aia** (CDCl<sub>3</sub>, 400 Hz)

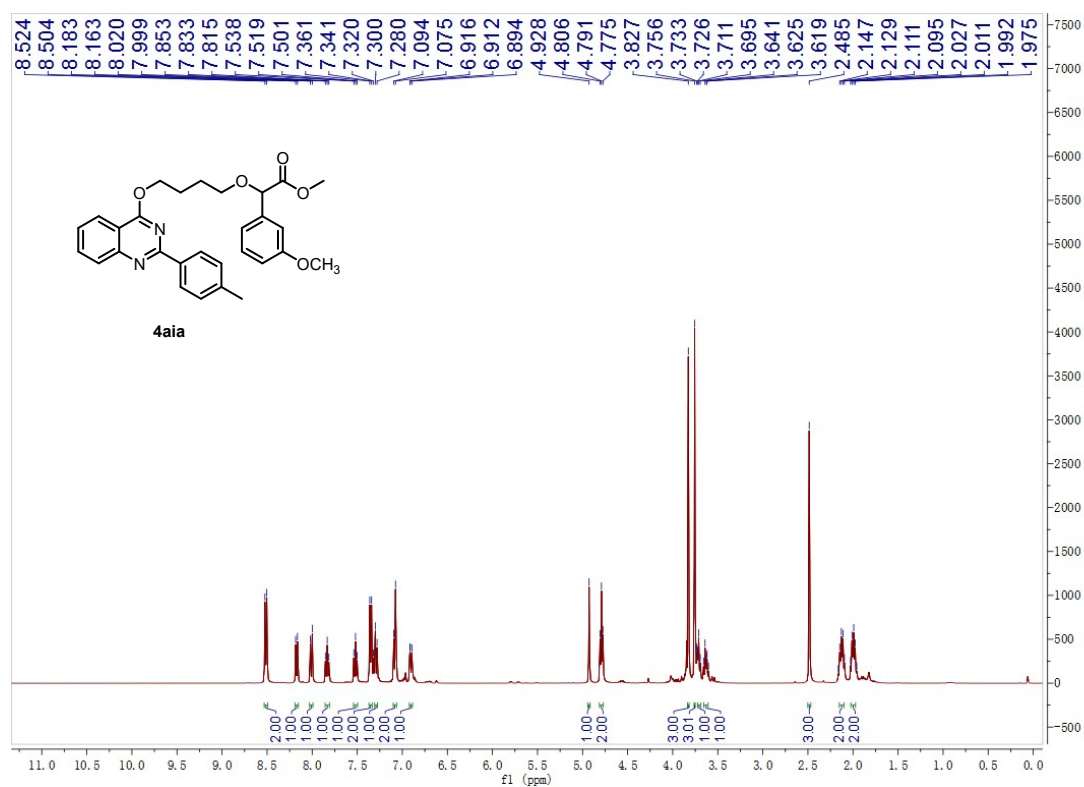

### <sup>13</sup>C-NMR of **4aia** (CDCl<sub>3</sub>, 100 Hz)

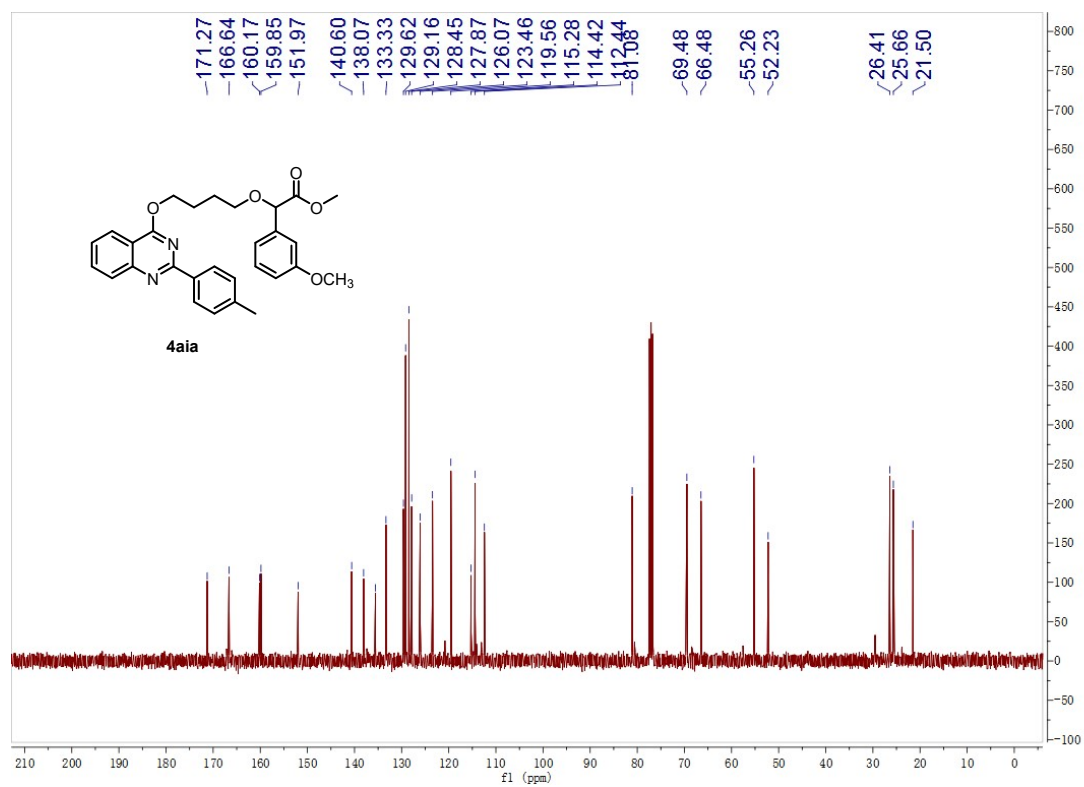

### <sup>1</sup>H-NMR of **4aja** (CDCl<sub>3</sub>, 400 Hz)

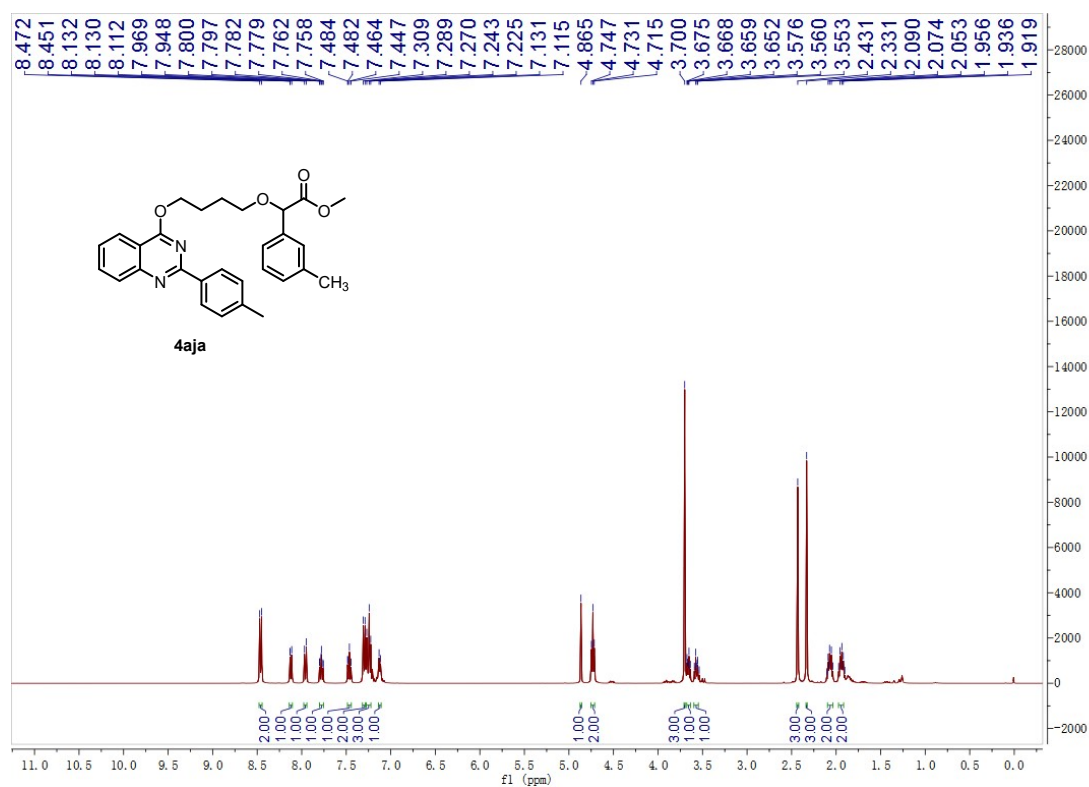

### <sup>13</sup>C-NMR of **4aja** (CDCl<sub>3</sub>, 100 Hz)

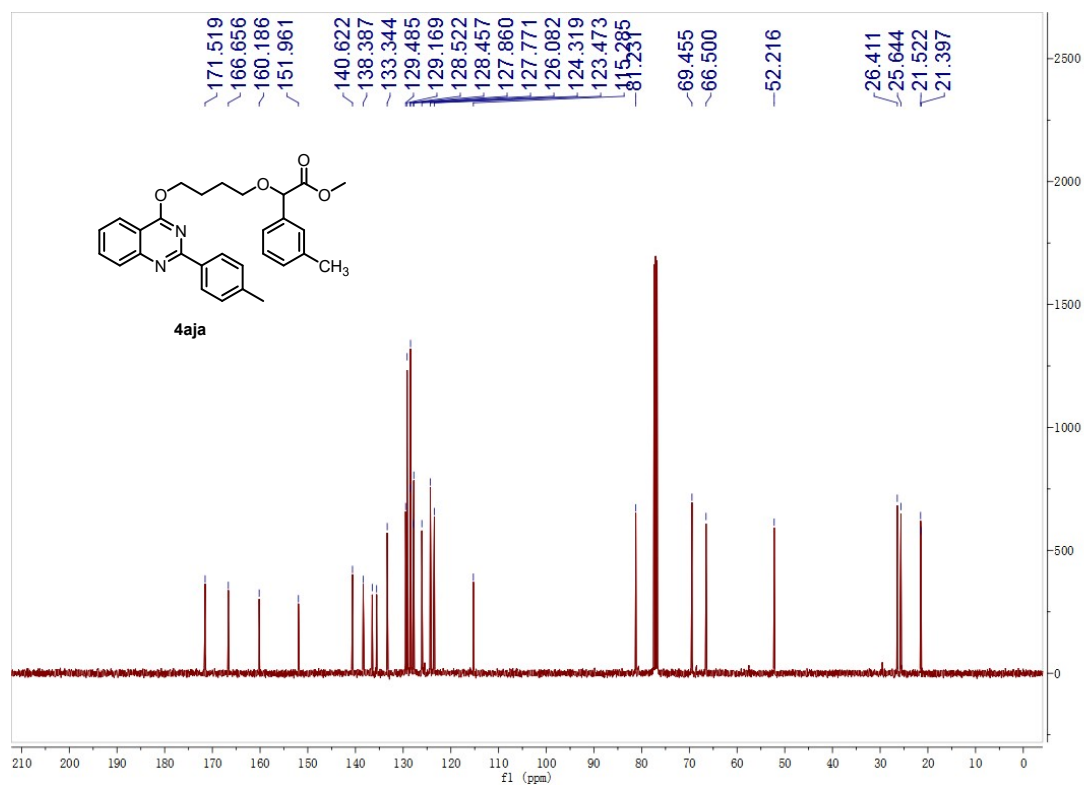

### <sup>1</sup>H-NMR of **4aka** (CDCl<sub>3</sub>, 400 Hz)

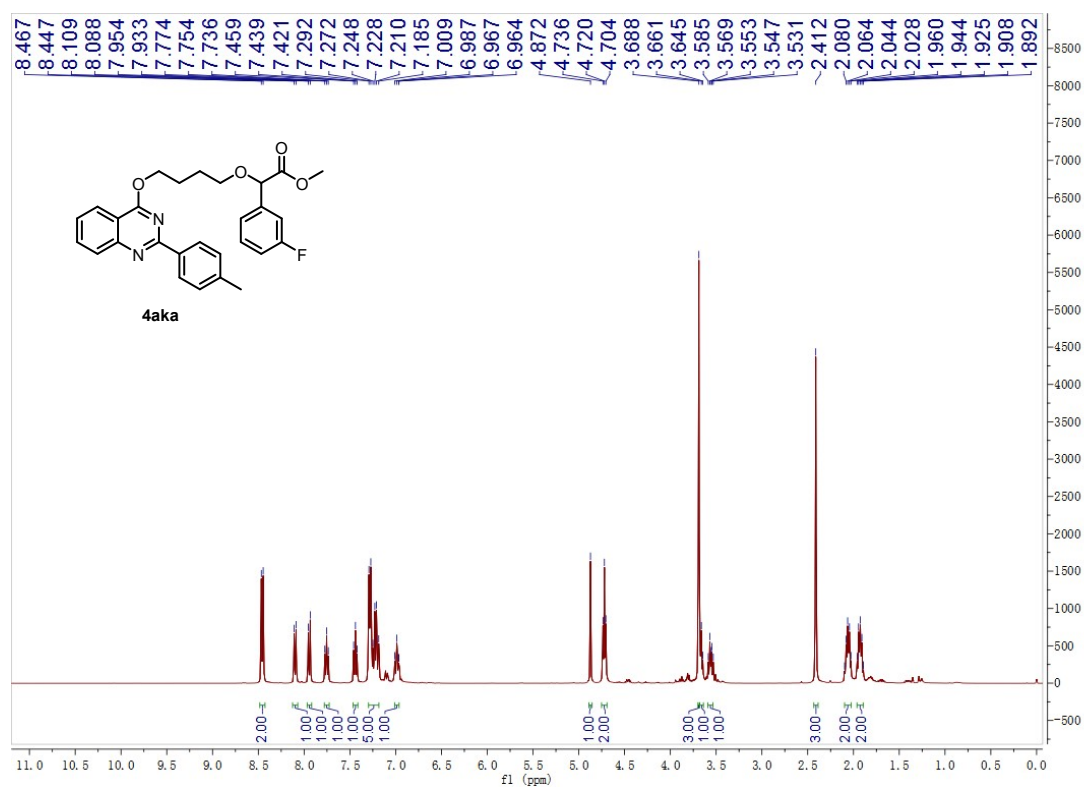

### <sup>13</sup>C-NMR of **4aka** (CDCl<sub>3</sub>, 100 Hz)

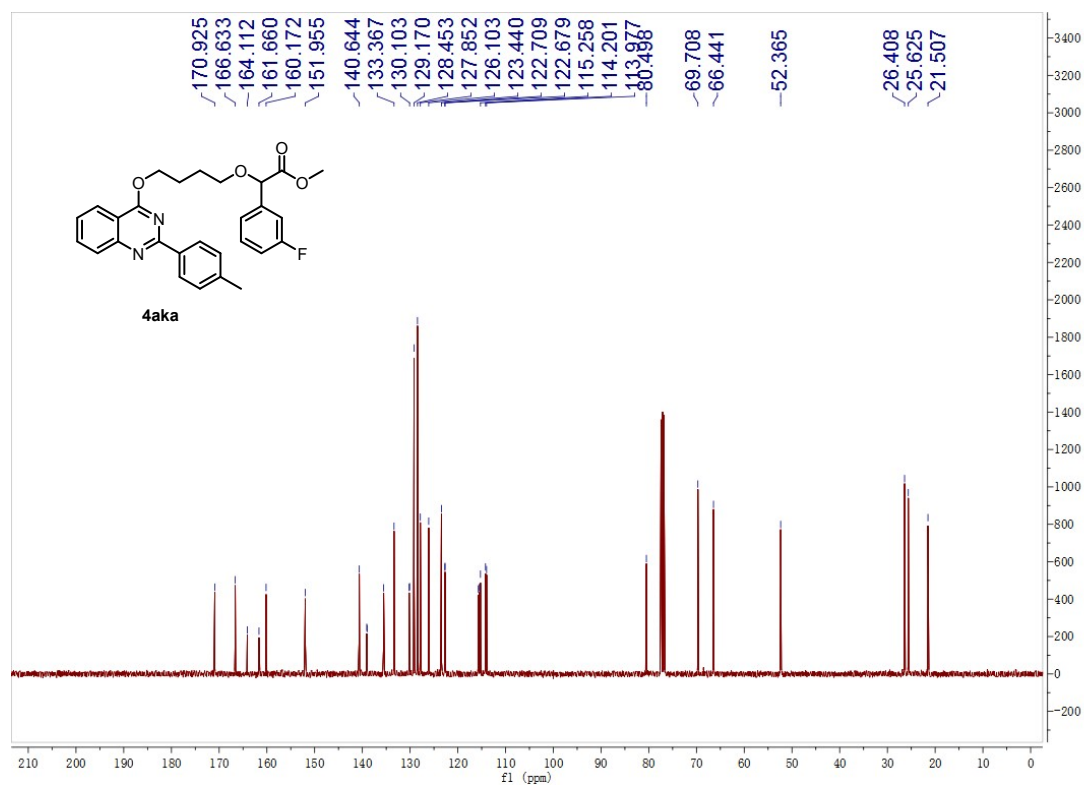

<sup>19</sup>F-NMR of **4aka** (CDCl<sub>3</sub>, 376 Hz)

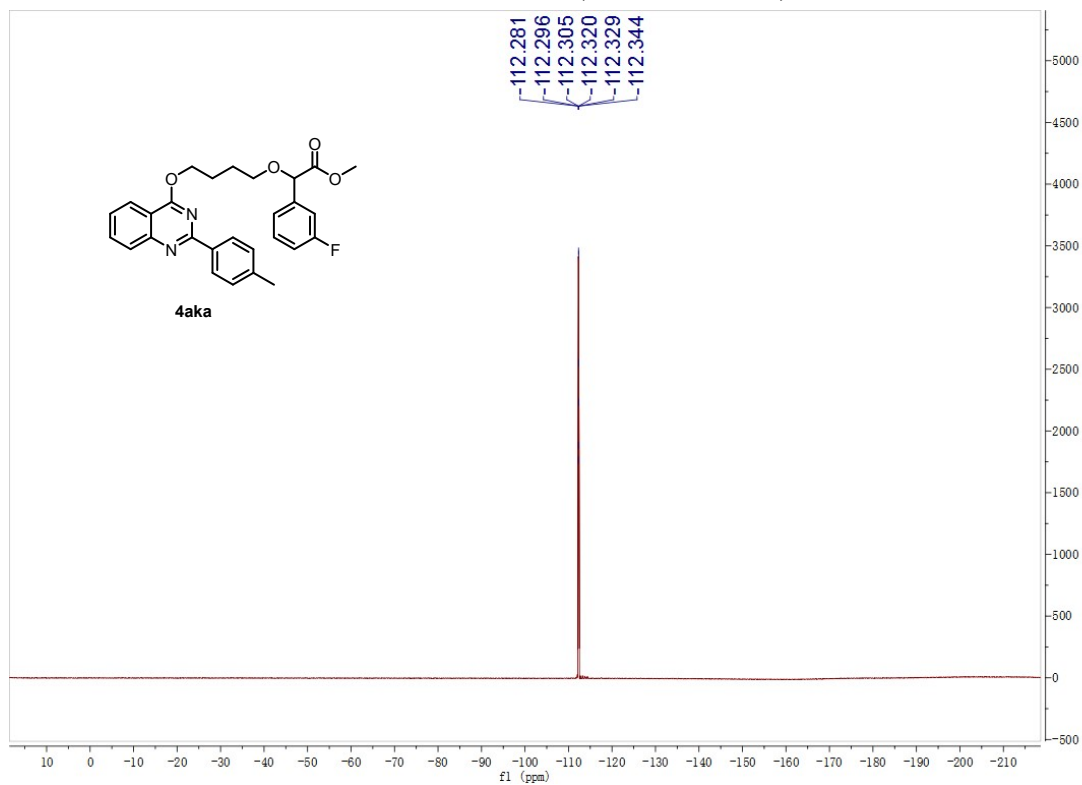

<sup>1</sup>H-NMR of **4ala** (CDCl<sub>3</sub>, 400 Hz)

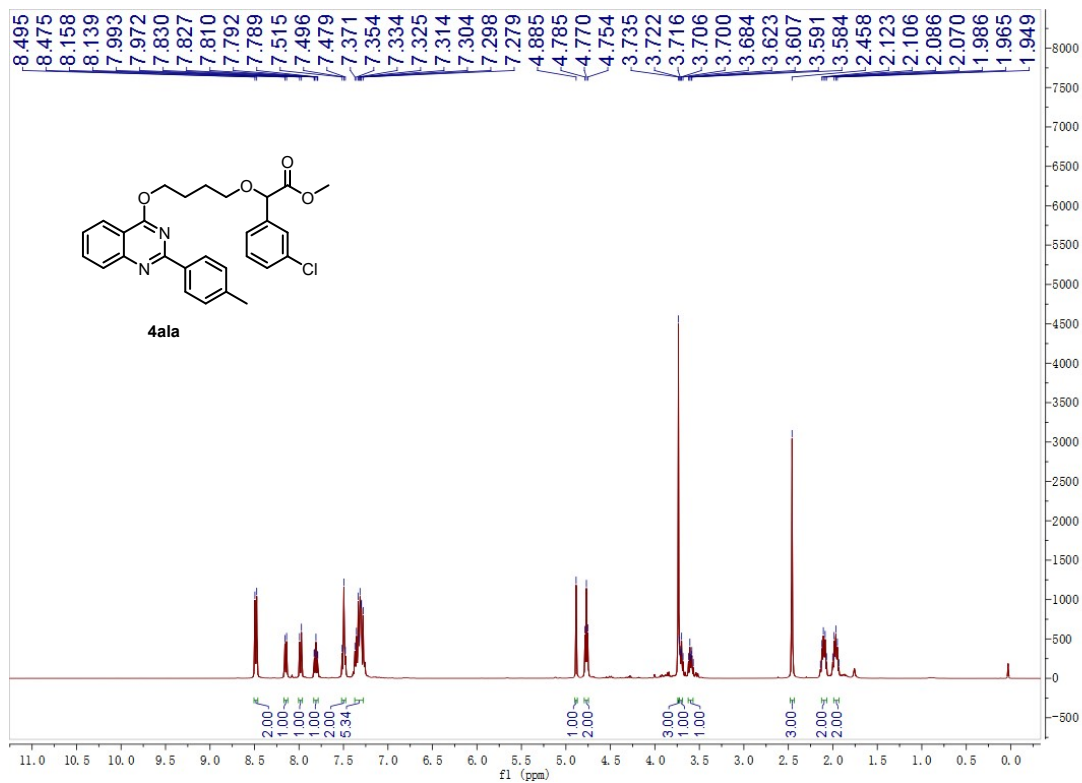



<sup>13</sup>C-NMR of **4ala** (CDCl<sub>3</sub>, 100 Hz)

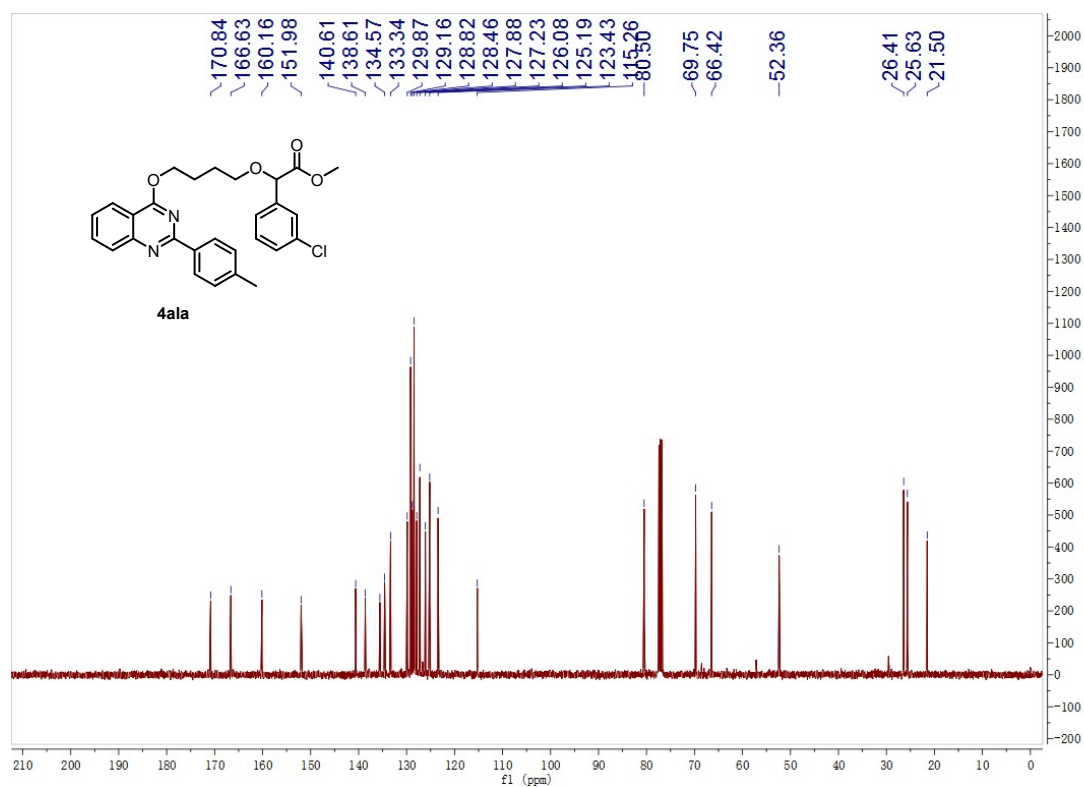

<sup>1</sup>H-NMR of **4ama** (CDCl<sub>3</sub>, 400 Hz)

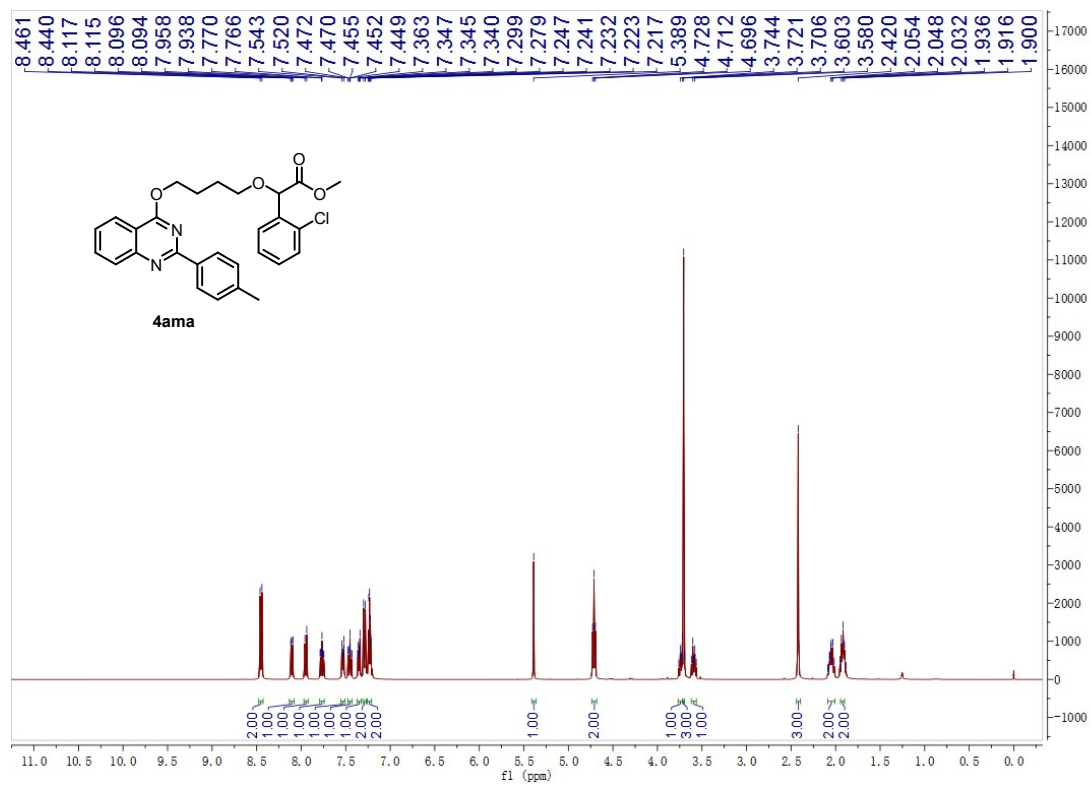

<sup>13</sup>C-NMR of **4ama** (CDCl<sub>3</sub>, 100 Hz)

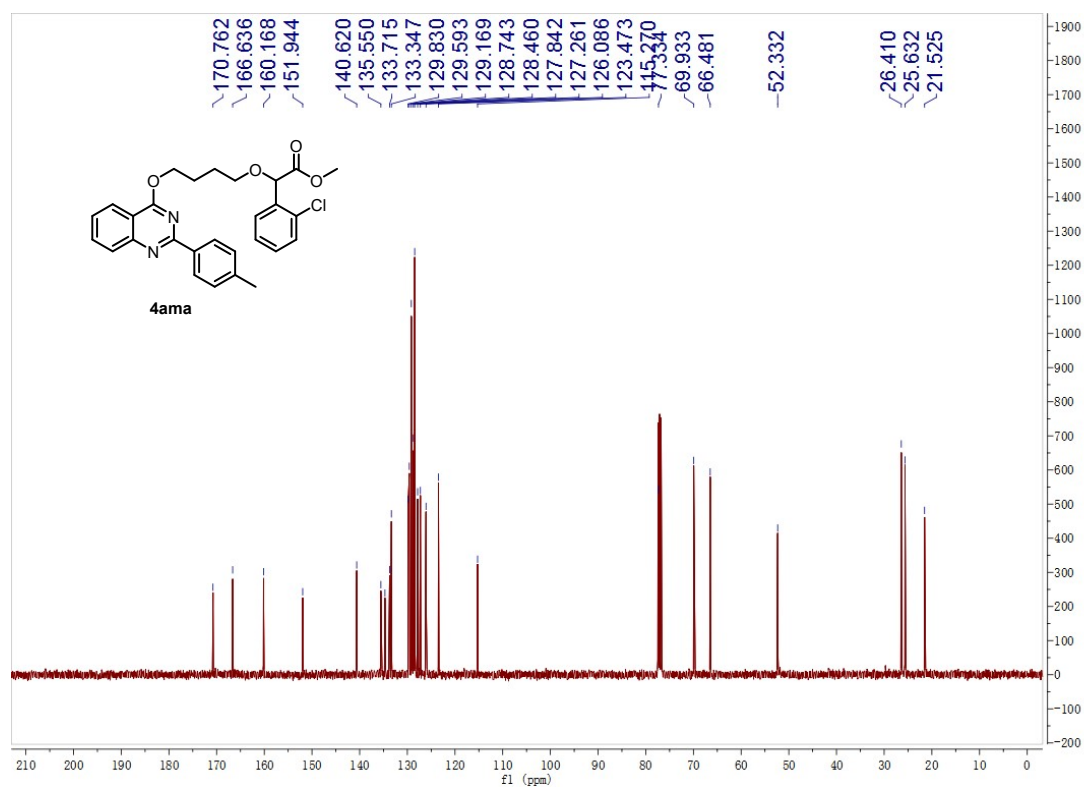

<sup>1</sup>H-NMR of **4ana** (CDCl<sub>3</sub>, 400 Hz)

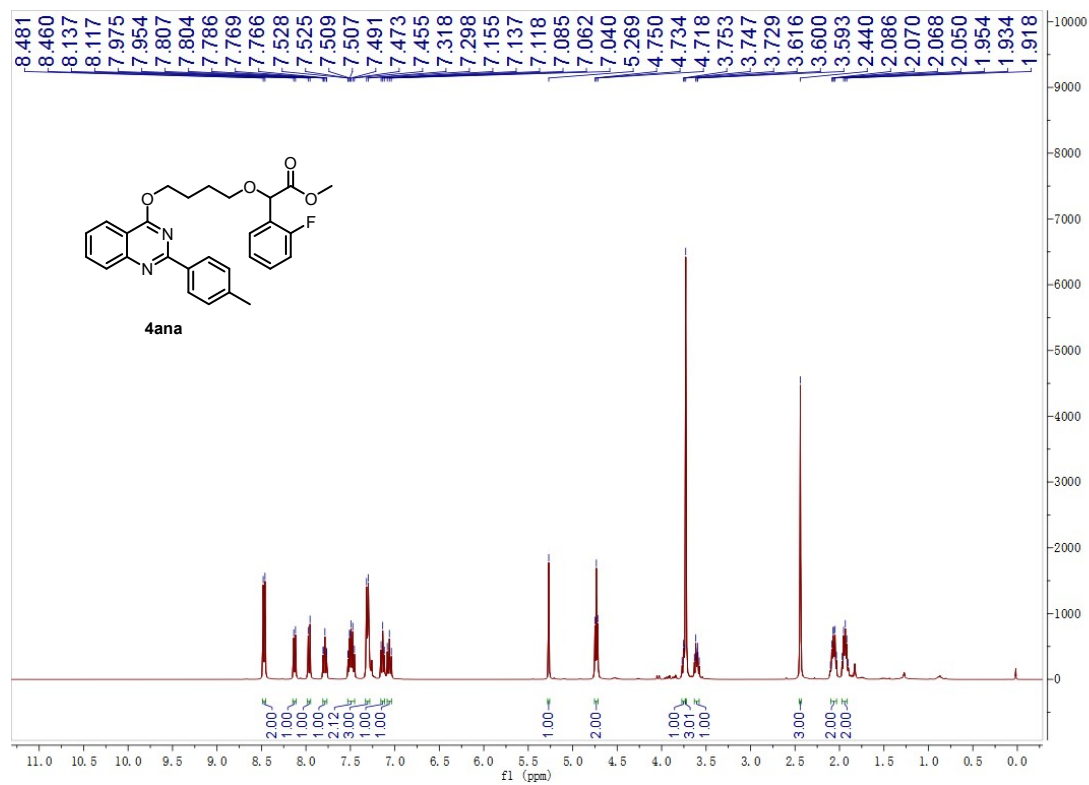

<sup>13</sup>C-NMR of **4ana** (CDCl<sub>3</sub>, 100 Hz)

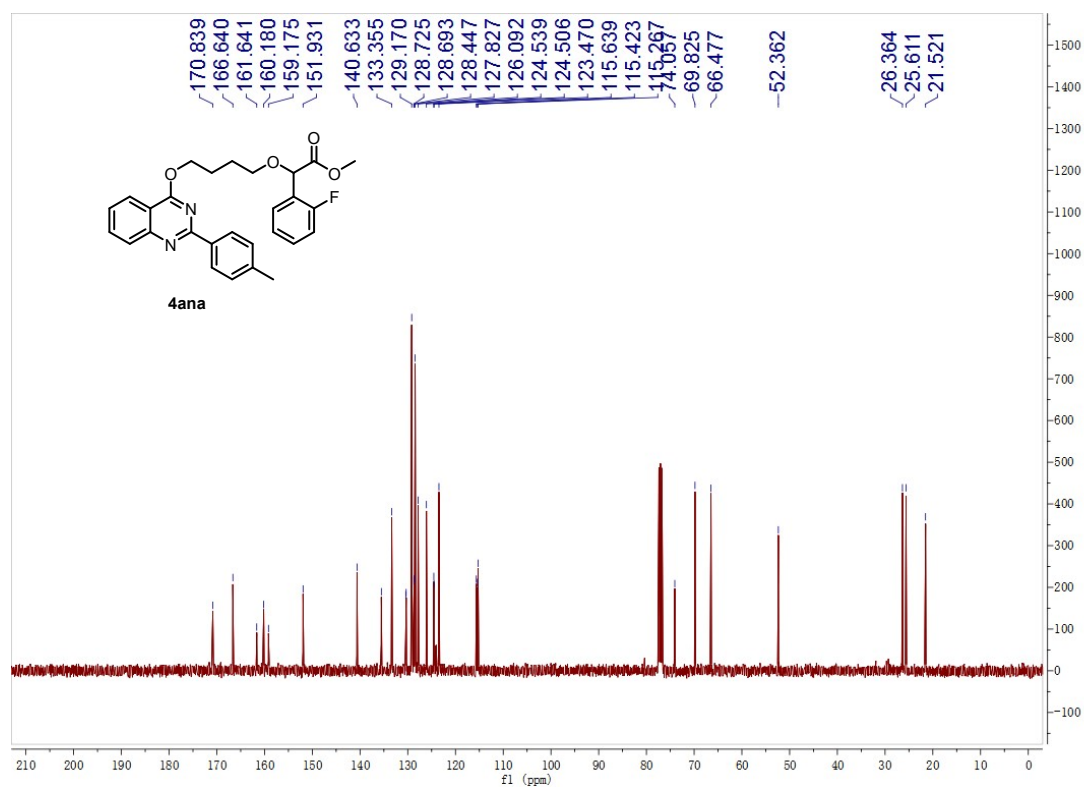

<sup>19</sup>F-NMR of **4ana** (CDCl<sub>3</sub>, 376 Hz)

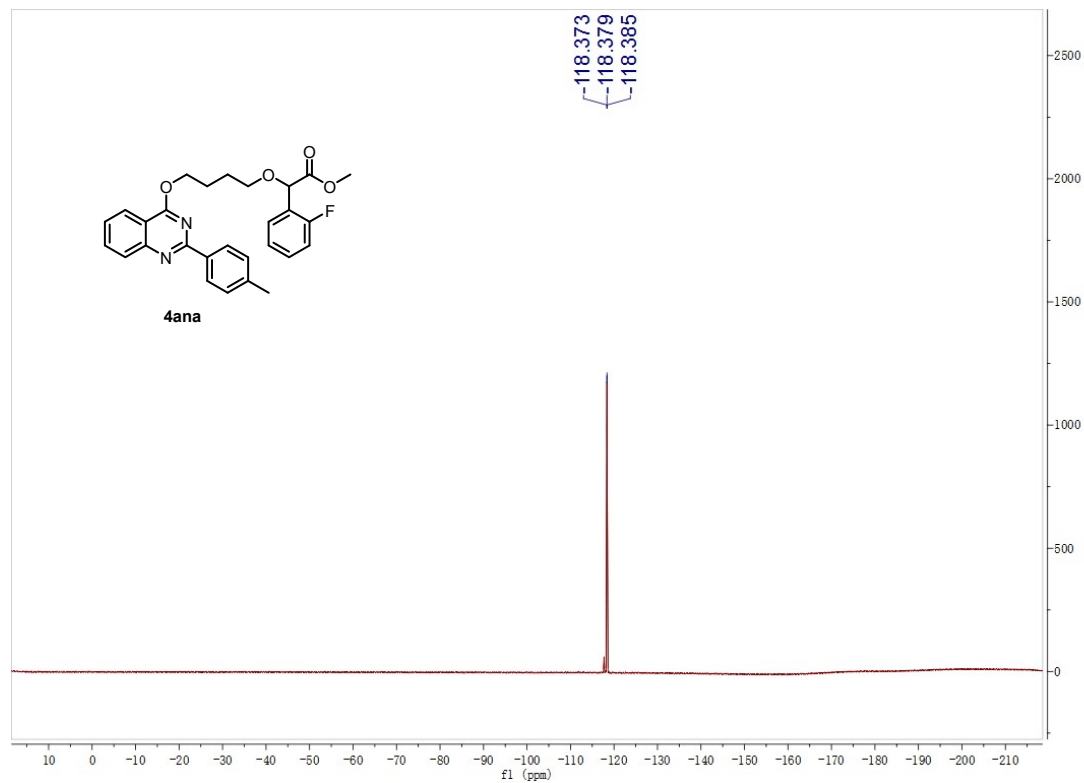

<sup>1</sup>H-NMR of **4a** (CDCl<sub>3</sub>, 400 Hz)

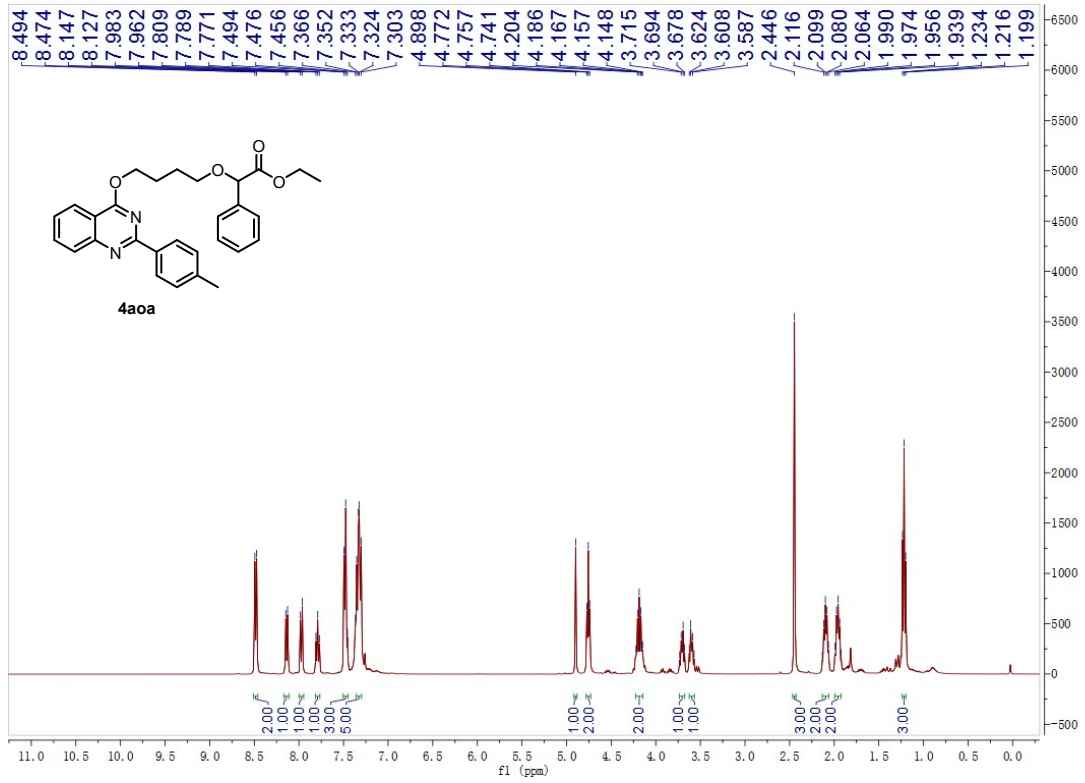

<sup>13</sup>C-NMR of **4a** (CDCl<sub>3</sub>, 100 Hz)

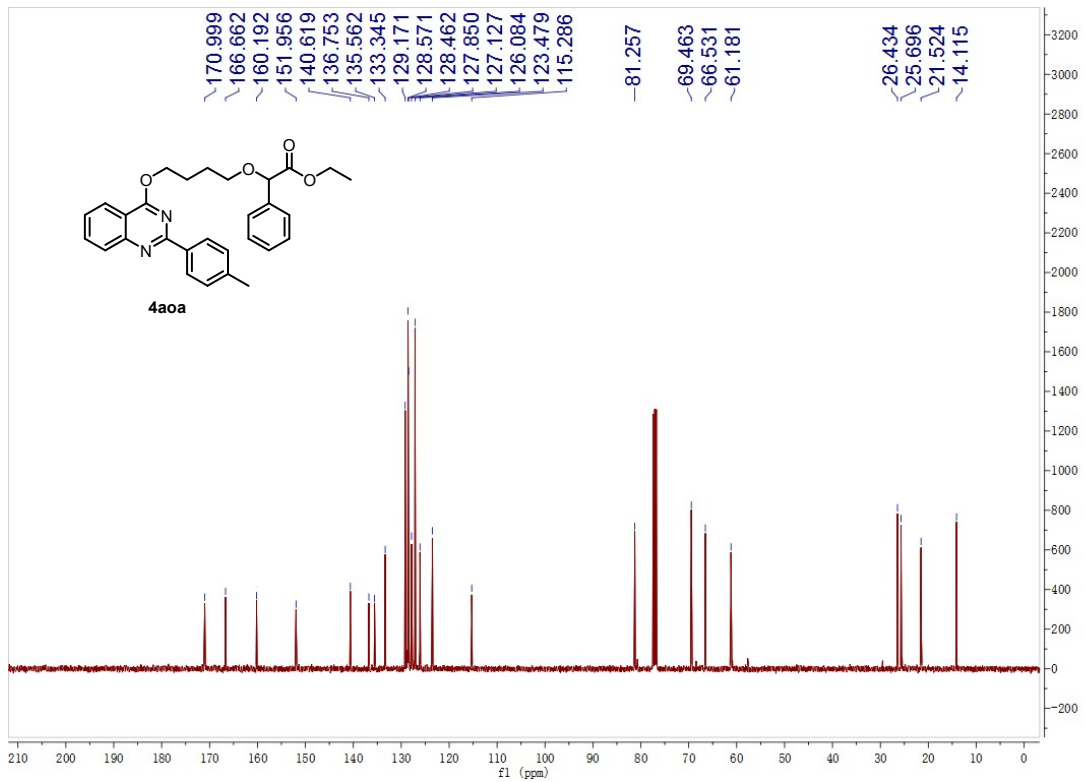

### <sup>1</sup>H-NMR of **4apa** (CDCl<sub>3</sub>, 400 Hz)

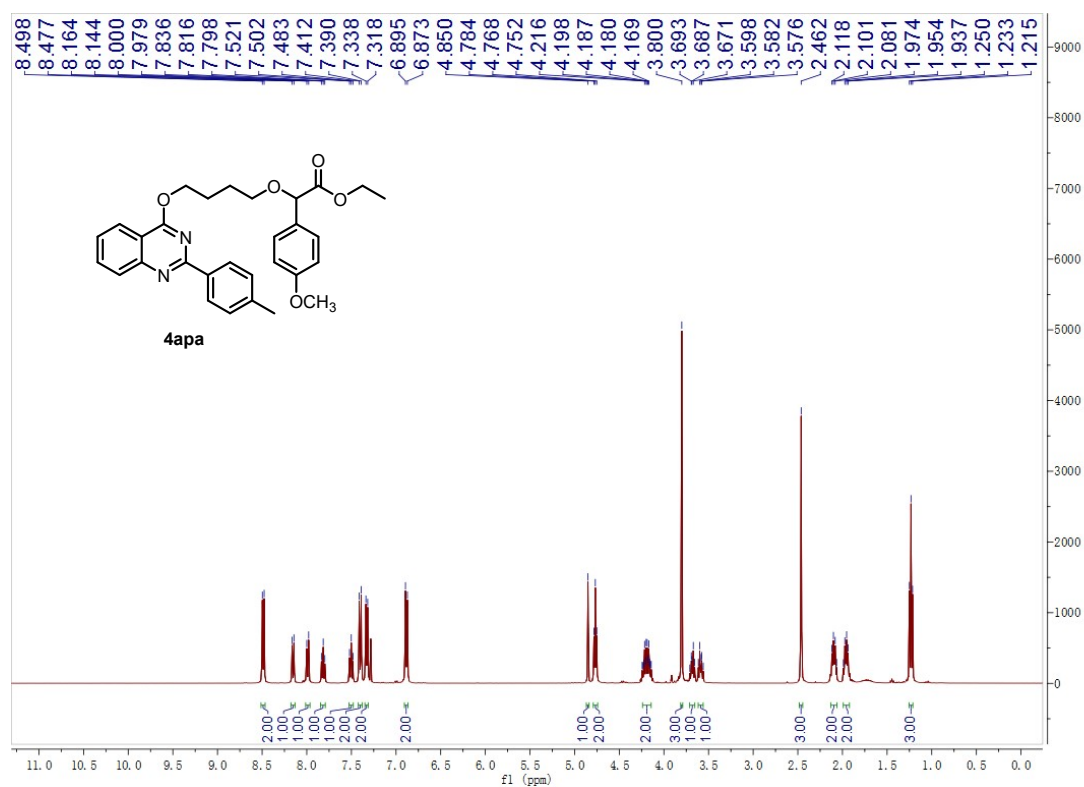

### <sup>13</sup>C-NMR of **4apa** (CDCl<sub>3</sub>, 100 Hz)

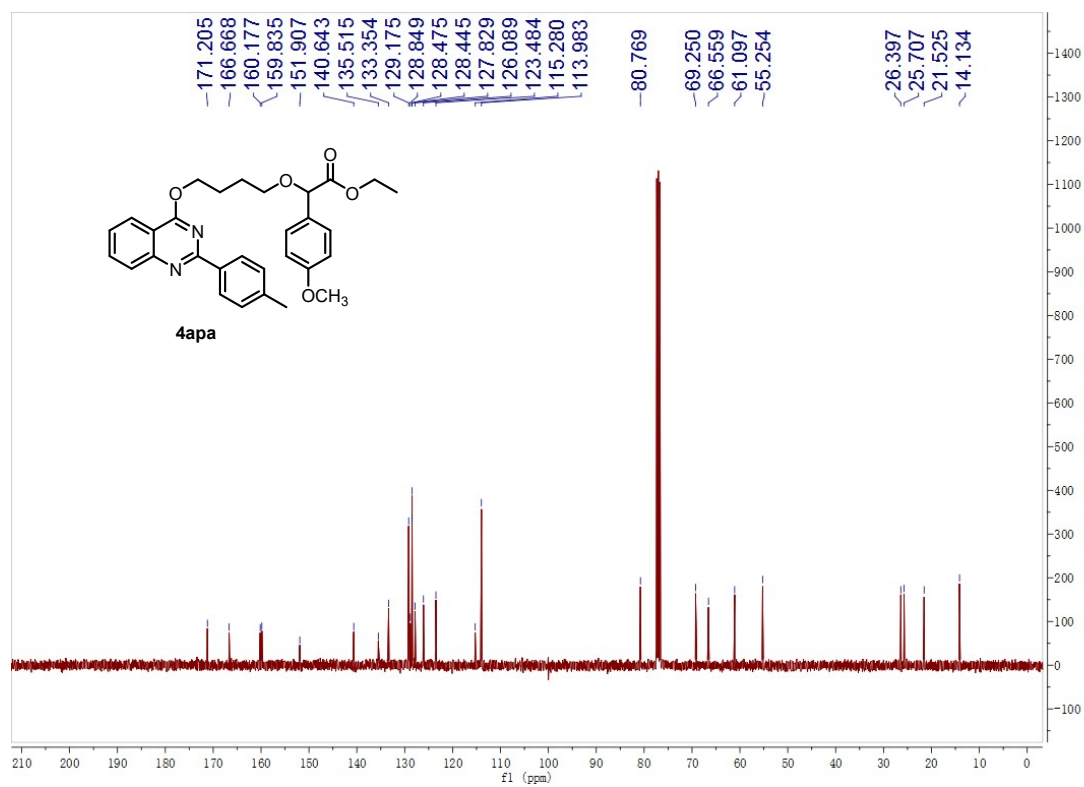

<sup>1</sup>H-NMR of **4ara** (CDCl<sub>3</sub>, 400 Hz)

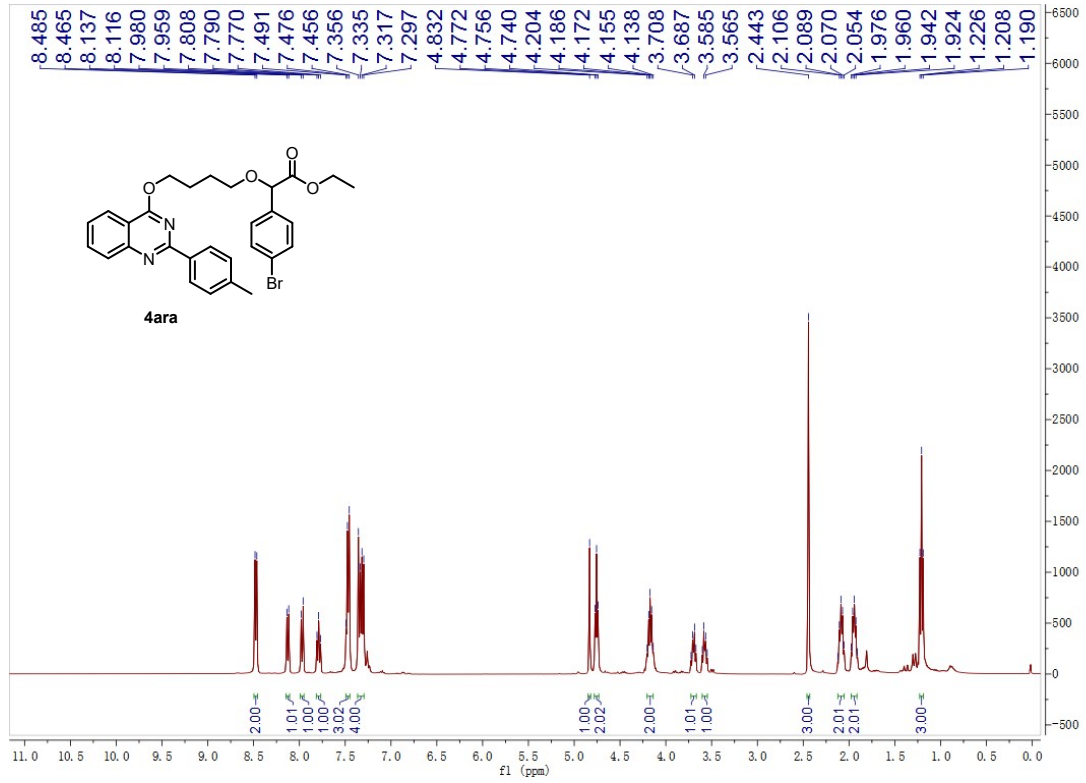

<sup>13</sup>C-NMR of **4ara** (CDCl<sub>3</sub>, 100 Hz)

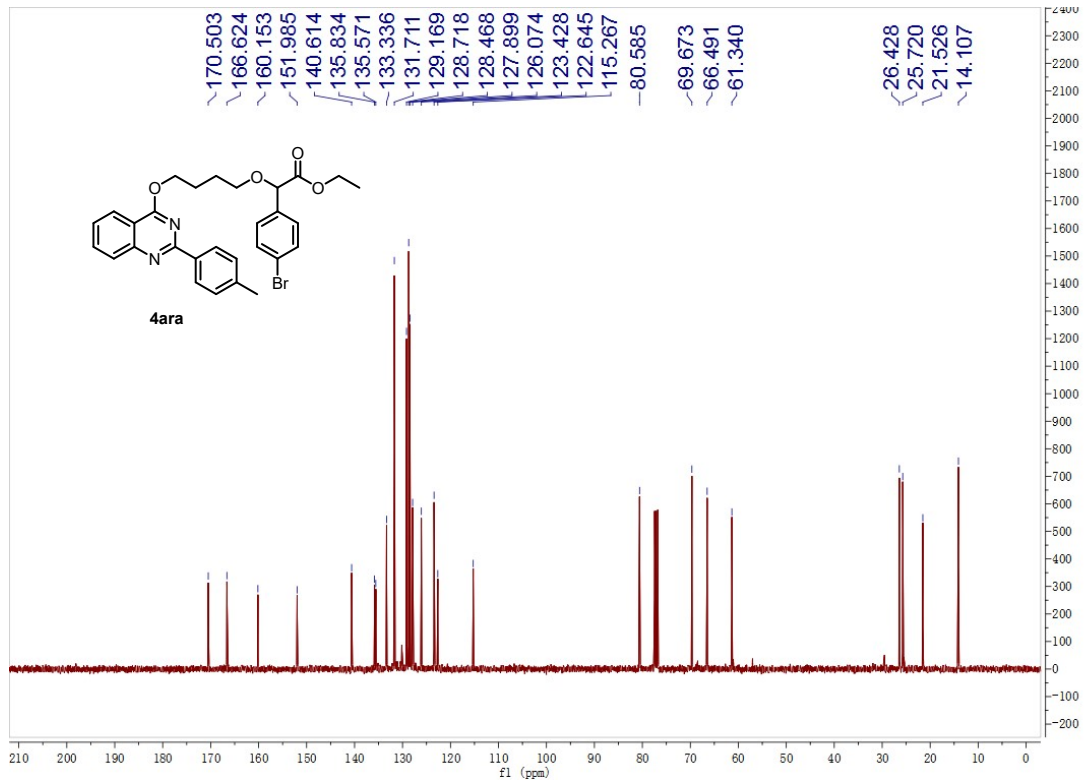

<sup>1</sup>H-NMR of **4asa** (CDCl<sub>3</sub>, 400 Hz)

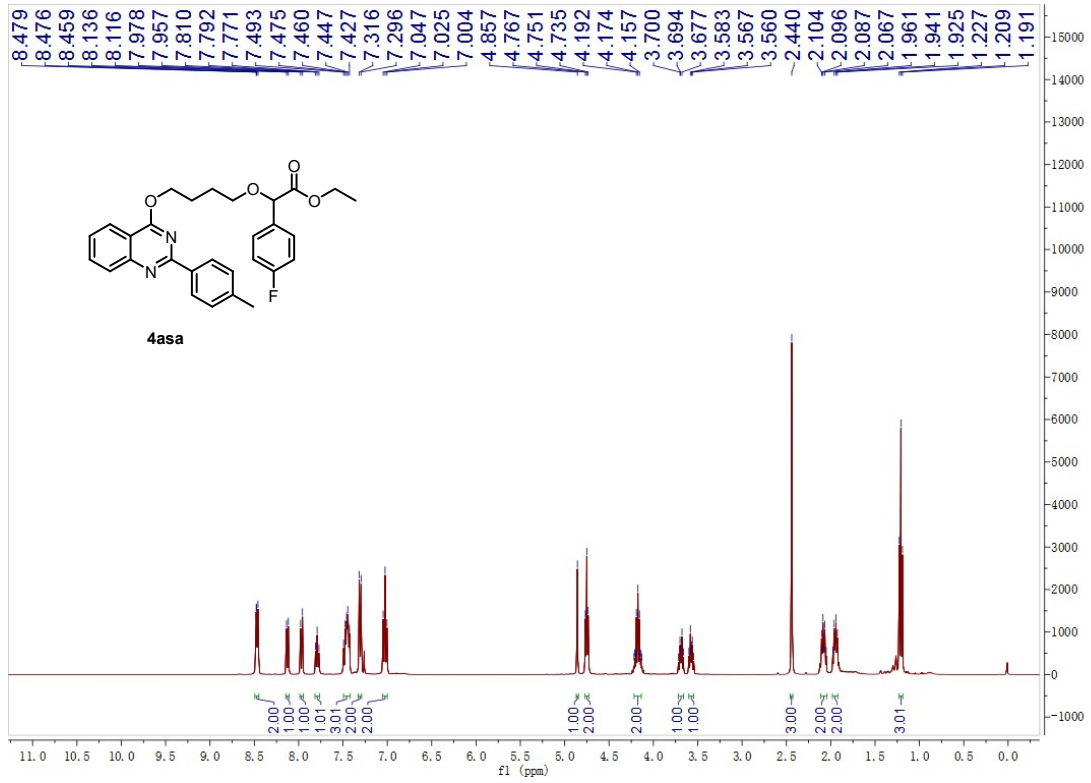

<sup>13</sup>C-NMR of **4asa** (CDCl<sub>3</sub>, 100 Hz)

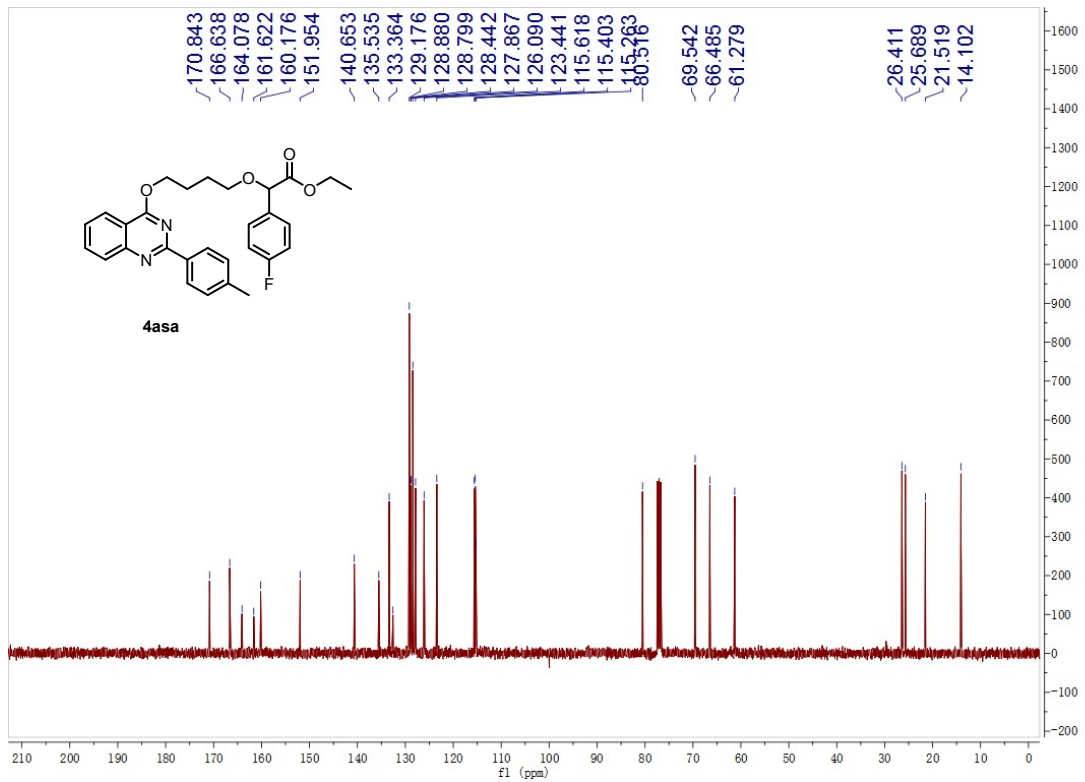

<sup>19</sup>F-NMR of **4asa** (CDCl<sub>3</sub>, 376 Hz)

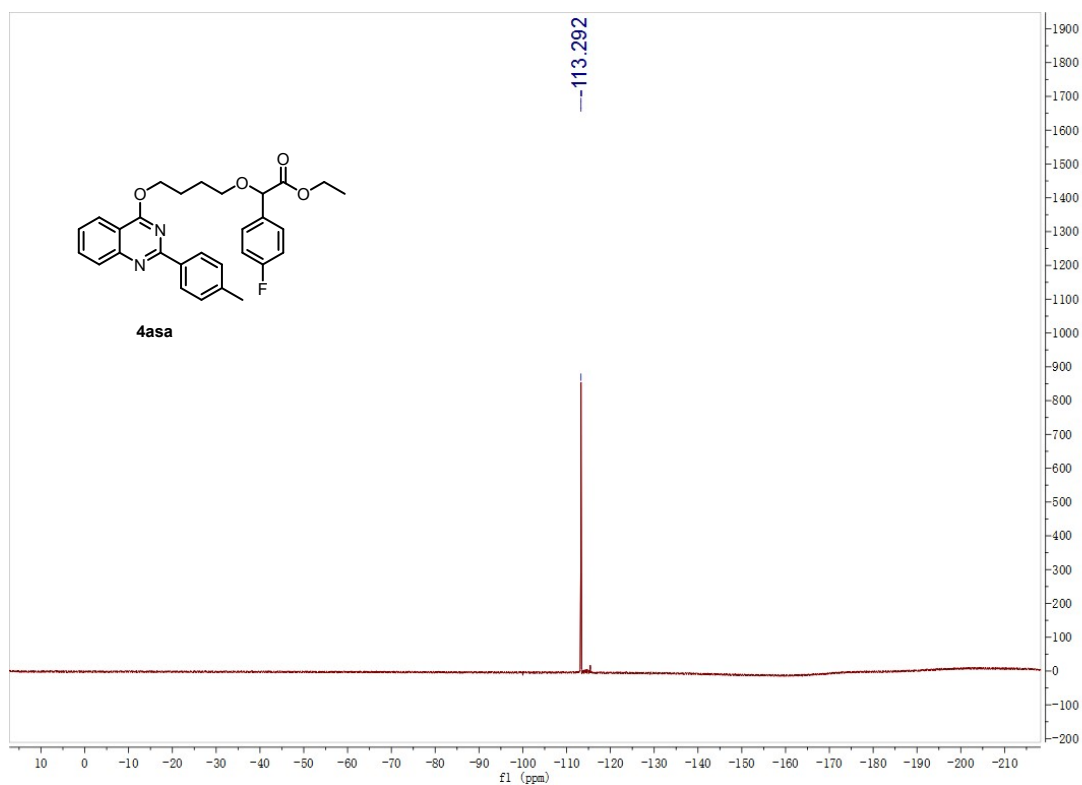

<sup>1</sup>H-NMR of **4ata** (CDCl<sub>3</sub>, 400 Hz)

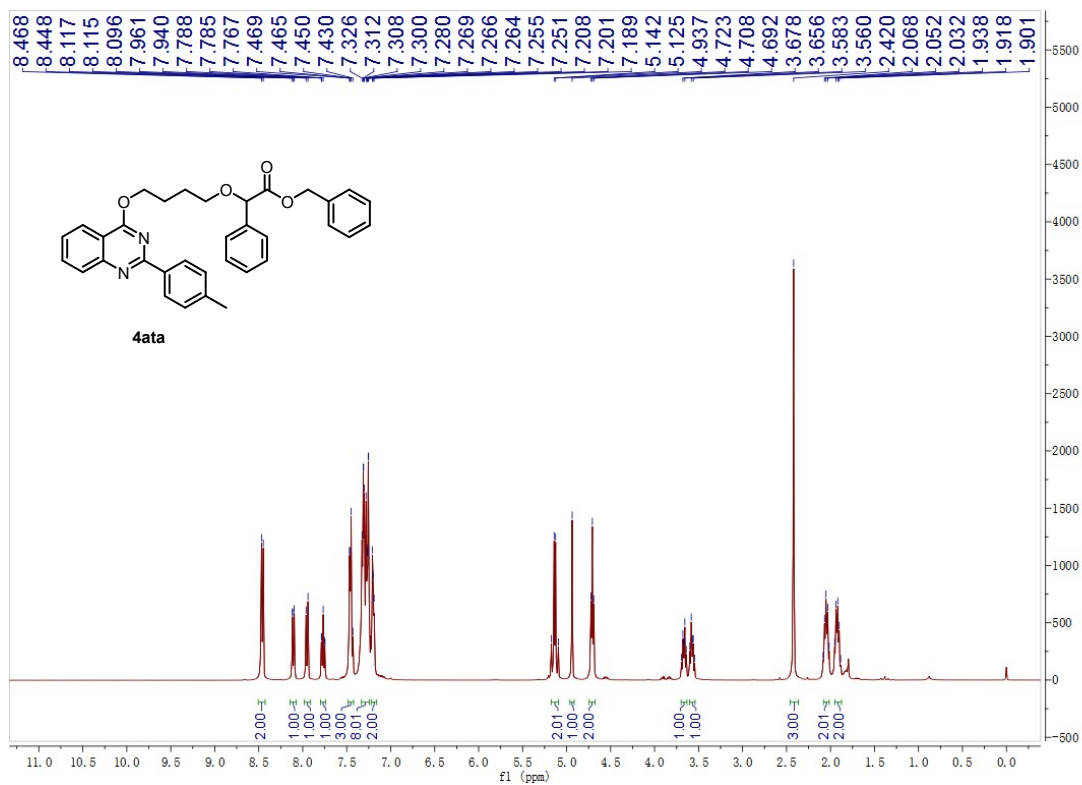



<sup>13</sup>C-NMR of **4ata** (CDCl<sub>3</sub>, 100 Hz)

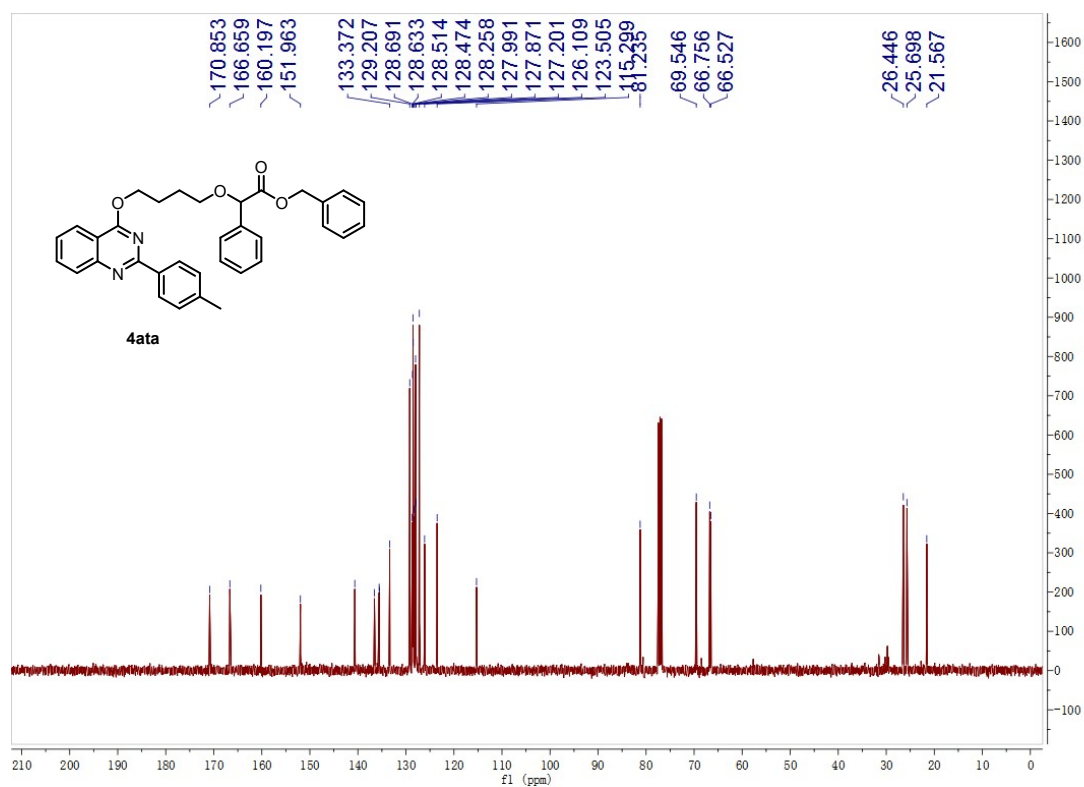

<sup>1</sup>H-NMR of **4aua** (CDCl<sub>3</sub>, 400 Hz)

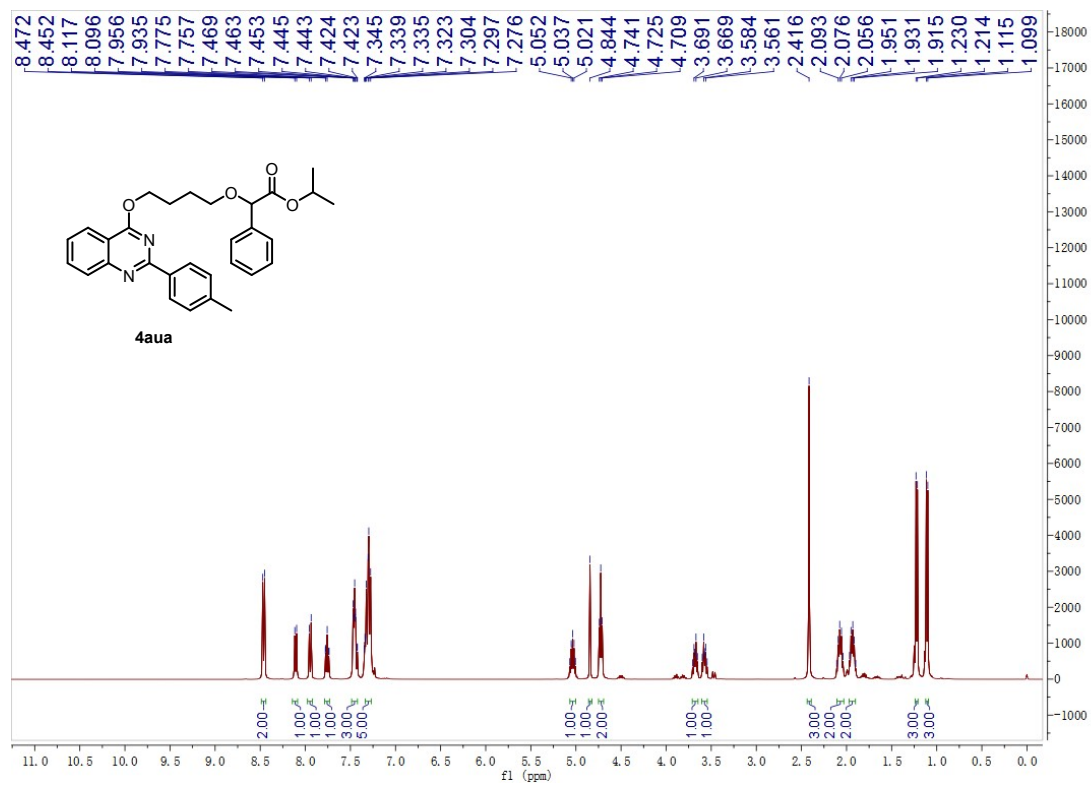

<sup>13</sup>C-NMR of **4a** (CDCl<sub>3</sub>, 100 Hz)

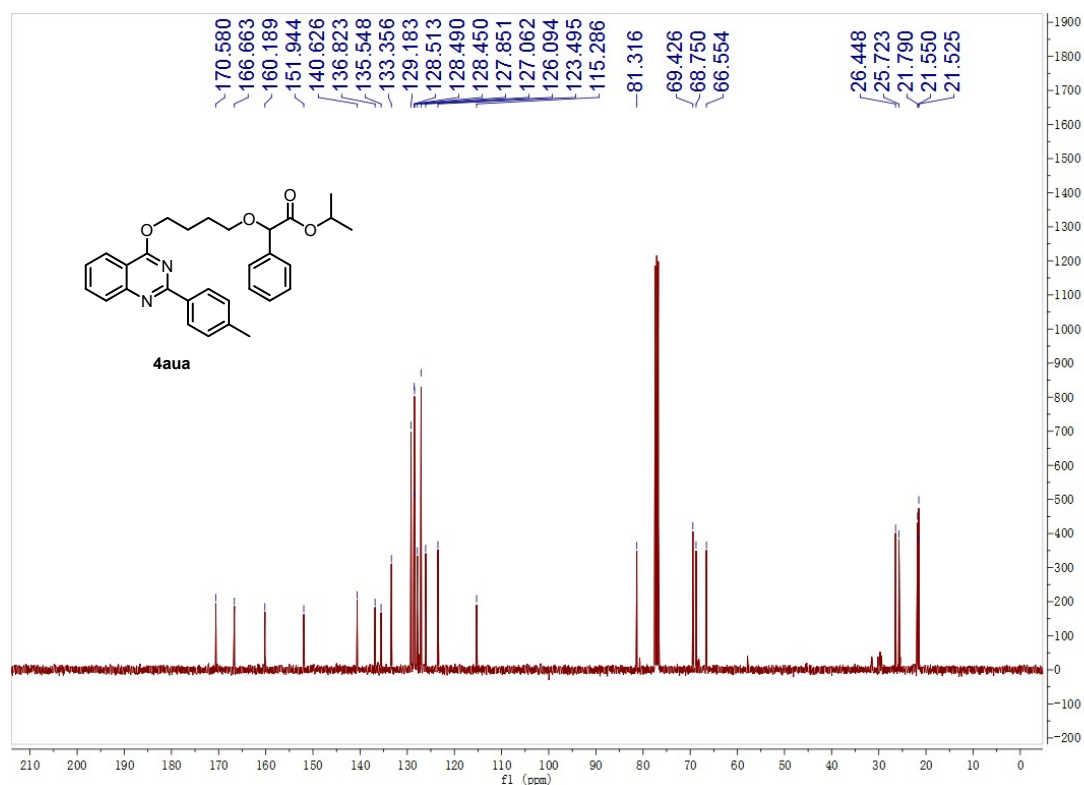

<sup>1</sup>H-NMR of **4a** (CDCl<sub>3</sub>, 400 Hz)

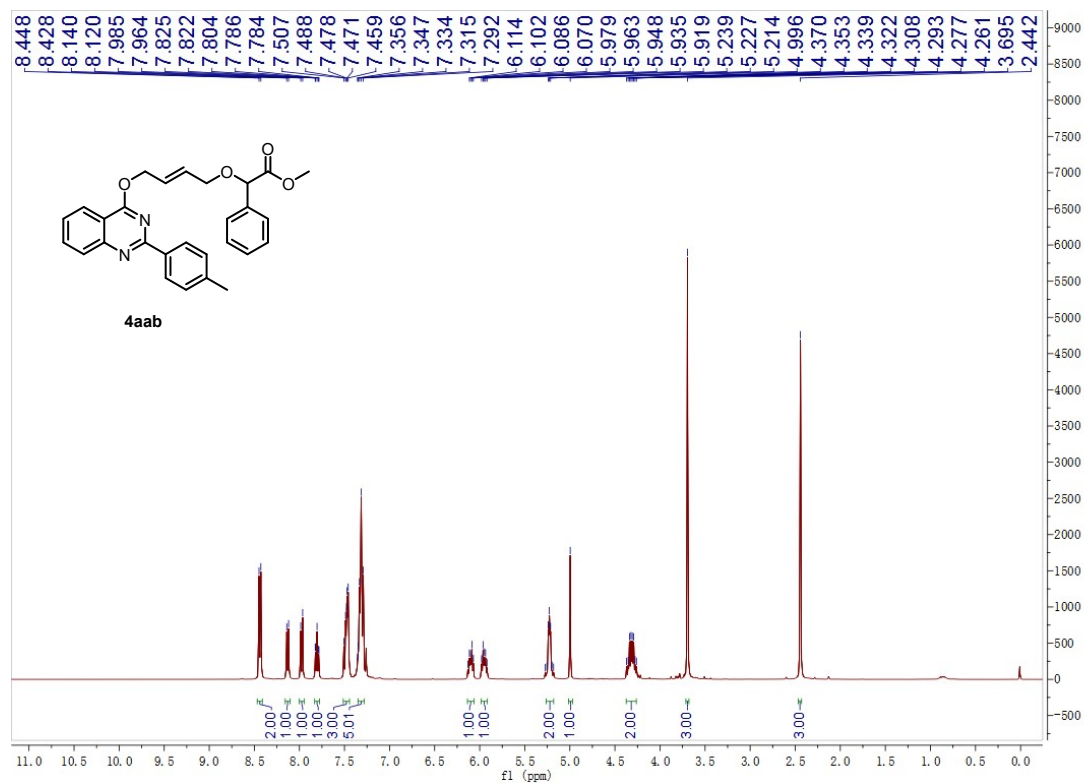



<sup>13</sup>C-NMR of **4aac** (CDCl<sub>3</sub>, 100 Hz)

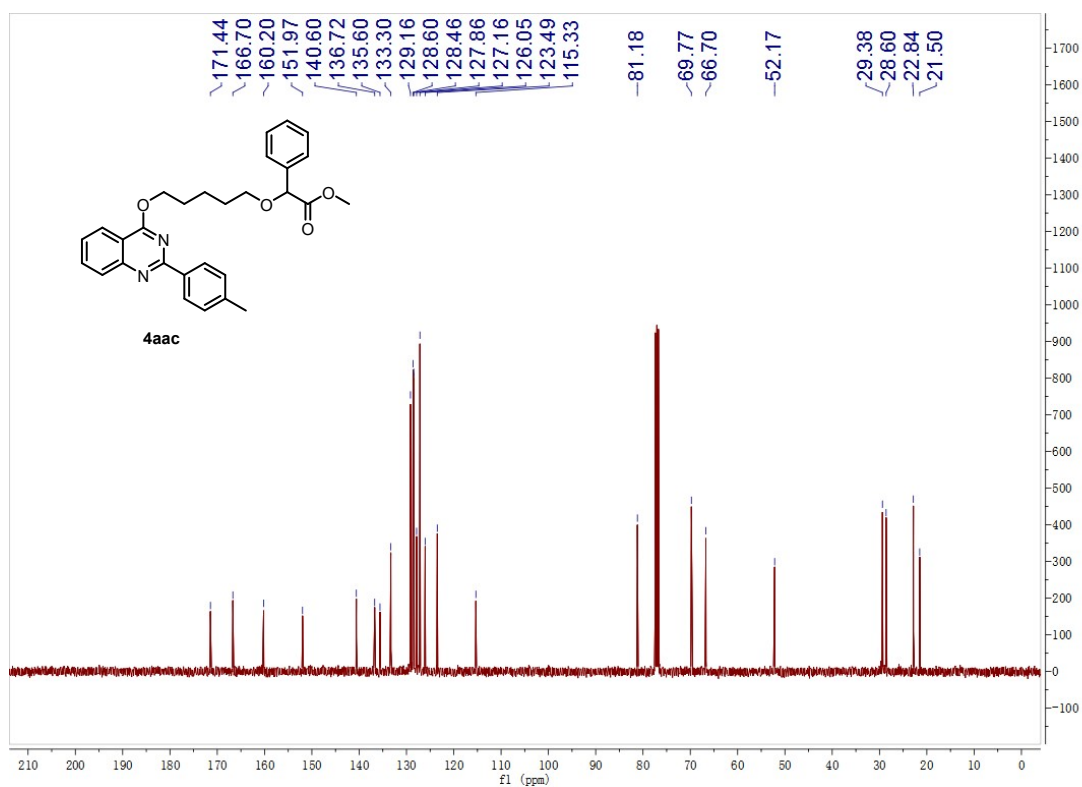

<sup>1</sup>H-NMR of **4aad** (CDCl<sub>3</sub>, 400 Hz)

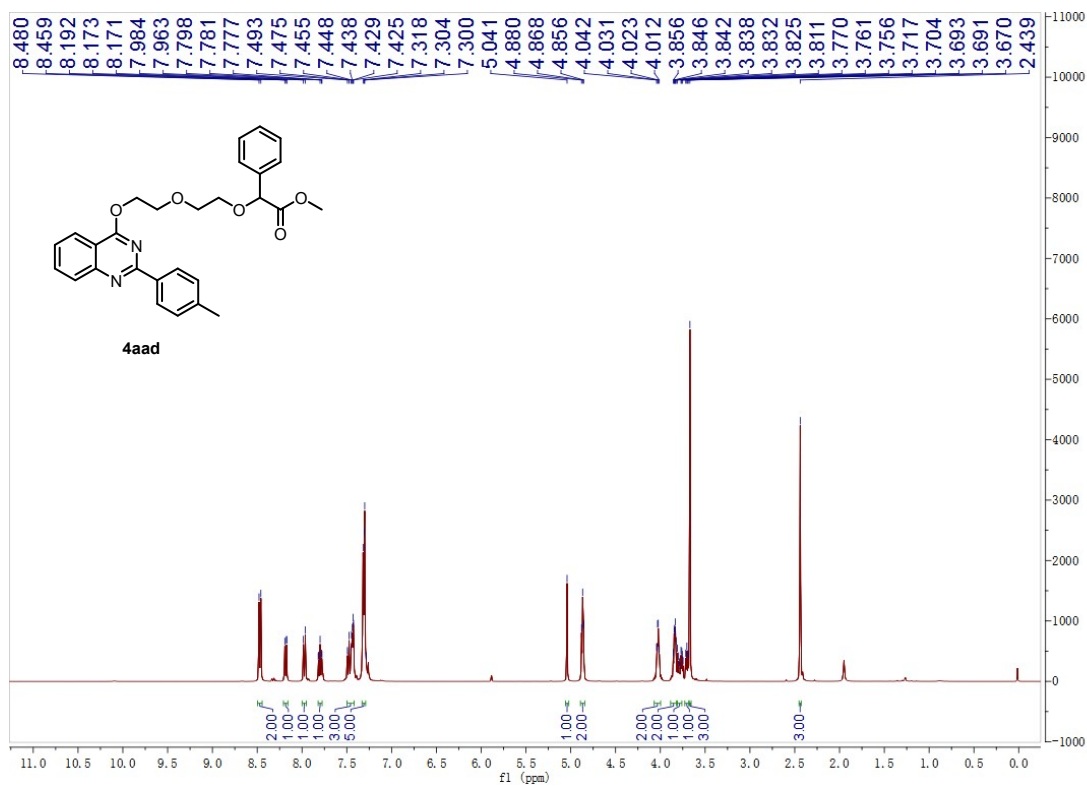

<sup>13</sup>C-NMR of **4aad** (CDCl<sub>3</sub>, 100 Hz)

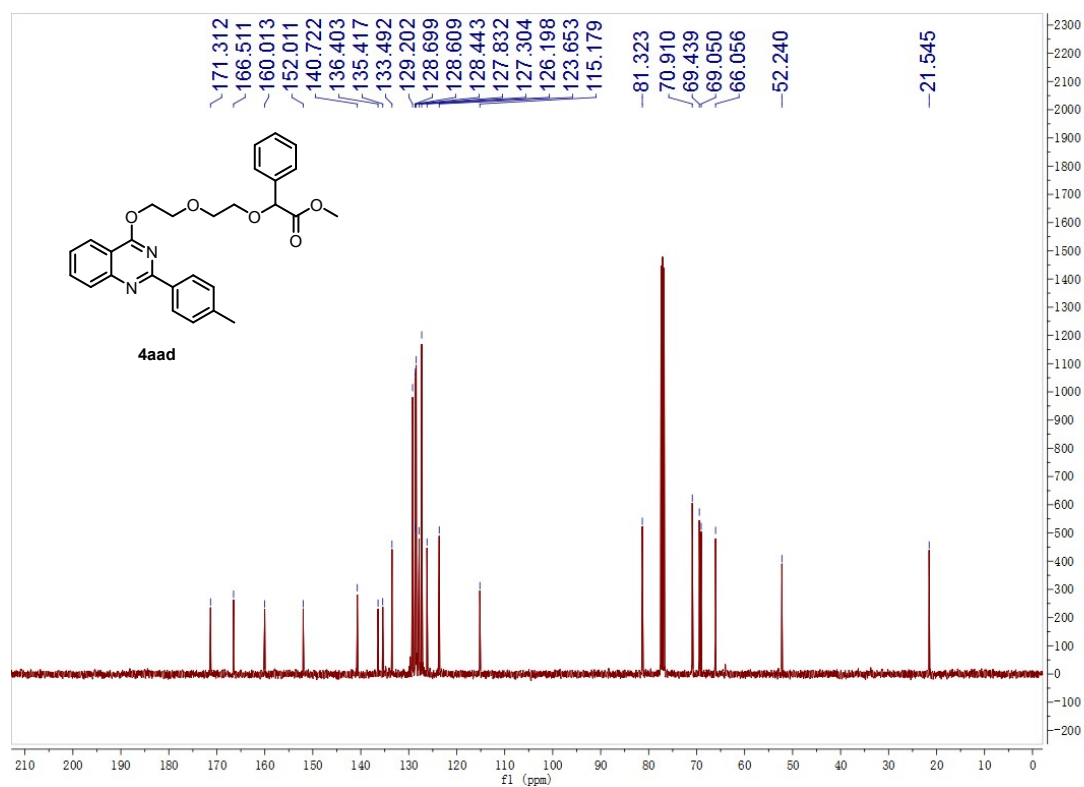

<sup>1</sup>H-NMR of **4aae<sub>1</sub>/4aae<sub>2</sub>** (CDCl<sub>3</sub>, 400 Hz)

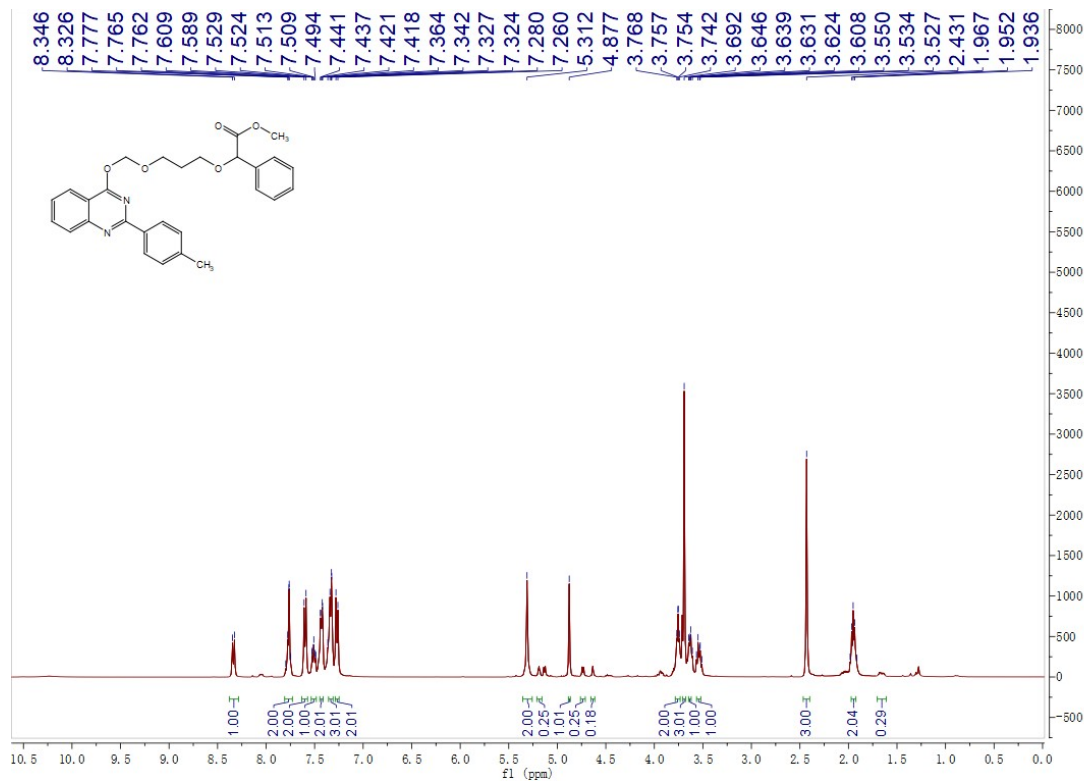

<sup>13</sup>C-NMR of **4aa<sub>1</sub>**/**4aa<sub>2</sub>** (CDCl<sub>3</sub>, 100 Hz)

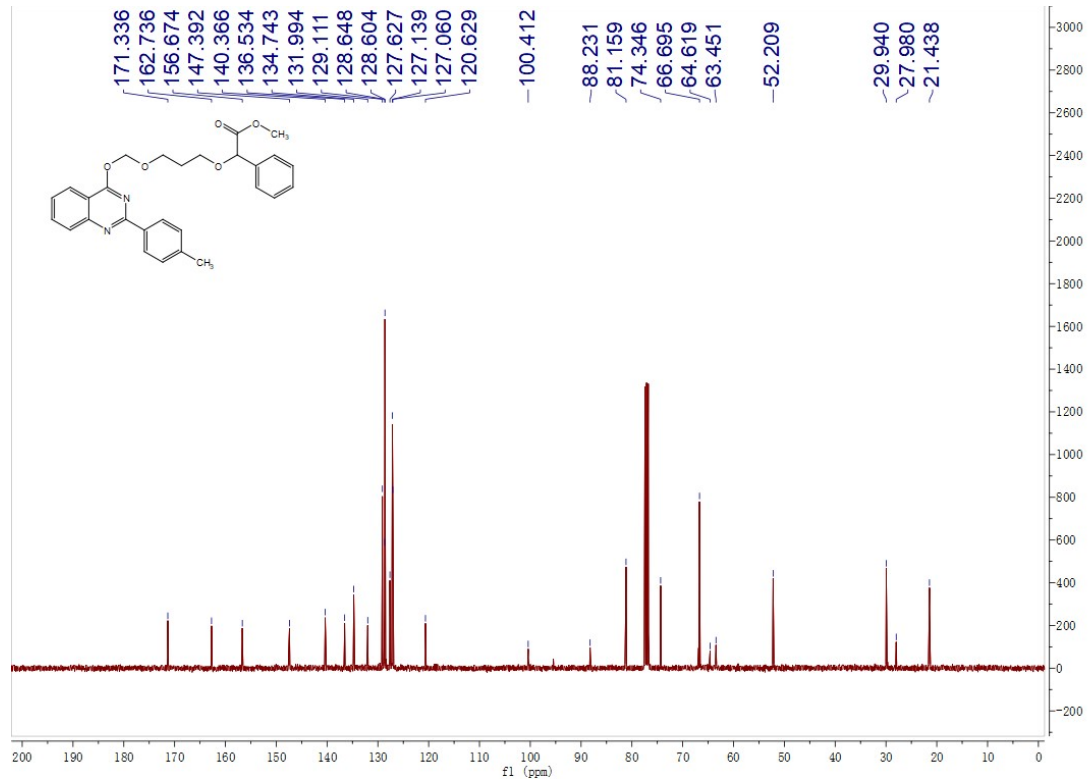

<sup>1</sup>H-NMR of **5u<sub>1aa</sub>** (CDCl<sub>3</sub>, 400 Hz)

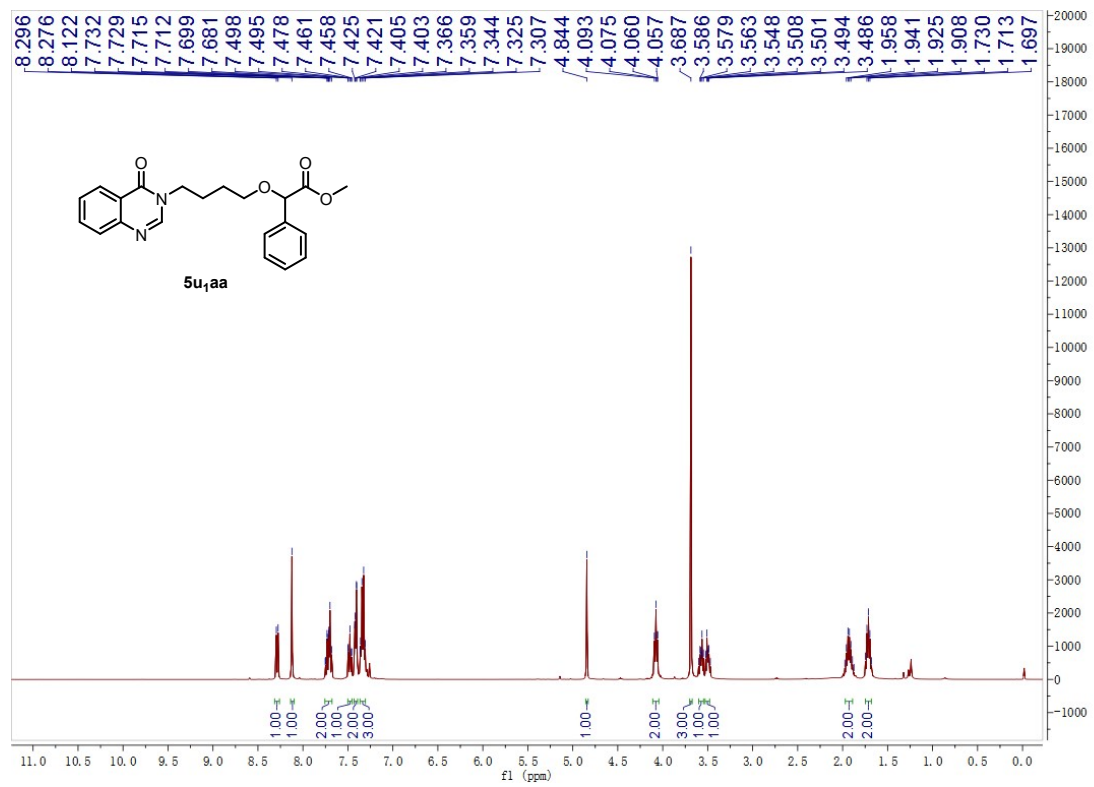

<sup>13</sup>C-NMR of **5u<sub>1aa</sub>** (CDCl<sub>3</sub>, 100 Hz)

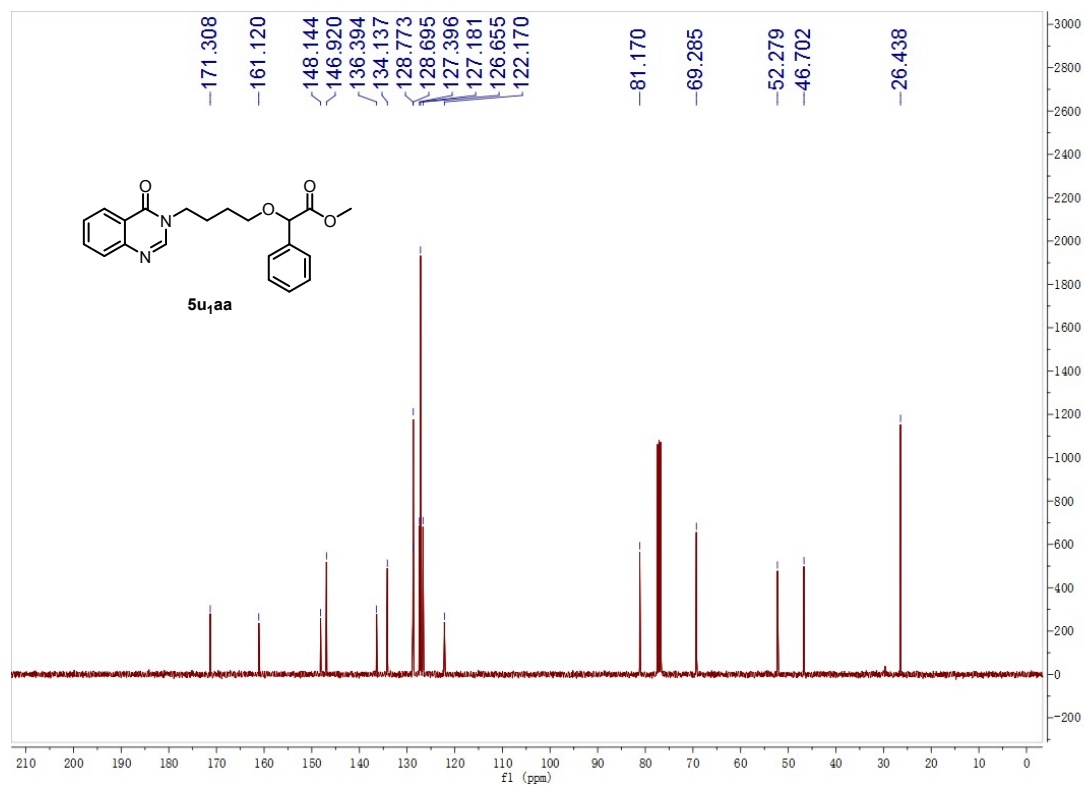

<sup>1</sup>H-NMR of **5u<sub>2aa</sub>** (CDCl<sub>3</sub>, 400 Hz)

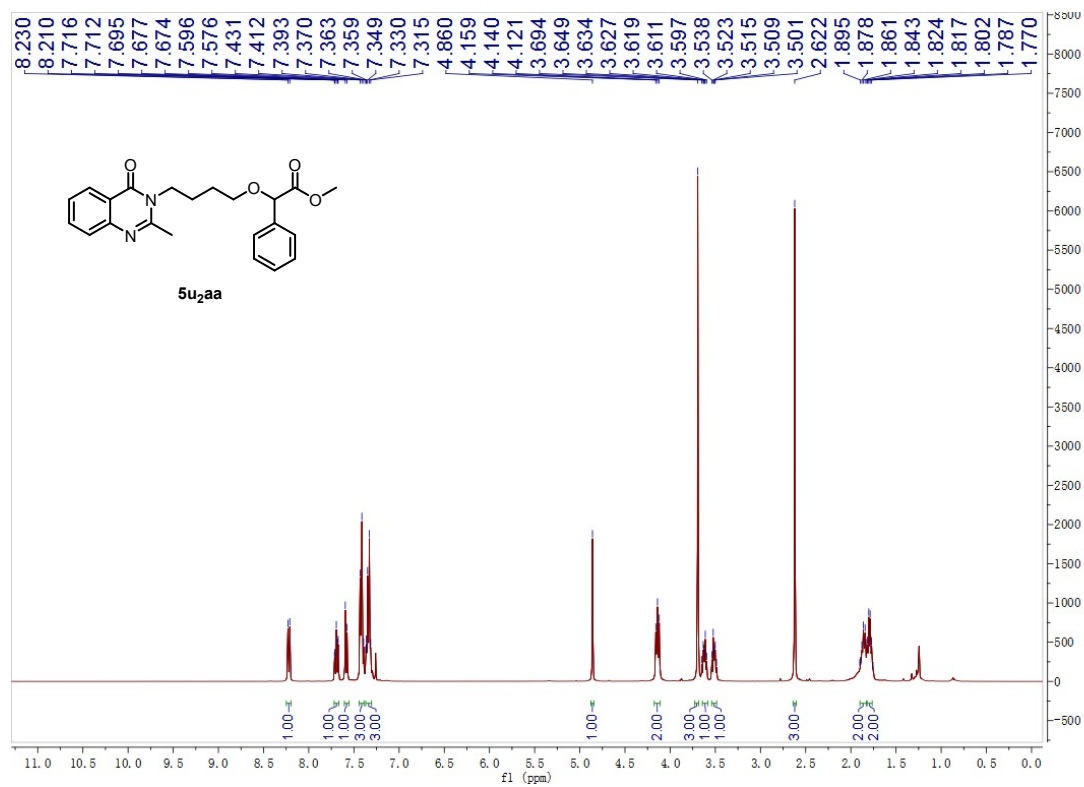

<sup>13</sup>C-NMR of **5u<sub>2aa</sub>** (CDCl<sub>3</sub>, 100 Hz)

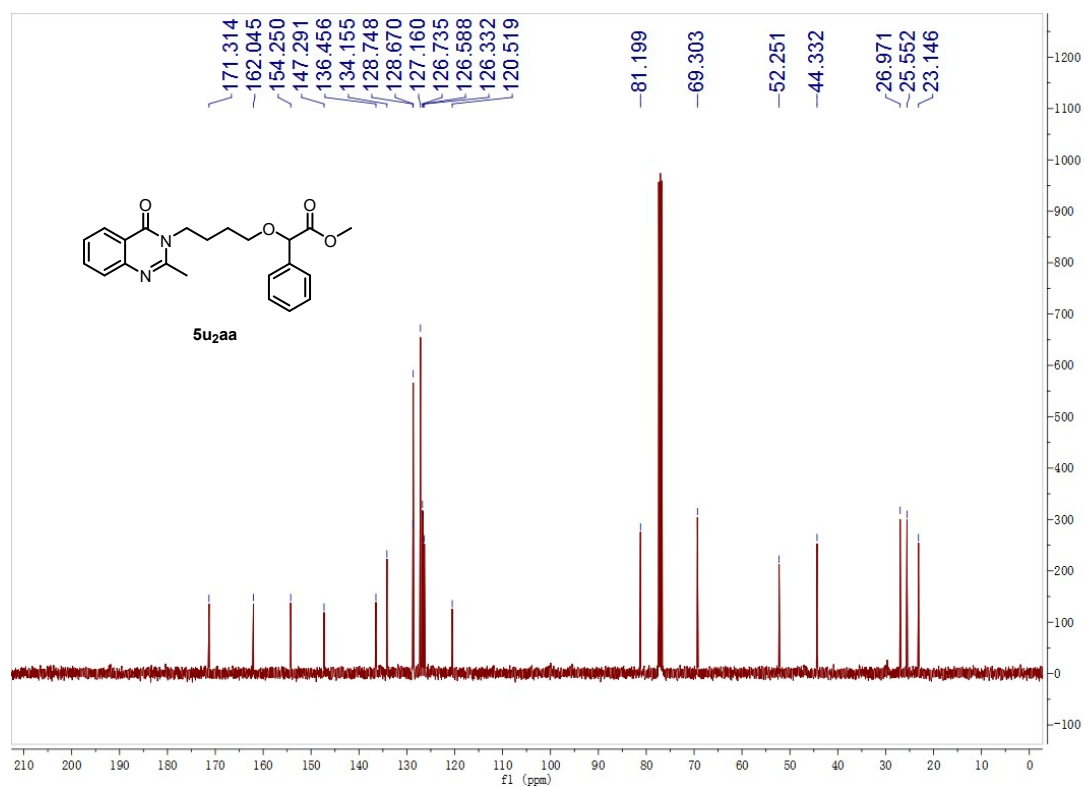

<sup>1</sup>H-NMR of **5u<sub>3aa</sub>** (CDCl<sub>3</sub>, 400 Hz)

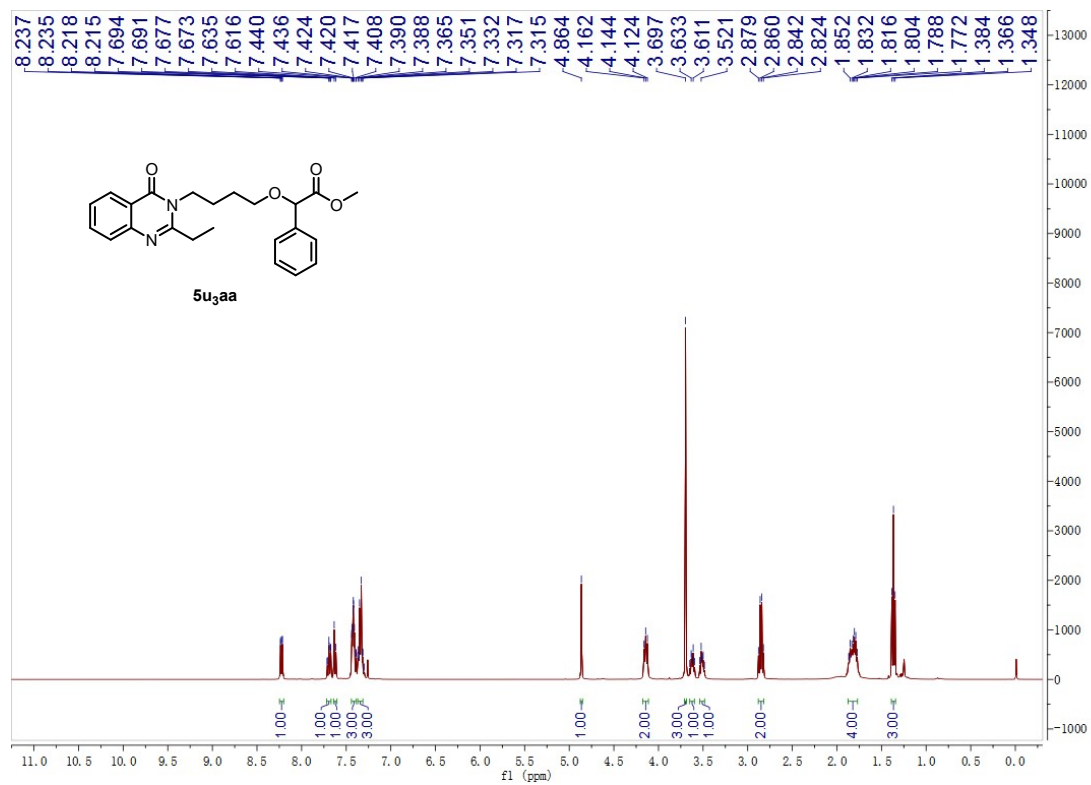



<sup>13</sup>C-NMR of **5u<sub>3</sub>aa** (CDCl<sub>3</sub>, 100 Hz)

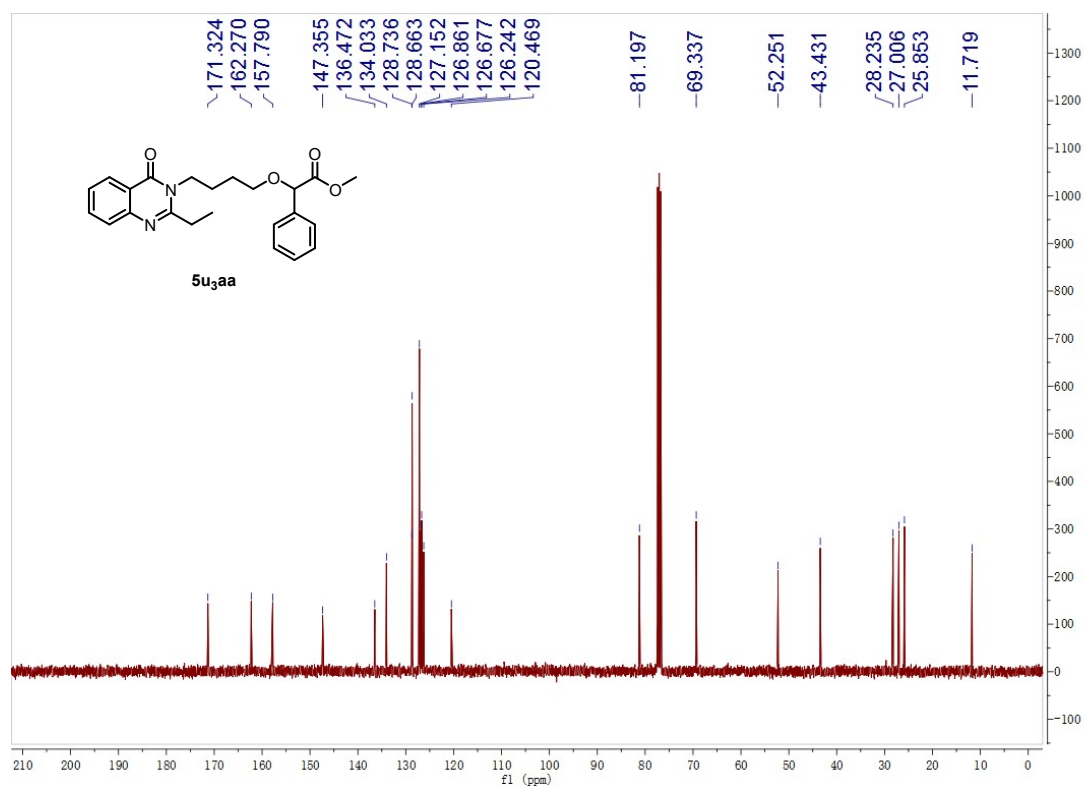

<sup>1</sup>H-NMR of **6ab** (CDCl<sub>3</sub>, 400 Hz)

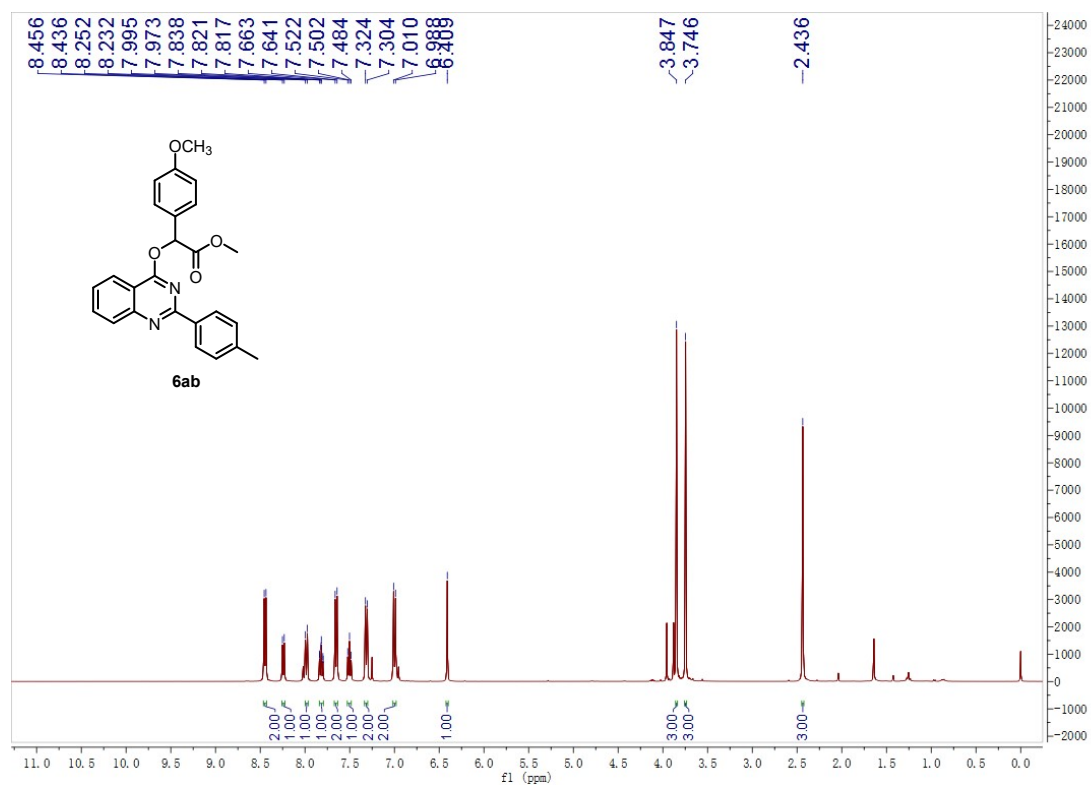

<sup>13</sup>C-NMR of **6ab** (CDCl<sub>3</sub>, 100 Hz)

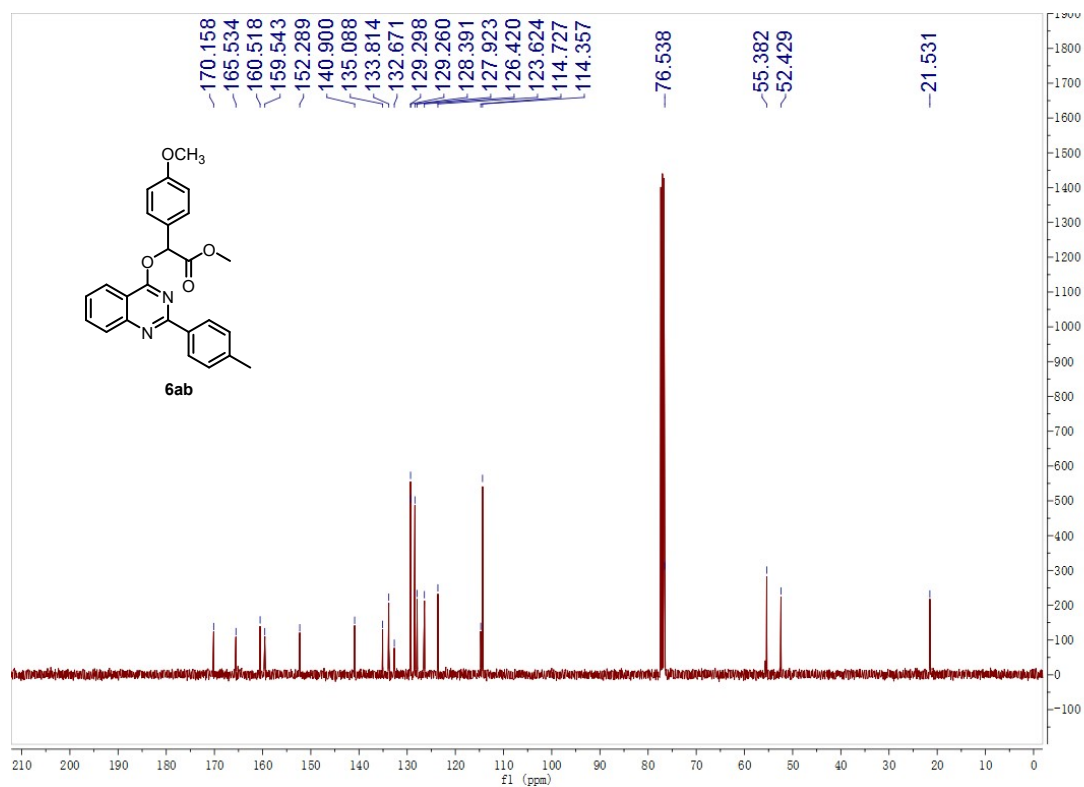

<sup>1</sup>H-NMR of **6ap** (CDCl<sub>3</sub>, 400 Hz)

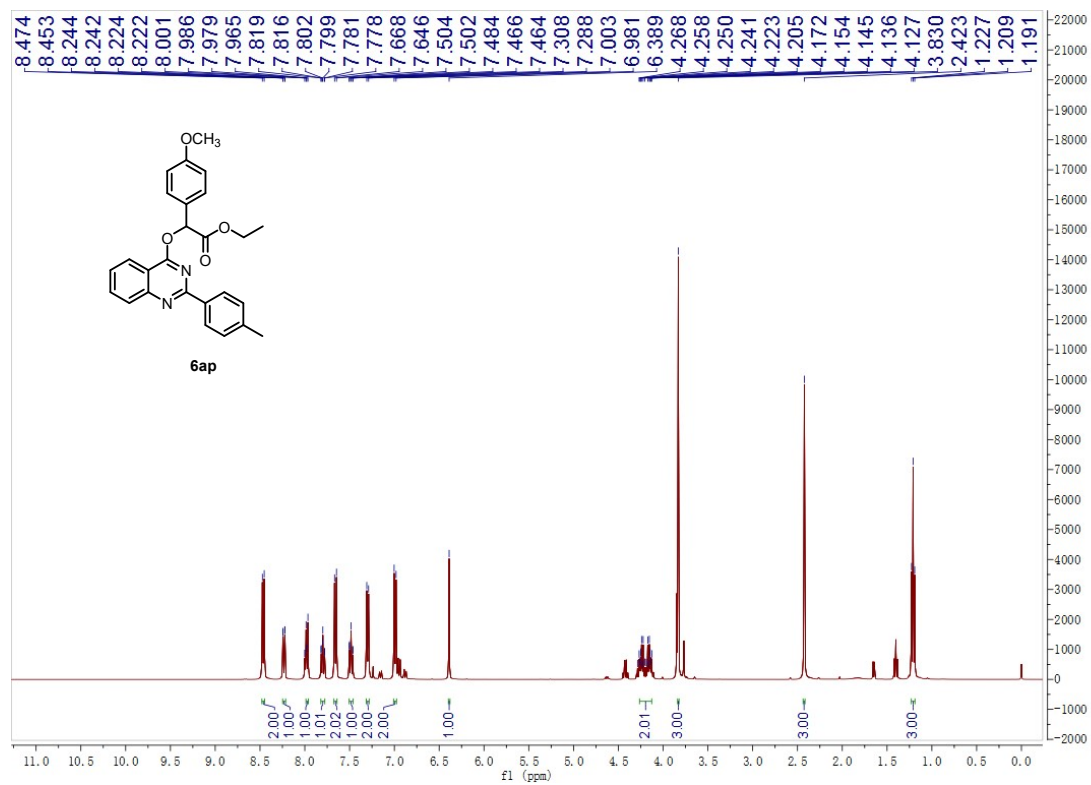

$^{13}\text{C}$ -NMR of **6ap** ( $\text{CDCl}_3$ , 100 Hz)

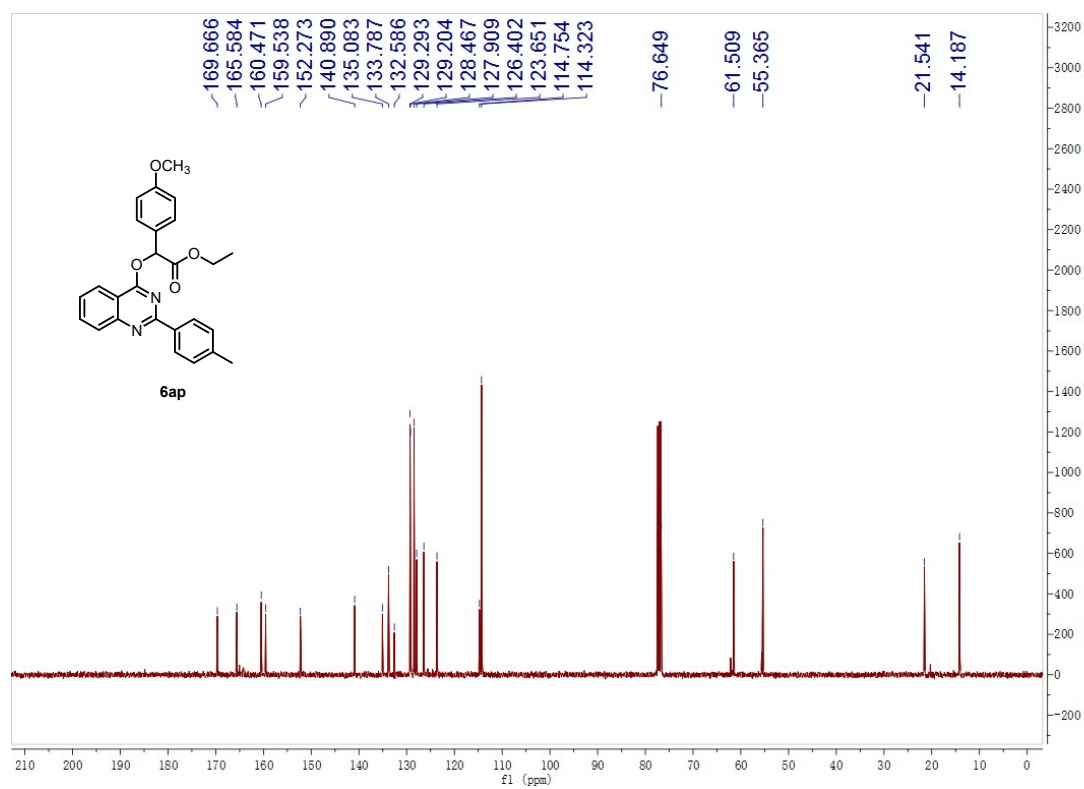

Supplement: d4ob00295d1.pdf [file d4ob00295d1.pdf]
